# Supplementary material for: Breakthrough tuberculosis disease among people with HIV – Should we be worried? A retrospective longitudinal study
Source: PLoS One. 2019 Feb 4;14(2):e0211688. doi: 10.1371/journal.pone.0211688 (PMC6361510; doi:10.1371/journal.pone.0211688)
Supplement: S1 Table — (XLS) [file pone.0211688.s001.xls]

## Sheet: Breakthrough TB
FacilityType	FacilityID	Region	CRDID_real	CRDID	IRIS	age	sex	stage	CD4	tbtime	Year	Month_Cat	Cat	TB	IPT_related_TB	Outcome	IRIS6	time_TBART	Last_Status	time_Mortality
Hospital	21	12	120021007926603	1		Adults >=15	Female	III or IV	<100	1	0.00273973		IPT and ART	0	No TB	0			DEAD	0.00273973
Hospital	21	12	120021008236685	3		Adults >=15	Female	III or IV	>349	2	0.00547945		IPT only	0	No TB	0				0.00547945
Hospital	271	07	7.0271e+13	2		Adults >=15	Male	III or IV	>349	2	0.00547945		IPT only	0	No TB	0				0.00547945
Hospital	47	07	7.0047e+13	5		Adults >=15	Female	I or II	>349	3	0.00821918		IPT only	0	No TB	0				0.00821918
Hospital	21	12	120021007205635	385		Adults >=15	Female	I or II	<100	208	0.569863		IPT and ART	0	No TB	0			TO	0.569863
Hospital	49	07	7.0049e+13	517		Adults >=15	Female	I or II	<100	289	0.791781		IPT and ART	0	No TB	0			TO	0.791781
Hospital	49	07	7.0049e+13	555		Adults >=15	Female	I or II	<100	306	0.838356		IPT and ART	0	No TB	0			TO	0.838356
Hospital	21	12	120021006879356	567		Adults >=15	Female	I or II	<100	316	0.865753		IPT and ART	0	No TB	0			TO	0.865753
Hospital	117	14	140117008123854	584		Adults >=15	Female	I or II	<100	327	0.89589		IPT and ART	0	No TB	0			DROP	0.89589
Hospital	49	07	7.0049e+13	645		Adults >=15	Female	I or II	<100	356	0.975342		IPT and ART	0	No TB	0			DROP	0.975342
Hospital	271	07	7.0271e+13	663		Adults >=15	Female	I or II	<100	364	0.99726		IPT and ART	0	No TB	0			Active	0.99726
Hospital	271	07	7.0271e+13	723		Adults >=15	Female	I or II	<100	387	1.06027		IPT and ART	0	No TB	0			Active	1.06027
Hospital	59	14	140059008478452	831		Adults >=15	Female	I or II	<100	436	1.19452		IPT and ART	0	No TB	0			Active	1.19452
Hospital	49	07	70049007492203	913		Adults >=15	Female	I or II	<100	478	1.30959		IPT and ART	0	No TB	0			DROP	1.30959
Hospital	21	12	120021007207860	1179		Adults >=15	Female	I or II	<100	577	1.58082		IPT and ART	0	No TB	0			DROP	1.58082
Hospital	21	12	120021007306531	1237		Adults >=15	Female	I or II	<100	599	1.6411		IPT and ART	0	No TB	0			TO	1.6411
Hospital	51	07	7.0051e+13	1397		Adults >=15	Female	I or II	<100	671	1.83836		IPT and ART	0	No TB	0			TO	1.83836
Hospital	49	07	7.0049e+13	1398		Adults >=15	Female	I or II	<100	672	1.8411		IPT and ART	0	No TB	0			TO	1.8411
Hospital	49	07	7.0049e+13	1500		Adults >=15	Female	I or II	<100	710	1.94521		IPT and ART	0	No TB	0			TO	1.94521
Hospital	271	07	7.0271e+13	1544		Adults >=15	Female	I or II	<100	734	2.01096		IPT and ART	0	No TB	0			Active	2.01096
Hospital	47	07	7.0047e+13	1545		Adults >=15	Female	I or II	<100	734	2.01096		IPT and ART	0	No TB	0			Active	2.01096
Hospital	117	14	140117007312554	1613		Adults >=15	Female	I or II	<100	759	2.07945		IPT and ART	0	No TB	0			Active	2.07945
Hospital	49	07	7.0049e+13	1646		Adults >=15	Female	I or II	<100	778	2.13151		IPT and ART	0	No TB	0			TO	2.13151
Hospital	153	07	7.0153e+13	1694		Adults >=15	Female	I or II	<100	802	2.19726		IPT and ART	0	No TB	0			TO	2.19726
Hospital	21	12	120021006343880	1740		Adults >=15	Female	I or II	<100	824	2.25753		IPT and ART	0	No TB	0			TO	2.25753
Hospital	59	14	140059007726213	1757		Adults >=15	Female	I or II	<100	833	2.28219		IPT and ART	0	No TB	0			Active	2.28219
Hospital	271	07	7.0271e+13	1791		Adults >=15	Female	I or II	<100	851	2.33151		IPT and ART	0	No TB	0			Active	2.33151
Hospital	176	07	7.0176e+13	1828		Adults >=15	Female	I or II	<100	873	2.39178		IPT and ART	0	No TB	0			Active	2.39178
Hospital	153	07	7.0153e+13	1844		Adults >=15	Female	I or II	<100	882	2.41644		IPT and ART	0	No TB	0			Active	2.41644
Hospital	49	07	7.0049e+13	1857		Adults >=15	Female	I or II	<100	887	2.43014		IPT and ART	0	No TB	0			TO	2.43014
Hospital	153	07	70153006315358	1905		Adults >=15	Female	I or II	<100	916	2.50959		IPT and ART	0	No TB	0			Active	2.50959
Hospital	51	07	7.0051e+13	1974		Adults >=15	Female	I or II	<100	947	2.59452		IPT and ART	0	No TB	0			Active	2.59452
Hospital	59	14	140059007409742	2024		Adults >=15	Female	I or II	<100	967	2.64932		IPT and ART	0	No TB	0			Active	2.64932
Hospital	21	12	120021007620215	2046		Adults >=15	Female	I or II	<100	978	2.67945		IPT and ART	0	No TB	0			DROP	2.67945
Hospital	115	14	140115008349248	2077		Adults >=15	Female	I or II	<100	990	2.71233		IPT and ART	0	No TB	0			Active	2.71233
Hospital	47	07	7.0047e+13	2093		Adults >=15	Female	I or II	<100	996	2.72877		IPT and ART	0	No TB	0			Active	2.72877
Hospital	271	07	7.0271e+13	2150		Adults >=15	Female	I or II	<100	1018	2.78904		IPT and ART	0	No TB	0			Active	2.78904
Hospital	59	14	140059007876259	2203		Adults >=15	Female	I or II	<100	1035	2.83562		IPT and ART	0	No TB	0			Active	2.83562
Hospital	51	07	7.0051e+13	2247		Adults >=15	Female	I or II	<100	1054	2.88767		IPT and ART	0	No TB	0			Active	2.88767
Hospital	49	07	7.0049e+13	2248		Adults >=15	Female	I or II	<100	1054	2.88767		IPT and ART	0	No TB	0			Active	2.88767
Hospital	59	14	140059008086410	2275		Adults >=15	Female	I or II	<100	1061	2.90685		IPT and ART	0	No TB	0			Active	2.90685
Hospital	49	07	7.0049e+13	2294		Adults >=15	Female	I or II	<100	1066	2.92055		IPT and ART	0	No TB	0			Active	2.92055
Hospital	59	14	140059006520621	2323		Adults >=15	Female	I or II	<100	1076	2.94795		IPT and ART	0	No TB	0			TO	2.94795
Hospital	59	14	140059007918992	2353		Adults >=15	Female	I or II	<100	1084	2.96986		IPT and ART	0	No TB	0			Active	2.96986
Hospital	21	12	120021007854769	2359		Adults >=15	Female	I or II	<100	1087	2.97808		IPT and ART	0	No TB	0			Active	2.97808
Hospital	117	14	140117006912743	2360		Adults >=15	Female	I or II	<100	1087	2.97808		IPT and ART	0	No TB	0			Active	2.97808
Hospital	115	14	140115008849084	2398		Adults >=15	Female	I or II	<100	1102	3.01918		IPT and ART	0	No TB	0			DEAD	3.01918
Hospital	47	07	7.0047e+13	2400		Adults >=15	Female	I or II	<100	1102	3.01918		IPT and ART	0	No TB	0			DROP	3.01918
Hospital	49	07	7.0049e+13	2410		Adults >=15	Female	I or II	<100	1106	3.03014		IPT and ART	0	No TB	0			Active	3.03014
Hospital	21	12	120021007900266	2434		Adults >=15	Female	I or II	<100	1114	3.05205		IPT and ART	0	No TB	0			Active	3.05205
Hospital	49	07	7.0049e+13	2447		Adults >=15	Female	I or II	<100	1121	3.07123		IPT and ART	0	No TB	0			Active	3.07123
Hospital	51	07	7.0051e+13	2473		Adults >=15	Female	I or II	<100	1130	3.09589		IPT and ART	0	No TB	0			Active	3.09589
Hospital	117	14	140117008187021	2475		Adults >=15	Female	I or II	<100	1131	3.09863		IPT and ART	0	No TB	0			Active	3.09863
Hospital	21	12	120021007876259	2501		Adults >=15	Female	I or II	<100	1140	3.12329		IPT and ART	0	No TB	0			Active	3.12329
Hospital	59	14	140059008145550	2538		Adults >=15	Female	I or II	<100	1154	3.16164		IPT and ART	0	No TB	0			Active	3.16164
Hospital	47	07	7.0047e+13	2569		Adults >=15	Female	I or II	<100	1163	3.1863		IPT and ART	0	No TB	0			Active	3.1863
Hospital	59	14	140059007098376	2600		Adults >=15	Female	I or II	<100	1175	3.21918		IPT and ART	0	No TB	0			Active	3.21918
Hospital	115	14	140115008312381	2617		Adults >=15	Female	I or II	<100	1179	3.23014		IPT and ART	0	No TB	0			Active	3.23014
Hospital	59	14	140059007164720	2640		Adults >=15	Female	I or II	<100	1186	3.24932		IPT and ART	0	No TB	0			Active	3.24932
Hospital	117	14	140117008021585	2767		Adults >=15	Female	I or II	<100	1236	3.3863		IPT and ART	0	No TB	0			Active	3.3863
Hospital	59	14	140059007736744	2772		Adults >=15	Female	I or II	<100	1238	3.39178		IPT and ART	0	No TB	0			Active	3.39178
Hospital	153	07	7.0153e+13	2774		Adults >=15	Female	I or II	<100	1238	3.39178		IPT and ART	0	No TB	0			Active	3.39178
Hospital	59	14	140059007230563	2807		Adults >=15	Female	I or II	<100	1248	3.41918		IPT and ART	0	No TB	0			Active	3.41918
Hospital	115	14	140115006956545	2821		Adults >=15	Female	I or II	<100	1252	3.43014		IPT and ART	0	No TB	0			Active	3.43014
Hospital	49	07	7.0049e+13	2837		Adults >=15	Female	I or II	<100	1256	3.4411		IPT and ART	0	No TB	0			Active	3.4411
Hospital	117	14	140117007846981	2879		Adults >=15	Female	I or II	<100	1266	3.46849		IPT and ART	0	No TB	0			Active	3.46849
Hospital	59	14	140059006173786	2881		Adults >=15	Female	I or II	<100	1267	3.47123		IPT and ART	0	No TB	0			Active	3.47123
Hospital	117	14	140117008315566	2951		Adults >=15	Female	I or II	<100	1288	3.52877		IPT and ART	0	No TB	0			Active	3.52877
Hospital	59	14	140059007455298	3029		Adults >=15	Female	I or II	<100	1313	3.59726		IPT and ART	0	No TB	0			Active	3.59726
Hospital	59	14	140059007520776	3036		Adults >=15	Female	I or II	<100	1315	3.60274		IPT and ART	0	No TB	0			Active	3.60274
Hospital	51	07	70051006994850	3066		Adults >=15	Female	I or II	<100	1326	3.63288		IPT and ART	0	No TB	0			Active	3.63288
Hospital	59	14	140059007495542	3071		Adults >=15	Female	I or II	<100	1327	3.63562		IPT and ART	0	No TB	0			Active	3.63562
Hospital	117	14	140117008004366	3076		Adults >=15	Female	I or II	<100	1330	3.64384		IPT and ART	0	No TB	0			Active	3.64384
Hospital	176	07	7.0176e+13	3092		Adults >=15	Female	I or II	<100	1333	3.65205		IPT and ART	0	No TB	0			Active	3.65205
Hospital	59	14	140059007501634	3099		Adults >=15	Female	I or II	<100	1335	3.65753		IPT and ART	0	No TB	0			Active	3.65753
Hospital	59	14	140059007883069	3111		Adults >=15	Female	I or II	<100	1339	3.66849		IPT and ART	0	No TB	0			Active	3.66849
Hospital	59	14	140059006974479	3168		Adults >=15	Female	I or II	<100	1357	3.71781		IPT and ART	0	No TB	0			Active	3.71781
Hospital	59	14	140059007195187	3183		Adults >=15	Female	I or II	<100	1363	3.73425		IPT and ART	0	No TB	0			Active	3.73425
Hospital	117	14	140117008293550	3215		Adults >=15	Female	I or II	<100	1371	3.75616		IPT and ART	0	No TB	0			Active	3.75616
Hospital	59	14	140059007734121	3217		Adults >=15	Female	I or II	<100	1371	3.75616		IPT and ART	0	No TB	0			Active	3.75616
Hospital	117	14	140117008039157	3229		Adults >=15	Female	I or II	<100	1373	3.76164		IPT and ART	0	No TB	0			Active	3.76164
Hospital	21	12	120021007673688	3299		Adults >=15	Female	I or II	<100	1398	3.83014		IPT and ART	0	No TB	0			Active	3.83014
Hospital	117	14	140117007013915	3313		Adults >=15	Female	I or II	<100	1401	3.83836		IPT and ART	0	No TB	0			Active	3.83836
Hospital	115	14	140115007132498	3330		Adults >=15	Female	I or II	<100	1406	3.85205		IPT and ART	0	No TB	0			Active	3.85205
Hospital	59	14	140059007772753	3335		Adults >=15	Female	I or II	<100	1408	3.85753		IPT and ART	0	No TB	0			Active	3.85753
Hospital	21	12	120021007446002	3361		Adults >=15	Female	I or II	<100	1419	3.88767		IPT and ART	0	No TB	0			Active	3.88767
Hospital	49	07	7.0049e+13	3363		Adults >=15	Female	I or II	<100	1420	3.89041		IPT and ART	0	No TB	0			Active	3.89041
Hospital	117	14	140117002397895	3369		Adults >=15	Female	I or II	<100	1423	3.89863		IPT and ART	0	No TB	0			Active	3.89863
Hospital	110	07	7.011e+13	3414		Adults >=15	Female	I or II	<100	1439	3.94247		IPT and ART	0	No TB	0			Active	3.94247
Hospital	117	14	140117005105945	3440		Adults >=15	Female	I or II	<100	1448	3.96712		IPT and ART	0	No TB	0			Active	3.96712
Hospital	117	14	140117004127134	3447		Adults >=15	Female	I or II	<100	1450	3.9726		IPT and ART	0	No TB	0			Active	3.9726
Hospital	49	07	7.0049e+13	3461		Adults >=15	Female	I or II	<100	1456	3.98904		IPT and ART	0	No TB	0			Active	3.98904
Hospital	49	07	7.0049e+13	3477		Adults >=15	Female	I or II	<100	1462	4.00548		IPT and ART	0	No TB	0			Active	4.00548
Hospital	49	07	7.0049e+13	3482		Adults >=15	Female	I or II	<100	1463	4.00822		IPT and ART	0	No TB	0			Active	4.00822
Hospital	47	07	7.0047e+13	3495		Adults >=15	Female	I or II	<100	1465	4.0137		IPT and ART	0	No TB	0			Active	4.0137
Hospital	51	07	7.0051e+13	3503		Adults >=15	Female	I or II	<100	1468	4.02192		IPT and ART	0	No TB	0			Active	4.02192
Hospital	51	07	7.0051e+13	3506		Adults >=15	Female	I or II	<100	1468	4.02192		IPT and ART	0	No TB	0			Active	4.02192
Hospital	21	12	120021006893656	3529		Adults >=15	Female	I or II	<100	1476	4.04384		IPT and ART	0	No TB	0			Active	4.04384
Hospital	51	07	70051004574711	3535		Adults >=15	Female	I or II	<100	1478	4.04932		IPT and ART	0	No TB	0			Active	4.04932
Hospital	21	12	120021006113682	3552		Adults >=15	Female	I or II	<100	1488	4.07671		IPT and ART	0	No TB	0			Active	4.07671
Hospital	51	07	7.0051e+13	3578		Adults >=15	Female	I or II	<100	1499	4.10685		IPT and ART	0	No TB	0			Active	4.10685
Hospital	117	14	140117007210818	3589		Adults >=15	Female	I or II	<100	1502	4.11507		IPT and ART	0	No TB	0			Active	4.11507
Hospital	117	14	140117005323010	3619		Adults >=15	Female	I or II	<100	1511	4.13973		IPT and ART	0	No TB	0			Active	4.13973
Hospital	117	14	140117006042633	3650		Adults >=15	Female	I or II	<100	1522	4.16986		IPT and ART	0	No TB	0			Active	4.16986
Hospital	49	07	7.0049e+13	3660		Adults >=15	Female	I or II	<100	1527	4.18356		IPT and ART	0	No TB	0			Active	4.18356
Hospital	47	07	7.0047e+13	3736		Adults >=15	Female	I or II	<100	1547	4.23836		IPT and ART	0	No TB	0			Active	4.23836
Hospital	117	14	140117008236156	3800		Adults >=15	Female	I or II	<100	1574	4.31233		IPT and ART	0	No TB	0			Active	4.31233
Hospital	117	14	140117008269501	3802		Adults >=15	Female	I or II	<100	1575	4.31507		IPT and ART	0	No TB	0			Active	4.31507
Hospital	117	14	140117008060856	3823		Adults >=15	Female	I or II	<100	1583	4.33699		IPT and ART	0	No TB	0			Active	4.33699
Hospital	153	07	7.0153e+13	3827		Adults >=15	Female	I or II	<100	1587	4.34795		IPT and ART	0	No TB	0			Active	4.34795
Hospital	51	07	7.0051e+13	3837		Adults >=15	Female	I or II	<100	1592	4.36164		IPT and ART	0	No TB	0			Active	4.36164
Hospital	117	14	140117008000685	3874		Adults >=15	Female	I or II	<100	1605	4.39726		IPT and ART	0	No TB	0			Active	4.39726
Hospital	117	14	140117007477604	3898		Adults >=15	Female	I or II	<100	1615	4.42466		IPT and ART	0	No TB	0			Active	4.42466
Hospital	117	14	140117007198931	3909		Adults >=15	Female	I or II	<100	1618	4.43288		IPT and ART	0	No TB	0			Active	4.43288
Hospital	117	14	140117007787382	4000		Adults >=15	Female	I or II	<100	1652	4.52603		IPT and ART	0	No TB	0			Active	4.52603
Hospital	117	14	140117008051978	4027		Adults >=15	Female	I or II	<100	1661	4.55068		IPT and ART	0	No TB	0			Active	4.55068
Hospital	117	14	140117007530480	4045		Adults >=15	Female	I or II	<100	1668	4.56986		IPT and ART	0	No TB	0			Active	4.56986
Hospital	117	14	140117008227910	4056		Adults >=15	Female	I or II	<100	1672	4.58082		IPT and ART	0	No TB	0			Active	4.58082
Hospital	59	14	140059008130648	4101		Adults >=15	Female	I or II	<100	1686	4.61918		IPT and ART	0	No TB	0			Active	4.61918
Hospital	117	14	140117008116417	4109		Adults >=15	Female	I or II	<100	1690	4.63014		IPT and ART	0	No TB	0			Active	4.63014
Hospital	117	14	140117008222285	4118		Adults >=15	Female	I or II	<100	1694	4.6411		IPT and ART	0	No TB	0			Active	4.6411
Hospital	117	14	140117008240385	4136		Adults >=15	Female	I or II	<100	1703	4.66575		IPT and ART	0	No TB	0			Active	4.66575
Hospital	117	14	140117008071219	4148		Adults >=15	Female	I or II	<100	1707	4.67671		IPT and ART	0	No TB	0			Active	4.67671
Hospital	117	14	140117007742836	4196		Adults >=15	Female	I or II	<100	1739	4.76438		IPT and ART	0	No TB	0			Active	4.76438
Hospital	115	14	140115008346642	4299		Adults >=15	Female	I or II	<100	1975	5.41096		IPT and ART	0	No TB	0			Active	5.41096
Hospital	51	07	7.0051e+13	4331		Adults >=15	Female	I or II	<100	2049	5.6137		IPT and ART	0	No TB	0			Active	5.6137
Hospital	59	14	140059007911691	4405		Adults >=15	Female	I or II	<100	2245	6.15068		IPT and ART	0	No TB	0			Active	6.15068
Hospital	49	07	7.0049e+13	4481		Adults >=15	Female	I or II	<100	2661	7.29041		IPT and ART	0	No TB	0			TO	7.29041
Hospital	115	14	140115010348782	1015		Pediatric <15	Female	I or II	<100	513	1.40548		IPT and ART	0	No TB	0			DROP	1.40548
Hospital	115	14	140115010326105	1174		Pediatric <15	Female	I or II	<100	576	1.57808		IPT and ART	0	No TB	0			Active	1.57808
Hospital	115	14	140115010344223	1197		Pediatric <15	Female	I or II	<100	584	1.6		IPT and ART	0	No TB	0			Active	1.6
Hospital	115	14	140115010330616	1343		Pediatric <15	Female	I or II	<100	653	1.78904		IPT and ART	0	No TB	0			Active	1.78904
Hospital	115	14	140115010346281	1350		Pediatric <15	Female	I or II	<100	655	1.79452		IPT and ART	0	No TB	0			Active	1.79452
Hospital	115	14	140115010349487	1372		Pediatric <15	Female	I or II	<100	662	1.8137		IPT and ART	0	No TB	0			Active	1.8137
Hospital	115	14	140115010325285	1382		Pediatric <15	Female	I or II	<100	667	1.8274		IPT and ART	0	No TB	0			Active	1.8274
Hospital	115	14	140115010328298	1396		Pediatric <15	Female	I or II	<100	671	1.83836		IPT and ART	0	No TB	0			Active	1.83836
Hospital	115	14	140115010309186	1423		Pediatric <15	Female	I or II	<100	679	1.86027		IPT and ART	0	No TB	0			Active	1.86027
Hospital	115	14	140115010337573	1567		Pediatric <15	Female	I or II	<100	744	2.03836		IPT and ART	0	No TB	0			Active	2.03836
Hospital	115	14	140115010342387	1570		Pediatric <15	Female	I or II	<100	746	2.04384		IPT and ART	0	No TB	0			Active	2.04384
Hospital	115	14	140115010328330	1641		Pediatric <15	Female	I or II	<100	774	2.12055		IPT and ART	0	No TB	0			Active	2.12055
Hospital	59	14	140059008272060	6		Adults >=15	Male	III or IV	>349	3	0.00821918		IPT only	0	No TB	0				0.00821918
Hospital	21	12	120021007902487	10		Adults >=15	Female	III or IV	100-349	14	0.0383562		IPT only	0	No TB	0				0.0383562
Hospital	51	07	7.0051e+13	339		Adults >=15	Male	I or II	<100	184	0.50411		IPT and ART	0	No TB	0			TO	0.50411
Hospital	117	14	140117007401842	359		Adults >=15	Male	I or II	<100	195	0.534247		IPT and ART	0	No TB	0			TO	0.534247
Hospital	117	14	140117003891820	397		Adults >=15	Male	I or II	<100	214	0.586301		IPT and ART	0	No TB	0			DROP	0.586301
Hospital	117	14	140117008268475	432		Adults >=15	Male	I or II	<100	247	0.676712		IPT and ART	0	No TB	0			DEAD	0.676712
Hospital	21	12	120021008238008	441		Adults >=15	Male	I or II	<100	250	0.684932		IPT and ART	0	No TB	0			TO	0.684932
Hospital	21	12	120021007969012	444		Adults >=15	Male	I or II	<100	251	0.687671		IPT and ART	0	No TB	0			DROP	0.687671
Hospital	59	14	140059008123261	556		Adults >=15	Male	I or II	<100	308	0.843836		IPT and ART	0	No TB	0			DROP	0.843836
Hospital	21	12	120021008232440	589		Adults >=15	Male	I or II	<100	330	0.90411		IPT and ART	0	No TB	0			Active	0.90411
Hospital	49	07	7.0049e+13	665		Adults >=15	Male	I or II	<100	364	0.99726		IPT and ART	0	No TB	0			Active	0.99726
Hospital	59	14	140059008335431	693		Adults >=15	Male	I or II	<100	374	1.02466		IPT and ART	0	No TB	0			TO	1.02466
Hospital	117	14	140117006976348	716		Adults >=15	Male	I or II	<100	382	1.04658		IPT and ART	0	No TB	0			TO	1.04658
Hospital	153	07	7.0153e+13	746		Adults >=15	Male	I or II	<100	400	1.09589		IPT and ART	0	No TB	0			DEAD	1.09589
Hospital	59	14	140059007238497	749		Adults >=15	Male	I or II	<100	401	1.09863		IPT and ART	0	No TB	0			DEAD	1.09863
Hospital	59	14	140059008346168	865		Adults >=15	Male	I or II	<100	450	1.23288		IPT and ART	0	No TB	0			Active	1.23288
Hospital	21	12	120021007642044	897		Adults >=15	Male	I or II	<100	470	1.28767		IPT and ART	0	No TB	0			DROP	1.28767
Hospital	59	14	140059007814803	968		Adults >=15	Male	I or II	<100	502	1.37534		IPT and ART	0	No TB	0			DROP	1.37534
Hospital	271	07	7.0271e+13	1069		Adults >=15	Male	I or II	<100	530	1.45205		IPT and ART	0	No TB	0			Active	1.45205
Hospital	153	07	7.0153e+13	1242		Adults >=15	Male	I or II	<100	600	1.64384		IPT and ART	0	No TB	0			Active	1.64384
Hospital	49	07	7.0049e+13	1272		Adults >=15	Male	I or II	<100	613	1.67945		IPT and ART	0	No TB	0			DROP	1.67945
Hospital	115	14	140115007774436	1279		Adults >=15	Male	I or II	<100	620	1.69863		IPT and ART	0	No TB	0			TO	1.69863
Hospital	271	07	7.0271e+13	1417		Adults >=15	Male	I or II	<100	677	1.85479		IPT and ART	0	No TB	0			DROP	1.85479
Hospital	21	12	120021007708411	1530		Adults >=15	Male	I or II	<100	728	1.99452		IPT and ART	0	No TB	0			DEAD	1.99452
Hospital	51	07	7.0051e+13	1537		Adults >=15	Male	I or II	<100	730	2		IPT and ART	0	No TB	0			DEAD	2
Hospital	21	12	120021007682482	1549		Adults >=15	Male	I or II	<100	735	2.0137		IPT and ART	0	No TB	0			TO	2.0137
Hospital	49	07	7.0049e+13	1609		Adults >=15	Male	I or II	<100	757	2.07397		IPT and ART	0	No TB	0			DROP	2.07397
Hospital	153	07	7.0153e+13	1618		Adults >=15	Male	I or II	<100	763	2.09041		IPT and ART	0	No TB	0			Active	2.09041
Hospital	59	14	140059008186464	1682		Adults >=15	Male	I or II	<100	797	2.18356		IPT and ART	0	No TB	0			Active	2.18356
Hospital	51	07	7.0051e+13	1779		Adults >=15	Male	I or II	<100	844	2.31233		IPT and ART	0	No TB	0			TO	2.31233
Hospital	59	14	140059007852828	1824		Adults >=15	Male	I or II	<100	871	2.3863		IPT and ART	0	No TB	0			Active	2.3863
Hospital	51	07	70051007222566	1843		Adults >=15	Male	I or II	<100	882	2.41644		IPT and ART	0	No TB	0			Active	2.41644
Hospital	153	07	7.0153e+13	1889		Adults >=15	Male	I or II	<100	903	2.47397		IPT and ART	0	No TB	0			Active	2.47397
Hospital	49	07	7.0049e+13	1944		Adults >=15	Male	I or II	<100	933	2.55616		IPT and ART	0	No TB	0			Active	2.55616
Hospital	49	07	7.0049e+13	1988		Adults >=15	Male	I or II	<100	953	2.61096		IPT and ART	0	No TB	0			Active	2.61096
Hospital	21	12	120021007668094	2016		Adults >=15	Male	I or II	<100	962	2.63562		IPT and ART	0	No TB	0			TO	2.63562
Hospital	51	07	7.0051e+13	2085		Adults >=15	Male	I or II	<100	992	2.71781		IPT and ART	0	No TB	0			Active	2.71781
Hospital	59	14	140059007864036	2131		Adults >=15	Male	I or II	<100	1013	2.77534		IPT and ART	0	No TB	0			Active	2.77534
Hospital	117	14	140117008638171	2240		Adults >=15	Male	I or II	<100	1051	2.87945		IPT and ART	0	No TB	0			LOST	2.87945
Hospital	47	07	7.0047e+13	2250		Adults >=15	Male	I or II	<100	1054	2.88767		IPT and ART	0	No TB	0			Active	2.88767
Hospital	59	14	140059007918629	2254		Adults >=15	Male	I or II	<100	1055	2.89041		IPT and ART	0	No TB	0			Active	2.89041
Hospital	21	12	120021007950502	2289		Adults >=15	Male	I or II	<100	1064	2.91507		IPT and ART	0	No TB	0			Active	2.91507
Hospital	49	07	70049006961296	2315		Adults >=15	Male	I or II	<100	1073	2.93973		IPT and ART	0	No TB	0			Active	2.93973
Hospital	49	07	7.0049e+13	2428		Adults >=15	Male	I or II	<100	1113	3.04932		IPT and ART	0	No TB	0			Active	3.04932
Hospital	21	12	120021007294377	2442		Adults >=15	Male	I or II	<100	1118	3.06301		IPT and ART	0	No TB	0			DROP	3.06301
Hospital	49	07	7.0049e+13	2470		Adults >=15	Male	I or II	<100	1130	3.09589		IPT and ART	0	No TB	0			Active	3.09589
Hospital	110	07	70110006590301	2571		Adults >=15	Male	I or II	<100	1164	3.18904		IPT and ART	0	No TB	0			Active	3.18904
Hospital	21	12	120021007835184	2671		Adults >=15	Male	I or II	<100	1200	3.28767		IPT and ART	0	No TB	0			Active	3.28767
Hospital	59	14	140059007885329	2697		Adults >=15	Male	I or II	<100	1210	3.31507		IPT and ART	0	No TB	0			Active	3.31507
Hospital	59	14	140059007847372	2716		Adults >=15	Male	I or II	<100	1220	3.34247		IPT and ART	0	No TB	0			Active	3.34247
Hospital	59	14	140059007945910	2802		Adults >=15	Male	I or II	<100	1246	3.4137		IPT and ART	0	No TB	0			Active	3.4137
Hospital	153	07	70153005913503	2884		Adults >=15	Male	I or II	<100	1267	3.47123		IPT and ART	0	No TB	0			Active	3.47123
Hospital	59	14	140059007732808	2896		Adults >=15	Male	I or II	<100	1270	3.47945		IPT and ART	0	No TB	0			Active	3.47945
Hospital	49	07	7.0049e+13	2900		Adults >=15	Male	I or II	<100	1271	3.48219		IPT and ART	0	No TB	0			Active	3.48219
Hospital	59	14	140059008009695	2961		Adults >=15	Male	I or II	<100	1291	3.53699		IPT and ART	0	No TB	0			Active	3.53699
Hospital	176	07	7.0176e+13	2984		Adults >=15	Male	I or II	<100	1299	3.5589		IPT and ART	0	No TB	0			Active	3.5589
Hospital	51	07	70051006736967	3037		Adults >=15	Male	I or II	<100	1316	3.60548		IPT and ART	0	No TB	0			Active	3.60548
Hospital	115	14	140115006854355	3094		Adults >=15	Male	I or II	<100	1334	3.65479		IPT and ART	0	No TB	0			Active	3.65479
Hospital	59	14	140059007957877	3126		Adults >=15	Male	I or II	<100	1343	3.67945		IPT and ART	0	No TB	0			Active	3.67945
Hospital	21	12	120021007673223	3272		Adults >=15	Male	I or II	<100	1387	3.8		IPT and ART	0	No TB	0			LOST	3.8
Hospital	47	07	7.0047e+13	3288		Adults >=15	Male	I or II	<100	1394	3.81918		IPT and ART	0	No TB	0			Active	3.81918
Hospital	49	07	7.0049e+13	3360		Adults >=15	Male	I or II	<100	1419	3.88767		IPT and ART	0	No TB	0			TO	3.88767
Hospital	21	12	120021006726233	3441		Adults >=15	Male	I or II	<100	1448	3.96712		IPT and ART	0	No TB	0			Active	3.96712
Hospital	117	14	140117008300529	3446		Adults >=15	Male	I or II	<100	1450	3.9726		IPT and ART	0	No TB	0			Active	3.9726
Hospital	59	14	140059007687080	3487		Adults >=15	Male	I or II	<100	1464	4.01096		IPT and ART	0	No TB	0			Active	4.01096
Hospital	117	14	140117006063785	3524		Adults >=15	Male	I or II	<100	1475	4.0411		IPT and ART	0	No TB	0			Active	4.0411
Hospital	115	14	140115008511376	3585		Adults >=15	Male	I or II	<100	1501	4.11233		IPT and ART	0	No TB	0			Active	4.11233
Hospital	117	14	140117004330733	3700		Adults >=15	Male	I or II	<100	1536	4.20822		IPT and ART	0	No TB	0			TO	4.20822
Hospital	21	12	120021003044522	3778		Adults >=15	Male	I or II	<100	1560	4.27397		IPT and ART	0	No TB	0			Active	4.27397
Hospital	117	14	140117008216358	3828		Adults >=15	Male	I or II	<100	1587	4.34795		IPT and ART	0	No TB	0			Active	4.34795
Hospital	117	14	140117007492203	3870		Adults >=15	Male	I or II	<100	1604	4.39452		IPT and ART	0	No TB	0			Active	4.39452
Hospital	117	14	140117008193124	3890		Adults >=15	Male	I or II	<100	1612	4.41644		IPT and ART	0	No TB	0			Active	4.41644
Hospital	117	14	140117007493874	3910		Adults >=15	Male	I or II	<100	1619	4.43562		IPT and ART	0	No TB	0			Active	4.43562
Hospital	117	14	140117008117611	3914		Adults >=15	Male	I or II	<100	1620	4.43836		IPT and ART	0	No TB	0			Active	4.43836
Hospital	117	14	140117007560601	3921		Adults >=15	Male	I or II	<100	1622	4.44384		IPT and ART	0	No TB	0			Active	4.44384
Hospital	59	14	140059007763021	3941		Adults >=15	Male	I or II	<100	1632	4.47123		IPT and ART	0	No TB	0			Active	4.47123
Hospital	117	14	140117008235096	3967		Adults >=15	Male	I or II	<100	1642	4.49863		IPT and ART	0	No TB	0			Active	4.49863
Hospital	59	14	140059004919981	3987		Adults >=15	Male	I or II	<100	1648	4.51507		IPT and ART	0	No TB	0			Active	4.51507
Hospital	117	14	140117005655992	3989		Adults >=15	Male	I or II	<100	1650	4.52055		IPT and ART	0	No TB	0			Active	4.52055
Hospital	117	14	140117007639642	4040		Adults >=15	Male	I or II	<100	1667	4.56712		IPT and ART	0	No TB	0			Active	4.56712
Hospital	117	14	140117006124683	4064		Adults >=15	Male	I or II	<100	1675	4.58904		IPT and ART	0	No TB	0			LOST	4.58904
Hospital	117	14	140117007491645	4085		Adults >=15	Male	I or II	<100	1682	4.60822		IPT and ART	0	No TB	0			Active	4.60822
Hospital	117	14	140117006873164	4131		Adults >=15	Male	I or II	<100	1702	4.66301		IPT and ART	0	No TB	0			Active	4.66301
Hospital	117	14	140117008190077	4221		Adults >=15	Male	I or II	<100	1778	4.87123		IPT and ART	0	No TB	0			Active	4.87123
Hospital	49	07	7.0049e+13	4252		Adults >=15	Male	I or II	<100	1854	5.07945		IPT and ART	0	No TB	0			Active	5.07945
Hospital	115	14	140115007663408	4269		Adults >=15	Male	I or II	<100	1897	5.19726		IPT and ART	0	No TB	0			Active	5.19726
Hospital	115	14	140115008610684	4416		Adults >=15	Male	I or II	<100	2282	6.25205		IPT and ART	0	No TB	0			Active	6.25205
Hospital	47	07	7.0047e+13	980		Pediatric <15	Male	I or II	<100	504	1.38082		IPT and ART	0	No TB	0			Active	1.38082
Hospital	47	07	7.0047e+13	1039		Pediatric <15	Male	I or II	<100	520	1.42466		IPT and ART	0	No TB	0			Active	1.42466
Hospital	115	14	140115010311549	1267		Pediatric <15	Male	I or II	<100	611	1.67397		IPT and ART	0	No TB	0			Active	1.67397
Hospital	115	14	140115010311882	1616		Pediatric <15	Male	I or II	<100	761	2.08493		IPT and ART	0	No TB	0			Active	2.08493
Hospital	47	07	7.0047e+13	1683		Pediatric <15	Male	I or II	<100	797	2.18356		IPT and ART	0	No TB	0			Active	2.18356
Hospital	176	07	70176003912023	9		Adults >=15	Male	III or IV	100-349	14	0.0383562		IPT only	0	No TB	0				0.0383562
Hospital	176	07	7.0176e+13	11		Adults >=15	Male	III or IV	>349	18	0.0493151		IPT only	0	No TB	0				0.0493151
Hospital	21	12	120021008239593	12		Adults >=15	Male	III or IV	100-349	20	0.0547945		IPT only	0	No TB	0				0.0547945
Hospital	21	12	120021007653969	395		Adults >=15	Female	III or IV	<100	213	0.583562		IPT and ART	0	No TB	0			TO	0.583562
Hospital	176	07	7.0176e+13	431		Adults >=15	Female	III or IV	<100	245	0.671233		IPT and ART	0	No TB	0			Active	0.671233
Hospital	110	07	7.011e+13	460		Adults >=15	Female	III or IV	<100	261	0.715068		IPT and ART	0	No TB	0			TO	0.715068
Hospital	59	14	140059007952615	478		Adults >=15	Female	III or IV	<100	269	0.736986		IPT and ART	0	No TB	0			DROP	0.736986
Hospital	115	14	140115008803124	528		Adults >=15	Female	III or IV	<100	295	0.808219		IPT and ART	0	No TB	0			DROP	0.808219
Hospital	21	12	120021008033658	548		Adults >=15	Female	III or IV	<100	301	0.824658		IPT and ART	0	No TB	0			DEAD	0.824658
Hospital	271	07	7.0271e+13	611		Adults >=15	Female	III or IV	<100	338	0.926027		IPT and ART	0	No TB	0			Active	0.926027
Hospital	49	07	7.0049e+13	632		Adults >=15	Female	III or IV	<100	351	0.961644		IPT and ART	0	No TB	0			DROP	0.961644
Hospital	271	07	7.0271e+13	637		Adults >=15	Female	III or IV	<100	353	0.967123		IPT and ART	0	No TB	0			Active	0.967123
Hospital	21	12	120021007675082	677		Adults >=15	Female	III or IV	<100	366	1.00274		IPT and ART	0	No TB	0			DEAD	1.00274
Hospital	59	14	140059008246172	722		Adults >=15	Female	III or IV	<100	387	1.06027		IPT and ART	0	No TB	0			Active	1.06027
Hospital	59	14	140059007711101	761		Adults >=15	Female	III or IV	<100	408	1.11781		IPT and ART	0	No TB	0			Active	1.11781
Hospital	59	14	140059007794411	828		Adults >=15	Female	III or IV	<100	435	1.19178		IPT and ART	0	No TB	0			DROP	1.19178
Hospital	59	14	140059007790696	832		Adults >=15	Female	III or IV	<100	436	1.19452		IPT and ART	0	No TB	0			TO	1.19452
Hospital	59	14	140059008349484	848		Adults >=15	Female	III or IV	<100	443	1.2137		IPT and ART	0	No TB	0			Active	1.2137
Hospital	271	07	7.0271e+13	866		Adults >=15	Female	III or IV	<100	450	1.23288		IPT and ART	0	No TB	0			Active	1.23288
Hospital	176	07	7.0176e+13	868		Adults >=15	Female	III or IV	<100	451	1.23562		IPT and ART	0	No TB	0			Active	1.23562
Hospital	49	07	7.0049e+13	886		Adults >=15	Female	III or IV	<100	464	1.27123		IPT and ART	0	No TB	0			DROP	1.27123
Hospital	21	12	120021006716595	923		Adults >=15	Female	III or IV	<100	483	1.32329		IPT and ART	0	No TB	0			TO	1.32329
Hospital	21	12	120021007896925	1050		Adults >=15	Female	III or IV	<100	523	1.43288		IPT and ART	0	No TB	0			DROP	1.43288
Hospital	59	14	140059008485496	1085		Adults >=15	Female	III or IV	<100	537	1.47123		IPT and ART	0	No TB	0			Active	1.47123
Hospital	51	07	70051007226209	1087		Adults >=15	Female	III or IV	<100	539	1.47671		IPT and ART	0	No TB	0			TO	1.47671
Hospital	117	14	140117007010312	1106		Adults >=15	Female	III or IV	<100	547	1.49863		IPT and ART	0	No TB	0			DROP	1.49863
Hospital	59	14	140059005916202	1178		Adults >=15	Female	III or IV	<100	577	1.58082		IPT and ART	0	No TB	0			Active	1.58082
Hospital	21	12	120021006045005	1198		Adults >=15	Female	III or IV	<100	585	1.60274		IPT and ART	0	No TB	0			DEAD	1.60274
Hospital	117	14	140117006859615	1244		Adults >=15	Female	III or IV	<100	600	1.64384		IPT and ART	0	No TB	0			Active	1.64384
Hospital	271	07	7.0271e+13	1278		Adults >=15	Female	III or IV	<100	620	1.69863		IPT and ART	0	No TB	0			Active	1.69863
Hospital	59	14	140059008264363	1290		Adults >=15	Female	III or IV	<100	629	1.72329		IPT and ART	0	No TB	0			Active	1.72329
Hospital	59	14	140059007019297	1395		Adults >=15	Female	III or IV	<100	671	1.83836		IPT and ART	0	No TB	0			DROP	1.83836
Hospital	117	14	140117008040447	1451		Adults >=15	Female	III or IV	<100	691	1.89315		IPT and ART	0	No TB	0			Active	1.89315
Hospital	59	14	140059007726654	1464		Adults >=15	Female	III or IV	<100	695	1.90411		IPT and ART	0	No TB	0			Active	1.90411
Hospital	59	14	140059007926242	1501		Adults >=15	Female	III or IV	<100	710	1.94521		IPT and ART	0	No TB	0			LOST	1.94521
Hospital	51	07	7.0051e+13	1555		Adults >=15	Female	III or IV	<100	739	2.02466		IPT and ART	0	No TB	0			DROP	2.02466
Hospital	117	14	140117007640604	1559		Adults >=15	Female	III or IV	<100	740	2.0274		IPT and ART	0	No TB	0			TO	2.0274
Hospital	59	14	140059007096721	1575		Adults >=15	Female	III or IV	<100	747	2.04658		IPT and ART	0	No TB	0			DEAD	2.04658
Hospital	115	14	140115007870166	1577		Adults >=15	Female	III or IV	<100	748	2.04932		IPT and ART	0	No TB	0			Active	2.04932
Hospital	115	14	140115006914731	1580		Adults >=15	Female	III or IV	<100	748	2.04932		IPT and ART	0	No TB	0			Active	2.04932
Hospital	115	14	140115009286097	1620		Adults >=15	Female	III or IV	<100	764	2.09315		IPT and ART	0	No TB	0			Active	2.09315
Hospital	59	14	140059008148156	1663		Adults >=15	Female	III or IV	<100	786	2.15342		IPT and ART	0	No TB	0			Active	2.15342
Hospital	59	14	140059007954372	1684		Adults >=15	Female	III or IV	<100	798	2.1863		IPT and ART	0	No TB	0			TO	2.1863
Hospital	21	12	120021007142827	1697		Adults >=15	Female	III or IV	<100	803	2.2		IPT and ART	0	No TB	0			TO	2.2
Hospital	153	07	7.0153e+13	1717		Adults >=15	Female	III or IV	<100	812	2.22466		IPT and ART	0	No TB	0			Active	2.22466
Hospital	51	07	7.0051e+13	1730		Adults >=15	Female	III or IV	<100	820	2.24658		IPT and ART	0	No TB	0			TO	2.24658
Hospital	21	12	120021005609472	1749		Adults >=15	Female	III or IV	<100	829	2.27123		IPT and ART	0	No TB	0			TO	2.27123
Hospital	153	07	70153005710427	1776		Adults >=15	Female	III or IV	<100	842	2.30685		IPT and ART	0	No TB	0			Active	2.30685
Hospital	59	14	140059008056110	1818		Adults >=15	Female	III or IV	<100	865	2.36986		IPT and ART	0	No TB	0			Active	2.36986
Hospital	59	14	140059007407924	1868		Adults >=15	Female	III or IV	<100	893	2.44658		IPT and ART	0	No TB	0			Active	2.44658
Hospital	117	14	140117007420579	1874		Adults >=15	Female	III or IV	<100	896	2.45479		IPT and ART	0	No TB	0			Active	2.45479
Hospital	176	07	7.0176e+13	1884		Adults >=15	Female	III or IV	<100	901	2.46849		IPT and ART	0	No TB	0			Active	2.46849
Hospital	51	07	7.0051e+13	1916		Adults >=15	Female	III or IV	<100	922	2.52603		IPT and ART	0	No TB	0			DEAD	2.52603
Hospital	59	14	140059007452402	1930		Adults >=15	Female	III or IV	<100	927	2.53973		IPT and ART	0	No TB	0			Active	2.53973
Hospital	153	07	7.0153e+13	1938		Adults >=15	Female	III or IV	<100	931	2.55068		IPT and ART	0	No TB	0			Active	2.55068
Hospital	115	14	140115008035603	1940		Adults >=15	Female	III or IV	<100	932	2.55342		IPT and ART	0	No TB	0			Active	2.55342
Hospital	49	07	7.0049e+13	1992		Adults >=15	Female	III or IV	<100	954	2.6137		IPT and ART	0	No TB	0			Active	2.6137
Hospital	49	07	7.0049e+13	1998		Adults >=15	Female	III or IV	<100	955	2.61644		IPT and ART	0	No TB	0			Active	2.61644
Hospital	47	07	7.0047e+13	2019		Adults >=15	Female	III or IV	<100	964	2.6411		IPT and ART	0	No TB	0			Active	2.6411
Hospital	59	14	140059005852202	2030		Adults >=15	Female	III or IV	<100	969	2.65479		IPT and ART	0	No TB	0			Active	2.65479
Hospital	21	12	120021007028201	2053		Adults >=15	Female	III or IV	<100	981	2.68767		IPT and ART	0	No TB	0			TO	2.68767
Hospital	51	07	7.0051e+13	2054		Adults >=15	Female	III or IV	<100	981	2.68767		IPT and ART	0	No TB	0			Active	2.68767
Hospital	59	14	140059008169620	2062		Adults >=15	Female	III or IV	<100	984	2.69589		IPT and ART	0	No TB	0			Active	2.69589
Hospital	51	07	7.0051e+13	2084		Adults >=15	Female	III or IV	<100	992	2.71781		IPT and ART	0	No TB	0			Active	2.71781
Hospital	49	07	7.0049e+13	2095		Adults >=15	Female	III or IV	<100	996	2.72877		IPT and ART	0	No TB	0			Active	2.72877
Hospital	49	07	7.0049e+13	2109		Adults >=15	Female	III or IV	<100	1002	2.74521		IPT and ART	0	No TB	0			Active	2.74521
Hospital	117	14	140117007162398	2114		Adults >=15	Female	III or IV	<100	1008	2.76164		IPT and ART	0	No TB	0			Active	2.76164
Hospital	117	14	140117006695799	2117		Adults >=15	Female	III or IV	<100	1009	2.76438		IPT and ART	0	No TB	0			Active	2.76438
Hospital	49	07	7.0049e+13	2120		Adults >=15	Female	III or IV	<100	1010	2.76712		IPT and ART	0	No TB	0			Active	2.76712
Hospital	117	14	140117007342132	2136		Adults >=15	Female	III or IV	<100	1014	2.77808		IPT and ART	0	No TB	0			Active	2.77808
Hospital	110	07	70110006645091	2137		Adults >=15	Female	III or IV	<100	1014	2.77808		IPT and ART	0	No TB	0			Active	2.77808
Hospital	59	14	140059007458186	2159		Adults >=15	Female	III or IV	<100	1021	2.79726		IPT and ART	0	No TB	0			Active	2.79726
Hospital	51	07	7.0051e+13	2174		Adults >=15	Female	III or IV	<100	1025	2.80822		IPT and ART	0	No TB	0			Active	2.80822
Hospital	49	07	7.0049e+13	2179		Adults >=15	Female	III or IV	<100	1026	2.81096		IPT and ART	0	No TB	0			Active	2.81096
Hospital	59	14	140059008517993	2186		Adults >=15	Female	III or IV	<100	1029	2.81918		IPT and ART	0	No TB	0			Active	2.81918
Hospital	117	14	140117007732369	2190		Adults >=15	Female	III or IV	<100	1030	2.82192		IPT and ART	0	No TB	0			Active	2.82192
Hospital	51	07	70051007179308	2195		Adults >=15	Female	III or IV	<100	1032	2.8274		IPT and ART	0	No TB	0			Active	2.8274
Hospital	59	14	140059007955074	2211		Adults >=15	Female	III or IV	<100	1039	2.84658		IPT and ART	0	No TB	0			Active	2.84658
Hospital	59	14	140059007982758	2225		Adults >=15	Female	III or IV	<100	1045	2.86301		IPT and ART	0	No TB	0			Active	2.86301
Hospital	59	14	140059007754910	2262		Adults >=15	Female	III or IV	<100	1057	2.89589		IPT and ART	0	No TB	0			Active	2.89589
Hospital	21	12	120021007931285	2263		Adults >=15	Female	III or IV	<100	1058	2.89863		IPT and ART	0	No TB	0			Active	2.89863
Hospital	51	07	7.0051e+13	2273		Adults >=15	Female	III or IV	<100	1061	2.90685		IPT and ART	0	No TB	0			Active	2.90685
Hospital	21	12	120021007946264	2296		Adults >=15	Female	III or IV	<100	1066	2.92055		IPT and ART	0	No TB	0			Active	2.92055
Hospital	59	14	140059008040769	2303		Adults >=15	Female	III or IV	<100	1069	2.92877		IPT and ART	0	No TB	0			Active	2.92877
Hospital	51	07	7.0051e+13	2340		Adults >=15	Female	III or IV	<100	1081	2.96164		IPT and ART	0	No TB	0			Active	2.96164
Hospital	115	14	140115009327323	2363		Adults >=15	Female	III or IV	<100	1088	2.98082		IPT and ART	0	No TB	0			Active	2.98082
Hospital	59	14	140059006761573	2379		Adults >=15	Female	III or IV	<100	1094	2.99726		IPT and ART	0	No TB	0			Active	2.99726
Hospital	59	14	140059008019942	2388		Adults >=15	Female	III or IV	<100	1098	3.00822		IPT and ART	0	No TB	0			Active	3.00822
Hospital	59	14	140059007803027	2389		Adults >=15	Female	III or IV	<100	1098	3.00822		IPT and ART	0	No TB	0			Active	3.00822
Hospital	47	07	7.0047e+13	2394		Adults >=15	Female	III or IV	<100	1101	3.01644		IPT and ART	0	No TB	0			Active	3.01644
Hospital	21	12	120021007842671	2407		Adults >=15	Female	III or IV	<100	1105	3.0274		IPT and ART	0	No TB	0			Active	3.0274
Hospital	59	14	140059007267525	2427		Adults >=15	Female	III or IV	<100	1112	3.04658		IPT and ART	0	No TB	0			Active	3.04658
Hospital	21	12	120021007906547	2430		Adults >=15	Female	III or IV	<100	1113	3.04932		IPT and ART	0	No TB	0			Active	3.04932
Hospital	110	07	7.011e+13	2451		Adults >=15	Female	III or IV	<100	1122	3.07397		IPT and ART	0	No TB	0			Active	3.07397
Hospital	21	12	120021007886457	2453		Adults >=15	Female	III or IV	<100	1123	3.07671		IPT and ART	0	No TB	0			LOST	3.07671
Hospital	59	14	140059007191429	2459		Adults >=15	Female	III or IV	<100	1126	3.08493		IPT and ART	0	No TB	0			DROP	3.08493
Hospital	117	14	140117007135687	2462		Adults >=15	Female	III or IV	<100	1127	3.08767		IPT and ART	0	No TB	0			Active	3.08767
Hospital	59	14	140059007192934	2466		Adults >=15	Female	III or IV	<100	1129	3.09315		IPT and ART	0	No TB	0			Active	3.09315
Hospital	115	14	140115009314430	2467		Adults >=15	Female	III or IV	<100	1129	3.09315		IPT and ART	0	No TB	0			Active	3.09315
Hospital	117	14	140117005455321	2479		Adults >=15	Female	III or IV	<100	1134	3.10685		IPT and ART	0	No TB	0			Active	3.10685
Hospital	59	14	140059004859812	2495		Adults >=15	Female	III or IV	<100	1138	3.11781		IPT and ART	0	No TB	0			Active	3.11781
Hospital	59	14	140059007978654	2507		Adults >=15	Female	III or IV	<100	1142	3.12877		IPT and ART	0	No TB	0			Active	3.12877
Hospital	49	07	7.0049e+13	2520		Adults >=15	Female	III or IV	<100	1146	3.13973		IPT and ART	0	No TB	0			Active	3.13973
Hospital	21	12	120021007346655	2526		Adults >=15	Female	III or IV	<100	1149	3.14795		IPT and ART	0	No TB	0			Active	3.14795
Hospital	59	14	140059008169336	2548		Adults >=15	Female	III or IV	<100	1156	3.16712		IPT and ART	0	No TB	0			Active	3.16712
Hospital	117	14	140117007019297	2566		Adults >=15	Female	III or IV	<100	1162	3.18356		IPT and ART	0	No TB	0			Active	3.18356
Hospital	59	14	140059006421622	2575		Adults >=15	Female	III or IV	<100	1165	3.19178		IPT and ART	0	No TB	0			Active	3.19178
Hospital	117	14	140117007952967	2581		Adults >=15	Female	III or IV	<100	1167	3.19726		IPT and ART	0	No TB	0			Active	3.19726
Hospital	59	14	140059006608001	2585		Adults >=15	Female	III or IV	<100	1168	3.2		IPT and ART	0	No TB	0			Active	3.2
Hospital	59	14	140059008029107	2594		Adults >=15	Female	III or IV	<100	1171	3.20822		IPT and ART	0	No TB	0			Active	3.20822
Hospital	59	14	140059004615121	2603		Adults >=15	Female	III or IV	<100	1175	3.21918		IPT and ART	0	No TB	0			Active	3.21918
Hospital	153	07	7.0153e+13	2605		Adults >=15	Female	III or IV	<100	1176	3.22192		IPT and ART	0	No TB	0			Active	3.22192
Hospital	59	14	140059005655992	2628		Adults >=15	Female	III or IV	<100	1182	3.23836		IPT and ART	0	No TB	0			Active	3.23836
Hospital	59	14	140059007984463	2634		Adults >=15	Female	III or IV	<100	1184	3.24384		IPT and ART	0	No TB	0			Active	3.24384
Hospital	59	14	140059007746733	2652		Adults >=15	Female	III or IV	<100	1191	3.26301		IPT and ART	0	No TB	0			Active	3.26301
Hospital	21	12	120021007581720	2662		Adults >=15	Female	III or IV	<100	1196	3.27671		IPT and ART	0	No TB	0			TO	3.27671
Hospital	59	14	140059007993620	2666		Adults >=15	Female	III or IV	<100	1198	3.28219		IPT and ART	0	No TB	0			Active	3.28219
Hospital	49	07	7.0049e+13	2674		Adults >=15	Female	III or IV	<100	1201	3.29041		IPT and ART	0	No TB	0			Active	3.29041
Hospital	59	14	140059008190077	2681		Adults >=15	Female	III or IV	<100	1203	3.29589		IPT and ART	0	No TB	0			Active	3.29589
Hospital	59	14	140059006284134	2686		Adults >=15	Female	III or IV	<100	1205	3.30137		IPT and ART	0	No TB	0			Active	3.30137
Hospital	59	14	140059003663562	2691		Adults >=15	Female	III or IV	<100	1207	3.30685		IPT and ART	0	No TB	0			Active	3.30685
Hospital	59	14	140059007350516	2710		Adults >=15	Female	III or IV	<100	1215	3.32877		IPT and ART	0	No TB	0			Active	3.32877
Hospital	59	14	140059004521789	2713		Adults >=15	Female	III or IV	<100	1219	3.33973		IPT and ART	0	No TB	0			Active	3.33973
Hospital	59	14	140059007130899	2726		Adults >=15	Female	III or IV	<100	1226	3.3589		IPT and ART	0	No TB	0			Active	3.3589
Hospital	59	14	140059006186209	2735		Adults >=15	Female	III or IV	<100	1227	3.36164		IPT and ART	0	No TB	0			Active	3.36164
Hospital	59	14	140059007388328	2736		Adults >=15	Female	III or IV	<100	1227	3.36164		IPT and ART	0	No TB	0			Active	3.36164
Hospital	59	14	140059005488938	2740		Adults >=15	Female	III or IV	<100	1228	3.36438		IPT and ART	0	No TB	0			Active	3.36438
Hospital	117	14	140117007924072	2750		Adults >=15	Female	III or IV	<100	1233	3.37808		IPT and ART	0	No TB	0			Active	3.37808
Hospital	59	14	140059007020191	2751		Adults >=15	Female	III or IV	<100	1233	3.37808		IPT and ART	0	No TB	0			Active	3.37808
Hospital	21	12	120021004007333	2752		Adults >=15	Female	III or IV	<100	1233	3.37808		IPT and ART	0	No TB	0			TO	3.37808
Hospital	59	14	140059007593878	2761		Adults >=15	Female	III or IV	<100	1235	3.38356		IPT and ART	0	No TB	0			Active	3.38356
Hospital	59	14	140059007679251	2770		Adults >=15	Female	III or IV	<100	1237	3.38904		IPT and ART	0	No TB	0			Active	3.38904
Hospital	115	14	140115009221181	2771		Adults >=15	Female	III or IV	<100	1238	3.39178		IPT and ART	0	No TB	0			Active	3.39178
Hospital	59	14	140059002079442	2787		Adults >=15	Female	III or IV	<100	1241	3.4		IPT and ART	0	No TB	0			Active	3.4
Hospital	21	12	120021006538140	2788		Adults >=15	Female	III or IV	<100	1242	3.40274		IPT and ART	0	No TB	0			Active	3.40274
Hospital	59	14	140059008102889	2823		Adults >=15	Female	III or IV	<100	1252	3.43014		IPT and ART	0	No TB	0			Active	3.43014
Hospital	59	14	140059006543912	2834		Adults >=15	Female	III or IV	<100	1255	3.43836		IPT and ART	0	No TB	0			Active	3.43836
Hospital	59	14	140059007518064	2855		Adults >=15	Female	III or IV	<100	1259	3.44932		IPT and ART	0	No TB	0			Active	3.44932
Hospital	49	07	7.0049e+13	2864		Adults >=15	Female	III or IV	<100	1261	3.45479		IPT and ART	0	No TB	0			Active	3.45479
Hospital	21	12	120021006864848	2887		Adults >=15	Female	III or IV	<100	1267	3.47123		IPT and ART	0	No TB	0			Active	3.47123
Hospital	59	14	140059007550661	2899		Adults >=15	Female	III or IV	<100	1271	3.48219		IPT and ART	0	No TB	0			Active	3.48219
Hospital	21	12	120021007060476	2925		Adults >=15	Female	III or IV	<100	1278	3.50137		IPT and ART	0	No TB	0			Active	3.50137
Hospital	110	07	7.011e+13	2928		Adults >=15	Female	III or IV	<100	1279	3.50411		IPT and ART	0	No TB	0			Active	3.50411
Hospital	21	12	120021007380879	2933		Adults >=15	Female	III or IV	<100	1282	3.51233		IPT and ART	0	No TB	0			Active	3.51233
Hospital	110	07	7.011e+13	2954		Adults >=15	Female	III or IV	<100	1290	3.53425		IPT and ART	0	No TB	0			Active	3.53425
Hospital	115	14	140115005720312	2966		Adults >=15	Female	III or IV	<100	1292	3.53973		IPT and ART	0	No TB	0			Active	3.53973
Hospital	59	14	140059005062595	2982		Adults >=15	Female	III or IV	<100	1298	3.55616		IPT and ART	0	No TB	0			Active	3.55616
Hospital	59	14	140059006548219	2983		Adults >=15	Female	III or IV	<100	1298	3.55616		IPT and ART	0	No TB	0			Active	3.55616
Hospital	117	14	140117007688913	3005		Adults >=15	Female	III or IV	<100	1307	3.58082		IPT and ART	0	No TB	0			Active	3.58082
Hospital	59	14	140059005811141	3012		Adults >=15	Female	III or IV	<100	1309	3.5863		IPT and ART	0	No TB	0			Active	3.5863
Hospital	117	14	140117006359574	3017		Adults >=15	Female	III or IV	<100	1311	3.59178		IPT and ART	0	No TB	0			Active	3.59178
Hospital	115	14	140115008702510	3019		Adults >=15	Female	III or IV	<100	1312	3.59452		IPT and ART	0	No TB	0			Active	3.59452
Hospital	59	14	140059006415097	3024		Adults >=15	Female	III or IV	<100	1313	3.59726		IPT and ART	0	No TB	0			Active	3.59726
Hospital	21	12	120021007307873	3040		Adults >=15	Female	III or IV	<100	1317	3.60822		IPT and ART	0	No TB	0			Active	3.60822
Hospital	117	14	140117008165932	3041		Adults >=15	Female	III or IV	<100	1318	3.61096		IPT and ART	0	No TB	0			Active	3.61096
Hospital	117	14	140117005220356	3050		Adults >=15	Female	III or IV	<100	1320	3.61644		IPT and ART	0	No TB	0			Active	3.61644
Hospital	59	14	140059006951772	3056		Adults >=15	Female	III or IV	<100	1323	3.62466		IPT and ART	0	No TB	0			Active	3.62466
Hospital	21	12	120021007752765	3074		Adults >=15	Female	III or IV	<100	1329	3.6411		IPT and ART	0	No TB	0			Active	3.6411
Hospital	21	12	120021005587249	3128		Adults >=15	Female	III or IV	<100	1344	3.68219		IPT and ART	0	No TB	0			Active	3.68219
Hospital	21	12	120021007140453	3129		Adults >=15	Female	III or IV	<100	1344	3.68219		IPT and ART	0	No TB	0			Active	3.68219
Hospital	117	14	140117007905442	3132		Adults >=15	Female	III or IV	<100	1346	3.68767		IPT and ART	0	No TB	0			Active	3.68767
Hospital	21	12	120021007570443	3138		Adults >=15	Female	III or IV	<100	1348	3.69315		IPT and ART	0	No TB	0			Active	3.69315
Hospital	21	12	120021006753438	3142		Adults >=15	Female	III or IV	<100	1348	3.69315		IPT and ART	0	No TB	0			Active	3.69315
Hospital	59	14	140059008050703	3152		Adults >=15	Female	III or IV	<100	1352	3.70411		IPT and ART	0	No TB	0			Active	3.70411
Hospital	117	14	140117007239215	3154		Adults >=15	Female	III or IV	<100	1352	3.70411		IPT and ART	0	No TB	0			Active	3.70411
Hospital	117	14	140117007744570	3164		Adults >=15	Female	III or IV	<100	1355	3.71233		IPT and ART	0	No TB	0			TO	3.71233
Hospital	21	12	120021006345636	3172		Adults >=15	Female	III or IV	<100	1358	3.72055		IPT and ART	0	No TB	0			Active	3.72055
Hospital	21	12	120021004644391	3176		Adults >=15	Female	III or IV	<100	1360	3.72603		IPT and ART	0	No TB	0			TO	3.72603
Hospital	21	12	120021006508769	3187		Adults >=15	Female	III or IV	<100	1364	3.73699		IPT and ART	0	No TB	0			Active	3.73699
Hospital	115	14	140115008578665	3222		Adults >=15	Female	III or IV	<100	1371	3.75616		IPT and ART	0	No TB	0			Active	3.75616
Hospital	21	12	120021007553811	3234		Adults >=15	Female	III or IV	<100	1375	3.76712		IPT and ART	0	No TB	0			Active	3.76712
Hospital	117	14	140117006903747	3238		Adults >=15	Female	III or IV	<100	1375	3.76712		IPT and ART	0	No TB	0			DROP	3.76712
Hospital	117	14	140117007748460	3297		Adults >=15	Female	III or IV	<100	1397	3.8274		IPT and ART	0	No TB	0			Active	3.8274
Hospital	59	14	140059007218910	3302		Adults >=15	Female	III or IV	<100	1399	3.83288		IPT and ART	0	No TB	0			Active	3.83288
Hospital	117	14	140117008307953	3318		Adults >=15	Female	III or IV	<100	1403	3.84384		IPT and ART	0	No TB	0			Active	3.84384
Hospital	59	14	140059007948032	3320		Adults >=15	Female	III or IV	<100	1404	3.84658		IPT and ART	0	No TB	0			Active	3.84658
Hospital	117	14	140117008066835	3332		Adults >=15	Female	III or IV	<100	1406	3.85205		IPT and ART	0	No TB	0			Active	3.85205
Hospital	59	14	140059008127995	3342		Adults >=15	Female	III or IV	<100	1410	3.86301		IPT and ART	0	No TB	0			Active	3.86301
Hospital	51	07	7.0051e+13	3347		Adults >=15	Female	III or IV	<100	1412	3.86849		IPT and ART	0	No TB	0			Active	3.86849
Hospital	117	14	140117006400257	3391		Adults >=15	Female	III or IV	<100	1431	3.92055		IPT and ART	0	No TB	0			Active	3.92055
Hospital	21	12	120021006735780	3432		Adults >=15	Female	III or IV	<100	1445	3.9589		IPT and ART	0	No TB	0			Active	3.9589
Hospital	117	14	140117007427144	3434		Adults >=15	Female	III or IV	<100	1446	3.96164		IPT and ART	0	No TB	0			Active	3.96164
Hospital	117	14	140117007199678	3469		Adults >=15	Female	III or IV	<100	1460	4		IPT and ART	0	No TB	0			Active	4
Hospital	117	14	140117004394449	3473		Adults >=15	Female	III or IV	<100	1461	4.00274		IPT and ART	0	No TB	0			Active	4.00274
Hospital	21	12	120021005141664	3491		Adults >=15	Female	III or IV	<100	1464	4.01096		IPT and ART	0	No TB	0			Active	4.01096
Hospital	21	12	120021007202661	3497		Adults >=15	Female	III or IV	<100	1466	4.01644		IPT and ART	0	No TB	0			Active	4.01644
Hospital	59	14	140059007996654	3501		Adults >=15	Female	III or IV	<100	1467	4.01918		IPT and ART	0	No TB	0			Active	4.01918
Hospital	117	14	140117007839132	3509		Adults >=15	Female	III or IV	<100	1468	4.02192		IPT and ART	0	No TB	0			Active	4.02192
Hospital	117	14	140117007141245	3523		Adults >=15	Female	III or IV	<100	1475	4.0411		IPT and ART	0	No TB	0			Active	4.0411
Hospital	117	14	140117008286269	3544		Adults >=15	Female	III or IV	<100	1486	4.07123		IPT and ART	0	No TB	0			Active	4.07123
Hospital	51	07	7.0051e+13	3545		Adults >=15	Female	III or IV	<100	1486	4.07123		IPT and ART	0	No TB	0			Active	4.07123
Hospital	117	14	140117005733341	3548		Adults >=15	Female	III or IV	<100	1487	4.07397		IPT and ART	0	No TB	0			Active	4.07397
Hospital	21	12	120021007545390	3551		Adults >=15	Female	III or IV	<100	1488	4.07671		IPT and ART	0	No TB	0			Active	4.07671
Hospital	115	14	140115008928243	3554		Adults >=15	Female	III or IV	<100	1489	4.07945		IPT and ART	0	No TB	0			Active	4.07945
Hospital	117	14	140117008252185	3555		Adults >=15	Female	III or IV	<100	1489	4.07945		IPT and ART	0	No TB	0			Active	4.07945
Hospital	21	12	120021007510978	3565		Adults >=15	Female	III or IV	<100	1493	4.09041		IPT and ART	0	No TB	0			Active	4.09041
Hospital	21	12	120021006734592	3587		Adults >=15	Female	III or IV	<100	1501	4.11233		IPT and ART	0	No TB	0			Active	4.11233
Hospital	117	14	140117008092545	3592		Adults >=15	Female	III or IV	<100	1503	4.11781		IPT and ART	0	No TB	0			Active	4.11781
Hospital	110	07	7.011e+13	3597		Adults >=15	Female	III or IV	<100	1504	4.12055		IPT and ART	0	No TB	0			TO	4.12055
Hospital	115	14	140115008683385	3602		Adults >=15	Female	III or IV	<100	1507	4.12877		IPT and ART	0	No TB	0			Active	4.12877
Hospital	117	14	140117007708860	3609		Adults >=15	Female	III or IV	<100	1508	4.13151		IPT and ART	0	No TB	0			TO	4.13151
Hospital	115	14	140115007357556	3610		Adults >=15	Female	III or IV	<100	1508	4.13151		IPT and ART	0	No TB	0			Active	4.13151
Hospital	21	12	120021006814543	3611		Adults >=15	Female	III or IV	<100	1508	4.13151		IPT and ART	0	No TB	0			Active	4.13151
Hospital	117	14	140117008182000	3628		Adults >=15	Female	III or IV	<100	1515	4.15068		IPT and ART	0	No TB	0			Active	4.15068
Hospital	21	12	120021006648985	3638		Adults >=15	Female	III or IV	<100	1519	4.16164		IPT and ART	0	No TB	0			Active	4.16164
Hospital	21	12	120021007395722	3639		Adults >=15	Female	III or IV	<100	1519	4.16164		IPT and ART	0	No TB	0			Active	4.16164
Hospital	59	14	140059006261492	3648		Adults >=15	Female	III or IV	<100	1521	4.16712		IPT and ART	0	No TB	0			Active	4.16712
Hospital	21	12	120021007416980	3652		Adults >=15	Female	III or IV	<100	1522	4.16986		IPT and ART	0	No TB	0			Active	4.16986
Hospital	117	14	140117007254178	3659		Adults >=15	Female	III or IV	<100	1526	4.18082		IPT and ART	0	No TB	0			Active	4.18082
Hospital	117	14	140117007511525	3668		Adults >=15	Female	III or IV	<100	1528	4.1863		IPT and ART	0	No TB	0			LOST	4.1863
Hospital	110	07	7.011e+13	3677		Adults >=15	Female	III or IV	<100	1530	4.19178		IPT and ART	0	No TB	0			TO	4.19178
Hospital	115	14	140115007917901	3682		Adults >=15	Female	III or IV	<100	1533	4.2		IPT and ART	0	No TB	0			Active	4.2
Hospital	117	14	140117007967280	3696		Adults >=15	Female	III or IV	<100	1535	4.20548		IPT and ART	0	No TB	0			Active	4.20548
Hospital	21	12	120021006991177	3717		Adults >=15	Female	III or IV	<100	1541	4.22192		IPT and ART	0	No TB	0			Active	4.22192
Hospital	21	12	120021007106606	3725		Adults >=15	Female	III or IV	<100	1543	4.2274		IPT and ART	0	No TB	0			Active	4.2274
Hospital	117	14	140117006373320	3727		Adults >=15	Female	III or IV	<100	1544	4.23014		IPT and ART	0	No TB	0			Active	4.23014
Hospital	117	14	140117007341484	3731		Adults >=15	Female	III or IV	<100	1546	4.23562		IPT and ART	0	No TB	0			Active	4.23562
Hospital	117	14	140117008190632	3746		Adults >=15	Female	III or IV	<100	1550	4.24658		IPT and ART	0	No TB	0			Active	4.24658
Hospital	117	14	140117007741968	3760		Adults >=15	Female	III or IV	<100	1554	4.25753		IPT and ART	0	No TB	0			Active	4.25753
Hospital	21	12	120021007433667	3770		Adults >=15	Female	III or IV	<100	1556	4.26301		IPT and ART	0	No TB	0			Active	4.26301
Hospital	117	14	140117008178077	3774		Adults >=15	Female	III or IV	<100	1558	4.26849		IPT and ART	0	No TB	0			Active	4.26849
Hospital	21	12	120021003970292	3777		Adults >=15	Female	III or IV	<100	1559	4.27123		IPT and ART	0	No TB	0			Active	4.27123
Hospital	47	07	7.0047e+13	3780		Adults >=15	Female	III or IV	<100	1561	4.27671		IPT and ART	0	No TB	0			Active	4.27671
Hospital	21	12	120021007215975	3783		Adults >=15	Female	III or IV	<100	1564	4.28493		IPT and ART	0	No TB	0			Active	4.28493
Hospital	117	14	140117006541030	3788		Adults >=15	Female	III or IV	<100	1568	4.29589		IPT and ART	0	No TB	0			Active	4.29589
Hospital	117	14	140117007800573	3790		Adults >=15	Female	III or IV	<100	1568	4.29589		IPT and ART	0	No TB	0			Active	4.29589
Hospital	59	14	140059005993961	3793		Adults >=15	Female	III or IV	<100	1571	4.30411		IPT and ART	0	No TB	0			Active	4.30411
Hospital	117	14	140117007999679	3810		Adults >=15	Female	III or IV	<100	1578	4.32329		IPT and ART	0	No TB	0			LOST	4.32329
Hospital	117	14	140117008251664	3821		Adults >=15	Female	III or IV	<100	1583	4.33699		IPT and ART	0	No TB	0			Active	4.33699
Hospital	110	07	70110006502790	3824		Adults >=15	Female	III or IV	<100	1586	4.34521		IPT and ART	0	No TB	0			Active	4.34521
Hospital	117	14	140117005866468	3826		Adults >=15	Female	III or IV	<100	1586	4.34521		IPT and ART	0	No TB	0			Active	4.34521
Hospital	117	14	140117007654917	3834		Adults >=15	Female	III or IV	<100	1589	4.35342		IPT and ART	0	No TB	0			Active	4.35342
Hospital	117	14	140117007052721	3839		Adults >=15	Female	III or IV	<100	1592	4.36164		IPT and ART	0	No TB	0			Active	4.36164
Hospital	117	14	140117007212294	3846		Adults >=15	Female	III or IV	<100	1595	4.36986		IPT and ART	0	No TB	0			Active	4.36986
Hospital	59	14	140059007336937	3851		Adults >=15	Female	III or IV	<100	1598	4.37808		IPT and ART	0	No TB	0			Active	4.37808
Hospital	117	14	140117007396335	3865		Adults >=15	Female	III or IV	<100	1602	4.38904		IPT and ART	0	No TB	0			Active	4.38904
Hospital	117	14	140117008173857	3871		Adults >=15	Female	III or IV	<100	1605	4.39726		IPT and ART	0	No TB	0			Active	4.39726
Hospital	117	14	140117007128496	3892		Adults >=15	Female	III or IV	<100	1612	4.41644		IPT and ART	0	No TB	0			Active	4.41644
Hospital	110	07	70110006313548	3899		Adults >=15	Female	III or IV	<100	1615	4.42466		IPT and ART	0	No TB	0			Active	4.42466
Hospital	59	14	140059007082549	3902		Adults >=15	Female	III or IV	<100	1617	4.43014		IPT and ART	0	No TB	0			Active	4.43014
Hospital	59	14	140059004828314	3915		Adults >=15	Female	III or IV	<100	1620	4.43836		IPT and ART	0	No TB	0			Active	4.43836
Hospital	51	07	7.0051e+13	3926		Adults >=15	Female	III or IV	<100	1624	4.44932		IPT and ART	0	No TB	0			Active	4.44932
Hospital	59	14	140059006703188	3932		Adults >=15	Female	III or IV	<100	1627	4.45753		IPT and ART	0	No TB	0			Active	4.45753
Hospital	59	14	140059008518792	3933		Adults >=15	Female	III or IV	<100	1628	4.46027		IPT and ART	0	No TB	0			Active	4.46027
Hospital	117	14	140117006984716	3940		Adults >=15	Female	III or IV	<100	1632	4.47123		IPT and ART	0	No TB	0			Active	4.47123
Hospital	117	14	140117007041412	3945		Adults >=15	Female	III or IV	<100	1633	4.47397		IPT and ART	0	No TB	0			Active	4.47397
Hospital	117	14	140117007662468	3946		Adults >=15	Female	III or IV	<100	1633	4.47397		IPT and ART	0	No TB	0			Active	4.47397
Hospital	117	14	140117005187386	3950		Adults >=15	Female	III or IV	<100	1635	4.47945		IPT and ART	0	No TB	0			Active	4.47945
Hospital	117	14	140117007374002	3952		Adults >=15	Female	III or IV	<100	1637	4.48493		IPT and ART	0	No TB	0			Active	4.48493
Hospital	117	14	140117008254789	3954		Adults >=15	Female	III or IV	<100	1637	4.48493		IPT and ART	0	No TB	0			Active	4.48493
Hospital	115	14	140115007279319	3965		Adults >=15	Female	III or IV	<100	1641	4.49589		IPT and ART	0	No TB	0			Active	4.49589
Hospital	117	14	140117006434547	3968		Adults >=15	Female	III or IV	<100	1642	4.49863		IPT and ART	0	No TB	0			Active	4.49863
Hospital	117	14	140117007522400	3971		Adults >=15	Female	III or IV	<100	1644	4.50411		IPT and ART	0	No TB	0			Active	4.50411
Hospital	153	07	7.0153e+13	3986		Adults >=15	Female	III or IV	<100	1648	4.51507		IPT and ART	0	No TB	0			Active	4.51507
Hospital	117	14	140117007942362	4011		Adults >=15	Female	III or IV	<100	1655	4.53425		IPT and ART	0	No TB	0			Active	4.53425
Hospital	117	14	140117006313548	4012		Adults >=15	Female	III or IV	<100	1655	4.53425		IPT and ART	0	No TB	0			Active	4.53425
Hospital	59	14	140059007895064	4023		Adults >=15	Female	III or IV	<100	1659	4.54521		IPT and ART	0	No TB	0			Active	4.54521
Hospital	117	14	140117007842671	4034		Adults >=15	Female	III or IV	<100	1666	4.56438		IPT and ART	0	No TB	0			Active	4.56438
Hospital	59	14	140059007453562	4036		Adults >=15	Female	III or IV	<100	1666	4.56438		IPT and ART	0	No TB	0			Active	4.56438
Hospital	117	14	140117008248791	4046		Adults >=15	Female	III or IV	<100	1668	4.56986		IPT and ART	0	No TB	0			Active	4.56986
Hospital	117	14	140117005953243	4047		Adults >=15	Female	III or IV	<100	1668	4.56986		IPT and ART	0	No TB	0			Active	4.56986
Hospital	59	14	140059007497762	4055		Adults >=15	Female	III or IV	<100	1672	4.58082		IPT and ART	0	No TB	0			DROP	4.58082
Hospital	117	14	140117007587817	4057		Adults >=15	Female	III or IV	<100	1672	4.58082		IPT and ART	0	No TB	0			Active	4.58082
Hospital	59	14	140059007643004	4058		Adults >=15	Female	III or IV	<100	1673	4.58356		IPT and ART	0	No TB	0			Active	4.58356
Hospital	117	14	140117004727388	4061		Adults >=15	Female	III or IV	<100	1675	4.58904		IPT and ART	0	No TB	0			Active	4.58904
Hospital	117	14	140117006411818	4074		Adults >=15	Female	III or IV	<100	1679	4.6		IPT and ART	0	No TB	0			Active	4.6
Hospital	117	14	140117001791759	4079		Adults >=15	Female	III or IV	<100	1680	4.60274		IPT and ART	0	No TB	0			Active	4.60274
Hospital	117	14	140117004615121	4081		Adults >=15	Female	III or IV	<100	1680	4.60274		IPT and ART	0	No TB	0			LOST	4.60274
Hospital	117	14	140117006591674	4092		Adults >=15	Female	III or IV	<100	1684	4.6137		IPT and ART	0	No TB	0			Active	4.6137
Hospital	117	14	140117006309918	4093		Adults >=15	Female	III or IV	<100	1684	4.6137		IPT and ART	0	No TB	0			Active	4.6137
Hospital	117	14	140117007081709	4102		Adults >=15	Female	III or IV	<100	1686	4.61918		IPT and ART	0	No TB	0			Active	4.61918
Hospital	117	14	140117007528332	4104		Adults >=15	Female	III or IV	<100	1687	4.62192		IPT and ART	0	No TB	0			Active	4.62192
Hospital	117	14	140117007822845	4105		Adults >=15	Female	III or IV	<100	1687	4.62192		IPT and ART	0	No TB	0			Active	4.62192
Hospital	153	07	7.0153e+13	4111		Adults >=15	Female	III or IV	<100	1692	4.63562		IPT and ART	0	No TB	0			Active	4.63562
Hospital	117	14	140117008200014	4119		Adults >=15	Female	III or IV	<100	1694	4.6411		IPT and ART	0	No TB	0			Active	4.6411
Hospital	21	12	120021007470794	4120		Adults >=15	Female	III or IV	<100	1694	4.6411		IPT and ART	0	No TB	0			Active	4.6411
Hospital	59	14	140059007115582	4122		Adults >=15	Female	III or IV	<100	1696	4.64658		IPT and ART	0	No TB	0			Active	4.64658
Hospital	47	07	7.0047e+13	4126		Adults >=15	Female	III or IV	<100	1699	4.65479		IPT and ART	0	No TB	0			Active	4.65479
Hospital	51	07	7.0051e+13	4128		Adults >=15	Female	III or IV	<100	1701	4.66027		IPT and ART	0	No TB	0			Active	4.66027
Hospital	117	14	140117008160804	4141		Adults >=15	Female	III or IV	<100	1705	4.67123		IPT and ART	0	No TB	0			Active	4.67123
Hospital	117	14	140117007642524	4154		Adults >=15	Female	III or IV	<100	1709	4.68219		IPT and ART	0	No TB	0			Active	4.68219
Hospital	117	14	140117007518607	4167		Adults >=15	Female	III or IV	<100	1715	4.69863		IPT and ART	0	No TB	0			Active	4.69863
Hospital	117	14	140117007149132	4199		Adults >=15	Female	III or IV	<100	1743	4.77534		IPT and ART	0	No TB	0			Active	4.77534
Hospital	117	14	140117007451242	4200		Adults >=15	Female	III or IV	<100	1744	4.77808		IPT and ART	0	No TB	0			Active	4.77808
Hospital	117	14	140117008099554	4205		Adults >=15	Female	III or IV	<100	1750	4.79452		IPT and ART	0	No TB	0			Active	4.79452
Hospital	117	14	140117006944087	4234		Adults >=15	Female	III or IV	<100	1798	4.92603		IPT and ART	0	No TB	0			Active	4.92603
Hospital	115	14	140115009097172	4255		Adults >=15	Female	III or IV	<100	1858	5.09041		IPT and ART	0	No TB	0			Active	5.09041
Hospital	117	14	140117007808323	4317		Adults >=15	Female	III or IV	<100	2011	5.50959		IPT and ART	0	No TB	0			Active	5.50959
Hospital	49	07	7.0049e+13	4320		Adults >=15	Female	III or IV	<100	2018	5.52877		IPT and ART	0	No TB	0			Active	5.52877
Hospital	51	07	7.0051e+13	4353		Adults >=15	Female	III or IV	<100	2077	5.69041		IPT and ART	0	No TB	0			Active	5.69041
Hospital	117	14	140117007409742	4372		Adults >=15	Female	III or IV	<100	2137	5.85479		IPT and ART	0	No TB	0			Active	5.85479
Hospital	49	07	7.0049e+13	4427		Adults >=15	Female	III or IV	<100	2320	6.35616		IPT and ART	0	No TB	0			Active	6.35616
Hospital	117	14	140117007446585	4472		Adults >=15	Female	III or IV	<100	2470	6.76712		IPT and ART	0	No TB	0			TO	6.76712
Hospital	115	14	140115010318507	1140		Pediatric <15	Female	III or IV	<100	563	1.54247		IPT and ART	0	No TB	0			Active	1.54247
Hospital	115	14	140115010310085	1209		Pediatric <15	Female	III or IV	<100	590	1.61644		IPT and ART	0	No TB	0			Active	1.61644
Hospital	115	14	140115010320288	1622		Pediatric <15	Female	III or IV	<100	766	2.09863		IPT and ART	0	No TB	0			Active	2.09863
Hospital	21	12	120021006689599	2789		Pediatric <15	Female	III or IV	<100	1242	3.40274		IPT and ART	0	No TB	0			Active	3.40274
Hospital	117	14	140117007775276	3312		Pediatric <15	Female	III or IV	<100	1401	3.83836		IPT and ART	0	No TB	0			Active	3.83836
Hospital	21	12	120021007835579	13		Adults >=15	Female	I or II	>349	21	0.0575342		IPT only	0	No TB	0				0.0575342
Hospital	21	12	120021007766417	14		Adults >=15	Female	III or IV	100-349	21	0.0575342		IPT only	0	No TB	0				0.0575342
Hospital	21	12	120021008164795	17		Adults >=15	Female	I or II	>349	24	0.0657534		IPT only	0	No TB	0				0.0657534
Hospital	21	12	120021007996990	19		Adults >=15	Female	I or II	>349	27	0.0739726		IPT only	0	No TB	0				0.0739726
Hospital	176	07	7.0176e+13	21		Adults >=15	Female	III or IV	>349	27	0.0739726		IPT only	0	No TB	0				0.0739726
Hospital	21	12	120021007936660	22		Adults >=15	Female	III or IV	>349	27	0.0739726		IPT only	0	No TB	0				0.0739726
Hospital	21	12	120021008203578	20		Adults >=15	Female	III or IV	100-349	27	0.0739726		IPT only	0	No TB	0				0.0739726
Hospital	21	12	120021007952967	23		Adults >=15	Female	I or II	>349	28	0.0767123		IPT only	0	No TB	0				0.0767123
Hospital	21	12	120021008193677	26		Adults >=15	Female	III or IV	>349	28	0.0767123		IPT only	0	No TB	0				0.0767123
Hospital	21	12	120021007880426	358		Adults >=15	Male	III or IV	<100	193	0.528767		IPT and ART	0	No TB	0			DROP	0.528767
Hospital	49	07	7.0049e+13	364		Adults >=15	Male	III or IV	<100	198	0.542466		IPT and ART	0	No TB	0			DROP	0.542466
Hospital	117	14	140117007616776	390		Adults >=15	Male	III or IV	<100	211	0.578082		IPT and ART	0	No TB	0			TO	0.578082
Hospital	153	07	7.0153e+13	404		Adults >=15	Male	III or IV	<100	220	0.60274		IPT and ART	0	No TB	0			DEAD	0.60274
Hospital	49	07	7.0049e+13	450		Adults >=15	Male	III or IV	<100	255	0.69863		IPT and ART	0	No TB	0			TO	0.69863
Hospital	21	12	120021008238273	494		Adults >=15	Male	III or IV	<100	277	0.758904		IPT and ART	0	No TB	0			LOST	0.758904
Hospital	117	14	140117007837949	506		Adults >=15	Male	III or IV	<100	283	0.775342		IPT and ART	0	No TB	0			TO	0.775342
Hospital	110	07	7.011e+13	541		Adults >=15	Male	III or IV	<100	299	0.819178		IPT and ART	0	No TB	0			DROP	0.819178
Hospital	115	14	140115009482883	642		Adults >=15	Male	III or IV	<100	355	0.972603		IPT and ART	0	No TB	0			Active	0.972603
Hospital	271	07	7.0271e+13	643		Adults >=15	Male	III or IV	<100	356	0.975342		IPT and ART	0	No TB	0			TO	0.975342
Hospital	153	07	7.0153e+13	667		Adults >=15	Male	III or IV	<100	365	1		IPT and ART	0	No TB	0			Active	1
Hospital	21	12	120021008073091	668		Adults >=15	Male	III or IV	<100	365	1		IPT and ART	0	No TB	0			Active	1
Hospital	115	14	140115008905987	741		Adults >=15	Male	III or IV	<100	397	1.08767		IPT and ART	0	No TB	0			DROP	1.08767
Hospital	271	07	7.0271e+13	774		Adults >=15	Male	III or IV	<100	414	1.13425		IPT and ART	0	No TB	0			Active	1.13425
Hospital	59	14	140059007814400	780		Adults >=15	Male	III or IV	<100	418	1.14521		IPT and ART	0	No TB	0			DROP	1.14521
Hospital	271	07	7.0271e+13	783		Adults >=15	Male	III or IV	<100	419	1.14795		IPT and ART	0	No TB	0			Active	1.14795
Hospital	59	14	140059006381816	810		Adults >=15	Male	III or IV	<100	425	1.16438		IPT and ART	0	No TB	0			Active	1.16438
Hospital	21	12	120021006942157	833		Adults >=15	Male	III or IV	<100	436	1.19452		IPT and ART	0	No TB	0			DROP	1.19452
Hospital	21	12	120021006647688	834		Adults >=15	Male	III or IV	<100	437	1.19726		IPT and ART	0	No TB	0			DEAD	1.19726
Hospital	59	14	140059007507141	837		Adults >=15	Male	III or IV	<100	439	1.20274		IPT and ART	0	No TB	0			Active	1.20274
Hospital	21	12	120021007687539	853		Adults >=15	Male	III or IV	<100	443	1.2137		IPT and ART	0	No TB	0			DROP	1.2137
Hospital	51	07	7.0051e+13	870		Adults >=15	Male	III or IV	<100	453	1.2411		IPT and ART	0	No TB	0			TO	1.2411
Hospital	21	12	120021008199189	883		Adults >=15	Male	III or IV	<100	463	1.26849		IPT and ART	0	No TB	0			Active	1.26849
Hospital	271	07	7.0271e+13	972		Adults >=15	Male	III or IV	<100	503	1.37808		IPT and ART	0	No TB	0			Active	1.37808
Hospital	47	07	7.0047e+13	983		Adults >=15	Male	III or IV	<100	504	1.38082		IPT and ART	0	No TB	0			DROP	1.38082
Hospital	47	07	7.0047e+13	991		Adults >=15	Male	III or IV	<100	505	1.38356		IPT and ART	0	No TB	0			DROP	1.38356
Hospital	21	12	120021006483107	1058		Adults >=15	Male	III or IV	<100	527	1.44384		IPT and ART	0	No TB	0			TO	1.44384
Hospital	59	14	140059007035269	1098		Adults >=15	Male	III or IV	<100	544	1.49041		IPT and ART	0	No TB	0			DROP	1.49041
Hospital	117	14	140117005645447	1114		Adults >=15	Male	III or IV	<100	553	1.51507		IPT and ART	0	No TB	0			Active	1.51507
Hospital	271	07	7.0271e+13	1211		Adults >=15	Male	III or IV	<100	590	1.61644		IPT and ART	0	No TB	0			Active	1.61644
Hospital	115	14	140115007723562	1262		Adults >=15	Male	III or IV	<100	608	1.66575		IPT and ART	0	No TB	0			Active	1.66575
Hospital	117	14	140117006781058	1274		Adults >=15	Male	III or IV	<100	615	1.68493		IPT and ART	0	No TB	0			TO	1.68493
Hospital	59	14	140059008523175	1310		Adults >=15	Male	III or IV	<100	639	1.75068		IPT and ART	0	No TB	0			Active	1.75068
Hospital	21	12	120021005697093	1393		Adults >=15	Male	III or IV	<100	670	1.83562		IPT and ART	0	No TB	0			TO	1.83562
Hospital	117	14	140117007397562	1421		Adults >=15	Male	III or IV	<100	678	1.85753		IPT and ART	0	No TB	0			DEAD	1.85753
Hospital	51	07	70051007239215	1427		Adults >=15	Male	III or IV	<100	681	1.86575		IPT and ART	0	No TB	0			DEAD	1.86575
Hospital	117	14	140117007548556	1439		Adults >=15	Male	III or IV	<100	686	1.87945		IPT and ART	0	No TB	0			Active	1.87945
Hospital	49	07	7.0049e+13	1457		Adults >=15	Male	III or IV	<100	692	1.89589		IPT and ART	0	No TB	0			DROP	1.89589
Hospital	47	07	7.0047e+13	1469		Adults >=15	Male	III or IV	<100	698	1.91233		IPT and ART	0	No TB	0			Active	1.91233
Hospital	59	14	140059006664409	1489		Adults >=15	Male	III or IV	<100	706	1.93425		IPT and ART	0	No TB	0			DROP	1.93425
Hospital	49	07	70049007215240	1498		Adults >=15	Male	III or IV	<100	709	1.94247		IPT and ART	0	No TB	0			TO	1.94247
Hospital	59	14	140059007502186	1511		Adults >=15	Male	III or IV	<100	719	1.96986		IPT and ART	0	No TB	0			Active	1.96986
Hospital	115	14	140115007967280	1517		Adults >=15	Male	III or IV	<100	721	1.97534		IPT and ART	0	No TB	0			Active	1.97534
Hospital	115	14	140115008358432	1526		Adults >=15	Male	III or IV	<100	726	1.98904		IPT and ART	0	No TB	0			Active	1.98904
Hospital	117	14	140117007908755	1568		Adults >=15	Male	III or IV	<100	745	2.0411		IPT and ART	0	No TB	0			DROP	2.0411
Hospital	115	14	140115007031741	1598		Adults >=15	Male	III or IV	<100	755	2.06849		IPT and ART	0	No TB	0			Active	2.06849
Hospital	115	14	140115010326498	1607		Adults >=15	Male	III or IV	<100	756	2.07123		IPT and ART	0	No TB	0			Active	2.07123
Hospital	59	14	140059006226537	1649		Adults >=15	Male	III or IV	<100	778	2.13151		IPT and ART	0	No TB	0			Active	2.13151
Hospital	21	12	120021007892452	1653		Adults >=15	Male	III or IV	<100	781	2.13973		IPT and ART	0	No TB	0			Active	2.13973
Hospital	59	14	140059007845808	1674		Adults >=15	Male	III or IV	<100	792	2.16986		IPT and ART	0	No TB	0			Active	2.16986
Hospital	115	14	140115008645762	1739		Adults >=15	Male	III or IV	<100	823	2.25479		IPT and ART	0	No TB	0			Active	2.25479
Hospital	110	07	7.011e+13	1819		Adults >=15	Male	III or IV	<100	866	2.3726		IPT and ART	0	No TB	0			Active	2.3726
Hospital	117	14	140117008820109	1833		Adults >=15	Male	III or IV	<100	875	2.39726		IPT and ART	0	No TB	0			DROP	2.39726
Hospital	59	14	140059008094684	1838		Adults >=15	Male	III or IV	<100	879	2.40822		IPT and ART	0	No TB	0			Active	2.40822
Hospital	49	07	7.0049e+13	1869		Adults >=15	Male	III or IV	<100	894	2.44932		IPT and ART	0	No TB	0			Active	2.44932
Hospital	51	07	7.0051e+13	1877		Adults >=15	Male	III or IV	<100	898	2.46027		IPT and ART	0	No TB	0			TO	2.46027
Hospital	117	14	140117007616284	1881		Adults >=15	Male	III or IV	<100	899	2.46301		IPT and ART	0	No TB	0			Active	2.46301
Hospital	51	07	7.0051e+13	1931		Adults >=15	Male	III or IV	<100	927	2.53973		IPT and ART	0	No TB	0			Active	2.53973
Hospital	49	07	70049006354370	1945		Adults >=15	Male	III or IV	<100	934	2.5589		IPT and ART	0	No TB	0			Active	2.5589
Hospital	117	14	140117005717028	1959		Adults >=15	Male	III or IV	<100	942	2.58082		IPT and ART	0	No TB	0			TO	2.58082
Hospital	49	07	7.0049e+13	1965		Adults >=15	Male	III or IV	<100	944	2.5863		IPT and ART	0	No TB	0			Active	2.5863
Hospital	51	07	7.0051e+13	2025		Adults >=15	Male	III or IV	<100	967	2.64932		IPT and ART	0	No TB	0			Active	2.64932
Hospital	21	12	120021008064951	2027		Adults >=15	Male	III or IV	<100	968	2.65205		IPT and ART	0	No TB	0			Active	2.65205
Hospital	115	14	140115008733111	2042		Adults >=15	Male	III or IV	<100	975	2.67123		IPT and ART	0	No TB	0			Active	2.67123
Hospital	51	07	7.0051e+13	2044		Adults >=15	Male	III or IV	<100	976	2.67397		IPT and ART	0	No TB	0			Active	2.67397
Hospital	21	12	120021007969358	2050		Adults >=15	Male	III or IV	<100	980	2.68493		IPT and ART	0	No TB	0			Active	2.68493
Hospital	21	12	120021007722678	2087		Adults >=15	Male	III or IV	<100	993	2.72055		IPT and ART	0	No TB	0			DROP	2.72055
Hospital	117	14	140117007997999	2098		Adults >=15	Male	III or IV	<100	997	2.73151		IPT and ART	0	No TB	0			TO	2.73151
Hospital	59	14	140059006704414	2105		Adults >=15	Male	III or IV	<100	999	2.73699		IPT and ART	0	No TB	0			Active	2.73699
Hospital	117	14	140117005303305	2138		Adults >=15	Male	III or IV	<100	1014	2.77808		IPT and ART	0	No TB	0			Active	2.77808
Hospital	49	07	7.0049e+13	2148		Adults >=15	Male	III or IV	<100	1018	2.78904		IPT and ART	0	No TB	0			Active	2.78904
Hospital	115	14	140115009300090	2163		Adults >=15	Male	III or IV	<100	1022	2.8		IPT and ART	0	No TB	0			Active	2.8
Hospital	59	14	140059005774552	2172		Adults >=15	Male	III or IV	<100	1024	2.80548		IPT and ART	0	No TB	0			Active	2.80548
Hospital	59	14	140059007239215	2175		Adults >=15	Male	III or IV	<100	1025	2.80822		IPT and ART	0	No TB	0			Active	2.80822
Hospital	117	14	140117007104144	2197		Adults >=15	Male	III or IV	<100	1033	2.83014		IPT and ART	0	No TB	0			Active	2.83014
Hospital	59	14	140059008042700	2222		Adults >=15	Male	III or IV	<100	1044	2.86027		IPT and ART	0	No TB	0			Active	2.86027
Hospital	59	14	140059007665285	2229		Adults >=15	Male	III or IV	<100	1046	2.86575		IPT and ART	0	No TB	0			Active	2.86575
Hospital	49	07	7.0049e+13	2233		Adults >=15	Male	III or IV	<100	1046	2.86575		IPT and ART	0	No TB	0			Active	2.86575
Hospital	117	14	140117007111512	2272		Adults >=15	Male	III or IV	<100	1060	2.90411		IPT and ART	0	No TB	0			Active	2.90411
Hospital	117	14	140117007086738	2328		Adults >=15	Male	III or IV	<100	1079	2.95616		IPT and ART	0	No TB	0			Active	2.95616
Hospital	117	14	140117009210140	2332		Adults >=15	Male	III or IV	<100	1080	2.9589		IPT and ART	0	No TB	0			TO	2.9589
Hospital	117	14	140117007474772	2358		Adults >=15	Male	III or IV	<100	1086	2.97534		IPT and ART	0	No TB	0			Active	2.97534
Hospital	59	14	140059007536897	2376		Adults >=15	Male	III or IV	<100	1092	2.99178		IPT and ART	0	No TB	0			Active	2.99178
Hospital	59	14	140059005609472	2423		Adults >=15	Male	III or IV	<100	1111	3.04384		IPT and ART	0	No TB	0			TO	3.04384
Hospital	59	14	140059007094235	2449		Adults >=15	Male	III or IV	<100	1122	3.07397		IPT and ART	0	No TB	0			Active	3.07397
Hospital	59	14	140059007806289	2465		Adults >=15	Male	III or IV	<100	1128	3.09041		IPT and ART	0	No TB	0			Active	3.09041
Hospital	51	07	7.0051e+13	2483		Adults >=15	Male	III or IV	<100	1135	3.10959		IPT and ART	0	No TB	0			DROP	3.10959
Hospital	59	14	140059007334982	2487		Adults >=15	Male	III or IV	<100	1136	3.11233		IPT and ART	0	No TB	0			Active	3.11233
Hospital	21	12	120021006894670	2489		Adults >=15	Male	III or IV	<100	1137	3.11507		IPT and ART	0	No TB	0			DROP	3.11507
Hospital	59	14	140059007977282	2494		Adults >=15	Male	III or IV	<100	1138	3.11781		IPT and ART	0	No TB	0			Active	3.11781
Hospital	59	14	140059006572283	2496		Adults >=15	Male	III or IV	<100	1139	3.12055		IPT and ART	0	No TB	0			Active	3.12055
Hospital	59	14	140059007996317	2506		Adults >=15	Male	III or IV	<100	1142	3.12877		IPT and ART	0	No TB	0			Active	3.12877
Hospital	59	14	140059006599871	2508		Adults >=15	Male	III or IV	<100	1142	3.12877		IPT and ART	0	No TB	0			Active	3.12877
Hospital	21	12	120021007872074	2537		Adults >=15	Male	III or IV	<100	1154	3.16164		IPT and ART	0	No TB	0			Active	3.16164
Hospital	59	14	140059006442540	2544		Adults >=15	Male	III or IV	<100	1156	3.16712		IPT and ART	0	No TB	0			Active	3.16712
Hospital	59	14	140059007299121	2559		Adults >=15	Male	III or IV	<100	1160	3.17808		IPT and ART	0	No TB	0			Active	3.17808
Hospital	59	14	140059008101981	2614		Adults >=15	Male	III or IV	<100	1178	3.2274		IPT and ART	0	No TB	0			Active	3.2274
Hospital	49	07	7.0049e+13	2618		Adults >=15	Male	III or IV	<100	1179	3.23014		IPT and ART	0	No TB	0			Active	3.23014
Hospital	59	14	140059007217443	2630		Adults >=15	Male	III or IV	<100	1183	3.2411		IPT and ART	0	No TB	0			Active	3.2411
Hospital	59	14	140059007905442	2659		Adults >=15	Male	III or IV	<100	1194	3.27123		IPT and ART	0	No TB	0			Active	3.27123
Hospital	59	14	140059008078688	2668		Adults >=15	Male	III or IV	<100	1199	3.28493		IPT and ART	0	No TB	0			Active	3.28493
Hospital	59	14	140059007880426	2692		Adults >=15	Male	III or IV	<100	1207	3.30685		IPT and ART	0	No TB	0			Active	3.30685
Hospital	176	07	7.0176e+13	2693		Adults >=15	Male	III or IV	<100	1207	3.30685		IPT and ART	0	No TB	0			Active	3.30685
Hospital	59	14	140059006591674	2702		Adults >=15	Male	III or IV	<100	1211	3.31781		IPT and ART	0	No TB	0			Active	3.31781
Hospital	117	14	140117007514255	2717		Adults >=15	Male	III or IV	<100	1220	3.34247		IPT and ART	0	No TB	0			Active	3.34247
Hospital	21	12	120021007789455	2745		Adults >=15	Male	III or IV	<100	1229	3.36712		IPT and ART	0	No TB	0			DROP	3.36712
Hospital	117	14	140117008281977	2781		Adults >=15	Male	III or IV	<100	1239	3.39452		IPT and ART	0	No TB	0			Active	3.39452
Hospital	59	14	140059005955837	2796		Adults >=15	Male	III or IV	<100	1245	3.41096		IPT and ART	0	No TB	0			Active	3.41096
Hospital	59	14	140059007032624	2801		Adults >=15	Male	III or IV	<100	1246	3.4137		IPT and ART	0	No TB	0			Active	3.4137
Hospital	59	14	140059007233455	2816		Adults >=15	Male	III or IV	<100	1251	3.4274		IPT and ART	0	No TB	0			Active	3.4274
Hospital	110	07	7.011e+13	2825		Adults >=15	Male	III or IV	<100	1252	3.43014		IPT and ART	0	No TB	0			Active	3.43014
Hospital	115	14	140115007694393	2832		Adults >=15	Male	III or IV	<100	1255	3.43836		IPT and ART	0	No TB	0			Active	3.43836
Hospital	117	14	140117007733246	2844		Adults >=15	Male	III or IV	<100	1257	3.44384		IPT and ART	0	No TB	0			Active	3.44384
Hospital	21	12	120021007339538	2863		Adults >=15	Male	III or IV	<100	1261	3.45479		IPT and ART	0	No TB	0			Active	3.45479
Hospital	49	07	7.0049e+13	2873		Adults >=15	Male	III or IV	<100	1264	3.46301		IPT and ART	0	No TB	0			Active	3.46301
Hospital	59	14	140059008108924	2893		Adults >=15	Male	III or IV	<100	1269	3.47671		IPT and ART	0	No TB	0			Active	3.47671
Hospital	59	14	140059007546446	2898		Adults >=15	Male	III or IV	<100	1271	3.48219		IPT and ART	0	No TB	0			Active	3.48219
Hospital	59	14	140059006228511	2908		Adults >=15	Male	III or IV	<100	1274	3.49041		IPT and ART	0	No TB	0			Active	3.49041
Hospital	59	14	140059007564238	2914		Adults >=15	Male	III or IV	<100	1276	3.49589		IPT and ART	0	No TB	0			Active	3.49589
Hospital	59	14	140059007056175	2917		Adults >=15	Male	III or IV	<100	1277	3.49863		IPT and ART	0	No TB	0			Active	3.49863
Hospital	59	14	140059006142037	2941		Adults >=15	Male	III or IV	<100	1284	3.51781		IPT and ART	0	No TB	0			Active	3.51781
Hospital	21	12	120021007378384	2945		Adults >=15	Male	III or IV	<100	1285	3.52055		IPT and ART	0	No TB	0			DROP	3.52055
Hospital	59	14	140059007736307	2952		Adults >=15	Male	III or IV	<100	1289	3.53151		IPT and ART	0	No TB	0			Active	3.53151
Hospital	21	12	120021007873978	2953		Adults >=15	Male	III or IV	<100	1289	3.53151		IPT and ART	0	No TB	0			Active	3.53151
Hospital	59	14	140059007945201	2956		Adults >=15	Male	III or IV	<100	1290	3.53425		IPT and ART	0	No TB	0			Active	3.53425
Hospital	59	14	140059006989335	2963		Adults >=15	Male	III or IV	<100	1291	3.53699		IPT and ART	0	No TB	0			Active	3.53699
Hospital	115	14	140115008576970	2971		Adults >=15	Male	III or IV	<100	1294	3.54521		IPT and ART	0	No TB	0			Active	3.54521
Hospital	59	14	140059006297109	2995		Adults >=15	Male	III or IV	<100	1304	3.5726		IPT and ART	0	No TB	0			Active	3.5726
Hospital	59	14	140059007399398	3045		Adults >=15	Male	III or IV	<100	1319	3.6137		IPT and ART	0	No TB	0			Active	3.6137
Hospital	59	14	140059007422374	3047		Adults >=15	Male	III or IV	<100	1319	3.6137		IPT and ART	0	No TB	0			Active	3.6137
Hospital	59	14	140059008025189	3061		Adults >=15	Male	III or IV	<100	1324	3.6274		IPT and ART	0	No TB	0			Active	3.6274
Hospital	115	14	140115007204893	3081		Adults >=15	Male	III or IV	<100	1331	3.64658		IPT and ART	0	No TB	0			Active	3.64658
Hospital	59	14	140059007979681	3083		Adults >=15	Male	III or IV	<100	1331	3.64658		IPT and ART	0	No TB	0			Active	3.64658
Hospital	21	12	120021004543295	3097		Adults >=15	Male	III or IV	<100	1334	3.65479		IPT and ART	0	No TB	0			Active	3.65479
Hospital	117	14	140117005384495	3120		Adults >=15	Male	III or IV	<100	1341	3.67397		IPT and ART	0	No TB	0			Active	3.67397
Hospital	115	14	140115006018593	3125		Adults >=15	Male	III or IV	<100	1343	3.67945		IPT and ART	0	No TB	0			Active	3.67945
Hospital	49	07	7.0049e+13	3155		Adults >=15	Male	III or IV	<100	1352	3.70411		IPT and ART	0	No TB	0			Active	3.70411
Hospital	21	12	120021006093570	3188		Adults >=15	Male	III or IV	<100	1364	3.73699		IPT and ART	0	No TB	0			Active	3.73699
Hospital	115	14	140115008551208	3190		Adults >=15	Male	III or IV	<100	1364	3.73699		IPT and ART	0	No TB	0			Active	3.73699
Hospital	21	12	120021007277939	3193		Adults >=15	Male	III or IV	<100	1366	3.74247		IPT and ART	0	No TB	0			Active	3.74247
Hospital	117	14	140117007478170	3197		Adults >=15	Male	III or IV	<100	1366	3.74247		IPT and ART	0	No TB	0			Active	3.74247
Hospital	21	12	120021007666222	3214		Adults >=15	Male	III or IV	<100	1370	3.75342		IPT and ART	0	No TB	0			Active	3.75342
Hospital	51	07	7.0051e+13	3237		Adults >=15	Male	III or IV	<100	1375	3.76712		IPT and ART	0	No TB	0			Active	3.76712
Hospital	117	14	140117006177944	3289		Adults >=15	Male	III or IV	<100	1394	3.81918		IPT and ART	0	No TB	0			Active	3.81918
Hospital	117	14	140117007970395	3307		Adults >=15	Male	III or IV	<100	1400	3.83562		IPT and ART	0	No TB	0			Active	3.83562
Hospital	153	07	7.0153e+13	3372		Adults >=15	Male	III or IV	<100	1424	3.90137		IPT and ART	0	No TB	0			Active	3.90137
Hospital	21	12	120021006175867	3376		Adults >=15	Male	III or IV	<100	1426	3.90685		IPT and ART	0	No TB	0			Active	3.90685
Hospital	117	14	140117007730175	3382		Adults >=15	Male	III or IV	<100	1428	3.91233		IPT and ART	0	No TB	0			Active	3.91233
Hospital	115	14	140115008304247	3399		Adults >=15	Male	III or IV	<100	1436	3.93425		IPT and ART	0	No TB	0			LOST	3.93425
Hospital	59	14	140059007413367	3407		Adults >=15	Male	III or IV	<100	1438	3.93973		IPT and ART	0	No TB	0			Active	3.93973
Hospital	51	07	7.0051e+13	3420		Adults >=15	Male	III or IV	<100	1441	3.94795		IPT and ART	0	No TB	0			Active	3.94795
Hospital	21	12	120021006651572	3450		Adults >=15	Male	III or IV	<100	1451	3.97534		IPT and ART	0	No TB	0			Active	3.97534
Hospital	115	14	140115007409742	3480		Adults >=15	Male	III or IV	<100	1462	4.00548		IPT and ART	0	No TB	0			Active	4.00548
Hospital	49	07	7.0049e+13	3492		Adults >=15	Male	III or IV	<100	1464	4.01096		IPT and ART	0	No TB	0			Active	4.01096
Hospital	21	12	120021007387709	3500		Adults >=15	Male	III or IV	<100	1467	4.01918		IPT and ART	0	No TB	0			DEAD	4.01918
Hospital	21	12	120021006324359	3525		Adults >=15	Male	III or IV	<100	1475	4.0411		IPT and ART	0	No TB	0			Active	4.0411
Hospital	49	07	7.0049e+13	3549		Adults >=15	Male	III or IV	<100	1487	4.07397		IPT and ART	0	No TB	0			DROP	4.07397
Hospital	115	14	140115006230481	3561		Adults >=15	Male	III or IV	<100	1492	4.08767		IPT and ART	0	No TB	0			Active	4.08767
Hospital	21	12	120021007714677	3563		Adults >=15	Male	III or IV	<100	1492	4.08767		IPT and ART	0	No TB	0			Active	4.08767
Hospital	21	12	120021007347944	3569		Adults >=15	Male	III or IV	<100	1494	4.09315		IPT and ART	0	No TB	0			Active	4.09315
Hospital	117	14	140117005605802	3570		Adults >=15	Male	III or IV	<100	1495	4.09589		IPT and ART	0	No TB	0			Active	4.09589
Hospital	51	07	7.0051e+13	3603		Adults >=15	Male	III or IV	<100	1507	4.12877		IPT and ART	0	No TB	0			Active	4.12877
Hospital	59	14	140059008059592	3604		Adults >=15	Male	III or IV	<100	1507	4.12877		IPT and ART	0	No TB	0			Active	4.12877
Hospital	115	14	140115005910797	3607		Adults >=15	Male	III or IV	<100	1508	4.13151		IPT and ART	0	No TB	0			Active	4.13151
Hospital	21	12	120021006423247	3636		Adults >=15	Male	III or IV	<100	1519	4.16164		IPT and ART	0	No TB	0			Active	4.16164
Hospital	21	12	120021006349139	3637		Adults >=15	Male	III or IV	<100	1519	4.16164		IPT and ART	0	No TB	0			Active	4.16164
Hospital	21	12	120021007160846	3676		Adults >=15	Male	III or IV	<100	1530	4.19178		IPT and ART	0	No TB	0			Active	4.19178
Hospital	21	12	120021007156177	3681		Adults >=15	Male	III or IV	<100	1533	4.2		IPT and ART	0	No TB	0			Active	4.2
Hospital	117	14	140117008053887	3693		Adults >=15	Male	III or IV	<100	1535	4.20548		IPT and ART	0	No TB	0			Active	4.20548
Hospital	117	14	140117006723832	3701		Adults >=15	Male	III or IV	<100	1536	4.20822		IPT and ART	0	No TB	0			Active	4.20822
Hospital	47	07	7.0047e+13	3706		Adults >=15	Male	III or IV	<100	1538	4.2137		IPT and ART	0	No TB	0			Active	4.2137
Hospital	117	14	140117007917901	3728		Adults >=15	Male	III or IV	<100	1545	4.23288		IPT and ART	0	No TB	0			Active	4.23288
Hospital	21	12	120021007200425	3762		Adults >=15	Male	III or IV	<100	1555	4.26027		IPT and ART	0	No TB	0			Active	4.26027
Hospital	117	14	140117008201934	3768		Adults >=15	Male	III or IV	<100	1556	4.26301		IPT and ART	0	No TB	0			Active	4.26301
Hospital	117	14	140117007950855	3775		Adults >=15	Male	III or IV	<100	1559	4.27123		IPT and ART	0	No TB	0			Active	4.27123
Hospital	117	14	140117007555905	3784		Adults >=15	Male	III or IV	<100	1564	4.28493		IPT and ART	0	No TB	0			Active	4.28493
Hospital	117	14	140117007256297	3795		Adults >=15	Male	III or IV	<100	1571	4.30411		IPT and ART	0	No TB	0			Active	4.30411
Hospital	117	14	140117007378384	3814		Adults >=15	Male	III or IV	<100	1581	4.33151		IPT and ART	0	No TB	0			Active	4.33151
Hospital	117	14	140117007758333	3842		Adults >=15	Male	III or IV	<100	1593	4.36438		IPT and ART	0	No TB	0			Active	4.36438
Hospital	117	14	140117007193686	3847		Adults >=15	Male	III or IV	<100	1596	4.3726		IPT and ART	0	No TB	0			Active	4.3726
Hospital	117	14	140117007962067	3857		Adults >=15	Male	III or IV	<100	1599	4.38082		IPT and ART	0	No TB	0			Active	4.38082
Hospital	59	14	140059005703782	3860		Adults >=15	Male	III or IV	<100	1600	4.38356		IPT and ART	0	No TB	0			Active	4.38356
Hospital	117	14	140117008013343	3953		Adults >=15	Male	III or IV	<100	1637	4.48493		IPT and ART	0	No TB	0			Active	4.48493
Hospital	117	14	140117008115820	3955		Adults >=15	Male	III or IV	<100	1637	4.48493		IPT and ART	0	No TB	0			Active	4.48493
Hospital	117	14	140117006490724	3964		Adults >=15	Male	III or IV	<100	1641	4.49589		IPT and ART	0	No TB	0			Active	4.49589
Hospital	117	14	140117005141664	3985		Adults >=15	Male	III or IV	<100	1648	4.51507		IPT and ART	0	No TB	0			Active	4.51507
Hospital	117	14	140117008223627	3994		Adults >=15	Male	III or IV	<100	1651	4.52329		IPT and ART	0	No TB	0			Active	4.52329
Hospital	117	14	140117007808729	3997		Adults >=15	Male	III or IV	<100	1651	4.52329		IPT and ART	0	No TB	0			Active	4.52329
Hospital	117	14	140117008164226	4018		Adults >=15	Male	III or IV	<100	1657	4.53973		IPT and ART	0	No TB	0			Active	4.53973
Hospital	59	14	140059007529943	4025		Adults >=15	Male	III or IV	<100	1660	4.54795		IPT and ART	0	No TB	0			Active	4.54795
Hospital	117	14	140117008043984	4048		Adults >=15	Male	III or IV	<100	1670	4.57534		IPT and ART	0	No TB	0			Active	4.57534
Hospital	117	14	140117006767343	4049		Adults >=15	Male	III or IV	<100	1670	4.57534		IPT and ART	0	No TB	0			Active	4.57534
Hospital	117	14	140117007391415	4059		Adults >=15	Male	III or IV	<100	1674	4.5863		IPT and ART	0	No TB	0			Active	4.5863
Hospital	117	14	140117006613384	4073		Adults >=15	Male	III or IV	<100	1679	4.6		IPT and ART	0	No TB	0			Active	4.6
Hospital	59	14	140059007058758	4084		Adults >=15	Male	III or IV	<100	1682	4.60822		IPT and ART	0	No TB	0			Active	4.60822
Hospital	117	14	140117007552237	4096		Adults >=15	Male	III or IV	<100	1685	4.61644		IPT and ART	0	No TB	0			Active	4.61644
Hospital	117	14	140117007647786	4137		Adults >=15	Male	III or IV	<100	1704	4.66849		IPT and ART	0	No TB	0			Active	4.66849
Hospital	117	14	140117004983607	4143		Adults >=15	Male	III or IV	<100	1706	4.67397		IPT and ART	0	No TB	0			Active	4.67397
Hospital	117	14	140117008261268	4164		Adults >=15	Male	III or IV	<100	1713	4.69315		IPT and ART	0	No TB	0			Active	4.69315
Hospital	117	14	140117007998671	4165		Adults >=15	Male	III or IV	<100	1713	4.69315		IPT and ART	0	No TB	0			Active	4.69315
Hospital	47	07	7.0047e+13	4170		Adults >=15	Male	III or IV	<100	1719	4.70959		IPT and ART	0	No TB	0			Active	4.70959
Hospital	47	07	7.0047e+13	4176		Adults >=15	Male	III or IV	<100	1723	4.72055		IPT and ART	0	No TB	0			Active	4.72055
Hospital	117	14	140117008130942	4185		Adults >=15	Male	III or IV	<100	1730	4.73973		IPT and ART	0	No TB	0			Active	4.73973
Hospital	115	14	140115008096817	4204		Adults >=15	Male	III or IV	<100	1748	4.78904		IPT and ART	0	No TB	0			Active	4.78904
Hospital	117	14	140117008022241	4208		Adults >=15	Male	III or IV	<100	1757	4.8137		IPT and ART	0	No TB	0			Active	4.8137
Hospital	59	14	140059007911324	4210		Adults >=15	Male	III or IV	<100	1761	4.82466		IPT and ART	0	No TB	0			Active	4.82466
Hospital	59	14	140059008051660	4226		Adults >=15	Male	III or IV	<100	1783	4.88493		IPT and ART	0	No TB	0			Active	4.88493
Hospital	51	07	7.0051e+13	4283		Adults >=15	Male	III or IV	<100	1934	5.29863		IPT and ART	0	No TB	0			Active	5.29863
Hospital	59	14	140059007703008	4284		Adults >=15	Male	III or IV	<100	1934	5.29863		IPT and ART	0	No TB	0			Active	5.29863
Hospital	49	07	7.0049e+13	4292		Adults >=15	Male	III or IV	<100	1961	5.3726		IPT and ART	0	No TB	0			Active	5.3726
Hospital	51	07	7.0051e+13	4294		Adults >=15	Male	III or IV	<100	1965	5.38356		IPT and ART	0	No TB	0			Active	5.38356
Hospital	115	14	140115008943506	4298		Adults >=15	Male	III or IV	<100	1974	5.40822		IPT and ART	0	No TB	0			Active	5.40822
Hospital	51	07	70051002944439	4307		Adults >=15	Male	III or IV	<100	1996	5.46849		IPT and ART	0	No TB	0			Active	5.46849
Hospital	51	07	70051006645091	4315		Adults >=15	Male	III or IV	<100	2010	5.50685		IPT and ART	0	No TB	0			Active	5.50685
Hospital	51	07	7.0051e+13	4352		Adults >=15	Male	III or IV	<100	2074	5.68219		IPT and ART	0	No TB	0			Active	5.68219
Hospital	115	14	140115006473891	4411		Adults >=15	Male	III or IV	<100	2262	6.19726		IPT and ART	0	No TB	0			Active	6.19726
Hospital	115	14	140115008665268	4425		Adults >=15	Male	III or IV	<100	2313	6.33699		IPT and ART	0	No TB	0			Active	6.33699
Hospital	59	14	140059007095893	4482		Adults >=15	Male	III or IV	<100	2665	7.30137		IPT and ART	0	No TB	0			Active	7.30137
Hospital	21	12	120021008043342	27		Adults >=15	Female	III or IV	>349	28	0.0767123		IPT only	0	No TB	0				0.0767123
Hospital	47	07	7.0047e+13	934		Pediatric <15	Male	III or IV	<100	489	1.33973		IPT and ART	0	No TB	0			Active	1.33973
Hospital	47	07	70047008307706	936		Pediatric <15	Male	III or IV	<100	489	1.33973		IPT and ART	0	No TB	0			Active	1.33973
Hospital	47	07	7.0047e+13	945		Pediatric <15	Male	III or IV	<100	493	1.35068		IPT and ART	0	No TB	0			Active	1.35068
Hospital	115	14	140115010309286	1248		Pediatric <15	Male	III or IV	<100	601	1.64658		IPT and ART	0	No TB	0			Active	1.64658
Hospital	115	14	140115010310884	1438		Pediatric <15	Male	III or IV	<100	686	1.87945		IPT and ART	0	No TB	0			Active	1.87945
Hospital	115	14	140115010336957	1583		Pediatric <15	Male	III or IV	<100	749	2.05205		IPT and ART	0	No TB	0			Active	2.05205
Hospital	47	07	7.0047e+13	1621		Pediatric <15	Male	III or IV	<100	765	2.09589		IPT and ART	0	No TB	0			Active	2.09589
Hospital	115	14	140115010313443	1750		Pediatric <15	Male	III or IV	<100	829	2.27123		IPT and ART	0	No TB	0			Active	2.27123
Hospital	115	14	140115010316094	1768		Pediatric <15	Male	III or IV	<100	839	2.29863		IPT and ART	0	No TB	0			Active	2.29863
Hospital	21	12	120021006820016	2129		Pediatric <15	Male	III or IV	<100	1013	2.77534		IPT and ART	0	No TB	0			TO	2.77534
Hospital	110	07	70110005198497	3702		Pediatric <15	Male	III or IV	<100	1536	4.20822		IPT and ART	0	No TB	0			Active	4.20822
Hospital	115	14	140115010317714	4475		Pediatric <15	Male	III or IV	<100	2530	6.93151		IPT and ART	0	No TB	0			Active	6.93151
Hospital	176	07	7.0176e+13	29		Adults >=15	Female	III or IV	>349	28	0.0767123		IPT only	0	No TB	0				0.0767123
Hospital	153	07	7.0153e+13	585		Adults >=15	Female	I or II	>349	328	0.89863		IPT and ART	0	No TB	0			Active	0.89863
Hospital	21	12	120021008167068	947		Adults >=15	Female	I or II	>349	494	1.35342		IPT and ART	0	No TB	0			Active	1.35342
Hospital	49	07	7.0049e+13	966		Adults >=15	Female	I or II	>349	501	1.3726		IPT and ART	0	No TB	0			Active	1.3726
Hospital	271	07	7.0271e+13	1005		Adults >=15	Female	I or II	>349	511	1.4		IPT and ART	0	No TB	0			Active	1.4
Hospital	271	07	7.0271e+13	1077		Adults >=15	Female	I or II	>349	532	1.45753		IPT and ART	0	No TB	0			TO	1.45753
Hospital	49	07	7.0049e+13	1156		Adults >=15	Female	I or II	>349	569	1.5589		IPT and ART	0	No TB	0			TO	1.5589
Hospital	110	07	7.011e+13	1233		Adults >=15	Female	I or II	>349	596	1.63288		IPT and ART	0	No TB	0			TO	1.63288
Hospital	115	14	140115009127285	1346		Adults >=15	Female	I or II	>349	653	1.78904		IPT and ART	0	No TB	0			Active	1.78904
Hospital	49	07	7.0049e+13	1377		Adults >=15	Female	I or II	>349	665	1.82192		IPT and ART	0	No TB	0			Active	1.82192
Hospital	59	14	140059006356108	1460		Adults >=15	Female	I or II	>349	693	1.89863		IPT and ART	0	No TB	0			Active	1.89863
Hospital	51	07	7.0051e+13	1595		Adults >=15	Female	I or II	>349	752	2.06027		IPT and ART	0	No TB	0			TO	2.06027
Hospital	49	07	7.0049e+13	1858		Adults >=15	Female	I or II	>349	888	2.43288		IPT and ART	0	No TB	0			Active	2.43288
Hospital	47	07	7.0047e+13	2104		Adults >=15	Female	I or II	>349	999	2.73699		IPT and ART	0	No TB	0			Active	2.73699
Hospital	21	12	120021007886081	2132		Adults >=15	Female	I or II	>349	1013	2.77534		IPT and ART	0	No TB	0			Active	2.77534
Hospital	47	07	7.0047e+13	2214		Adults >=15	Female	I or II	>349	1040	2.84932		IPT and ART	0	No TB	0			Active	2.84932
Hospital	21	12	120021007890583	2284		Adults >=15	Female	I or II	>349	1064	2.91507		IPT and ART	0	No TB	0			Active	2.91507
Hospital	59	14	140059007745003	2313		Adults >=15	Female	I or II	>349	1072	2.93699		IPT and ART	0	No TB	0			Active	2.93699
Hospital	59	14	140059007294377	2338		Adults >=15	Female	I or II	>349	1081	2.96164		IPT and ART	0	No TB	0			Active	2.96164
Hospital	117	14	140117007543803	2385		Adults >=15	Female	I or II	>349	1096	3.00274		IPT and ART	0	No TB	0			Active	3.00274
Hospital	59	14	140059008337588	2463		Adults >=15	Female	I or II	>349	1127	3.08767		IPT and ART	0	No TB	0			Active	3.08767
Hospital	110	07	7.011e+13	2554		Adults >=15	Female	I or II	>349	1159	3.17534		IPT and ART	0	No TB	0			Active	3.17534
Hospital	153	07	7.0153e+13	2595		Adults >=15	Female	I or II	>349	1172	3.21096		IPT and ART	0	No TB	0			Active	3.21096
Hospital	153	07	7.0153e+13	2670		Adults >=15	Female	I or II	>349	1200	3.28767		IPT and ART	0	No TB	0			Active	3.28767
Hospital	153	07	7.0153e+13	2773		Adults >=15	Female	I or II	>349	1238	3.39178		IPT and ART	0	No TB	0			Active	3.39178
Hospital	153	07	7.0153e+13	2853		Adults >=15	Female	I or II	>349	1259	3.44932		IPT and ART	0	No TB	0			Active	3.44932
Hospital	47	07	7.0047e+13	2943		Adults >=15	Female	I or II	>349	1284	3.51781		IPT and ART	0	No TB	0			Active	3.51781
Hospital	59	14	140059007232010	3023		Adults >=15	Female	I or II	>349	1312	3.59452		IPT and ART	0	No TB	0			Active	3.59452
Hospital	21	12	120021005337538	3057		Adults >=15	Female	I or II	>349	1323	3.62466		IPT and ART	0	No TB	0			Active	3.62466
Hospital	21	12	120021007550661	3108		Adults >=15	Female	I or II	>349	1338	3.66575		IPT and ART	0	No TB	0			Active	3.66575
Hospital	49	07	7.0049e+13	3166		Adults >=15	Female	I or II	>349	1356	3.71507		IPT and ART	0	No TB	0			Active	3.71507
Hospital	117	14	140117007690286	3280		Adults >=15	Female	I or II	>349	1390	3.80822		IPT and ART	0	No TB	0			Active	3.80822
Hospital	117	14	140117008283747	3494		Adults >=15	Female	I or II	>349	1465	4.0137		IPT and ART	0	No TB	0			Active	4.0137
Hospital	117	14	140117008264363	3719		Adults >=15	Female	I or II	>349	1542	4.22466		IPT and ART	0	No TB	0			Active	4.22466
Hospital	59	14	140059008736329	3912		Adults >=15	Female	I or II	>349	1620	4.43836		IPT and ART	0	No TB	0			Active	4.43836
Hospital	115	14	140115009098515	4237		Adults >=15	Female	I or II	>349	1821	4.98904		IPT and ART	0	No TB	0			LOST	4.98904
Hospital	115	14	140115008827468	4280		Adults >=15	Female	I or II	>349	1931	5.29041		IPT and ART	0	No TB	0			Active	5.29041
Hospital	115	14	140115007043160	4301		Adults >=15	Female	I or II	>349	1987	5.44384		IPT and ART	0	No TB	0			Active	5.44384
Hospital	115	14	140115008695841	4458		Adults >=15	Female	I or II	>349	2419	6.6274		IPT and ART	0	No TB	0			Active	6.6274
Hospital	47	07	7.0047e+13	727		Pediatric <15	Female	I or II	>349	389	1.06575		IPT and ART	0	No TB	0			Active	1.06575
Hospital	115	14	140115010347564	740		Pediatric <15	Female	I or II	>349	397	1.08767		IPT and ART	0	No TB	0			Active	1.08767
Hospital	47	07	7.0047e+13	954		Pediatric <15	Female	I or II	>349	497	1.36164		IPT and ART	0	No TB	0			Active	1.36164
Hospital	47	07	7.0047e+13	1047		Pediatric <15	Female	I or II	>349	522	1.43014		IPT and ART	0	No TB	0			Active	1.43014
Hospital	47	07	7.0047e+13	1059		Pediatric <15	Female	I or II	>349	527	1.44384		IPT and ART	0	No TB	0			Active	1.44384
Hospital	115	14	140115010331366	1323		Pediatric <15	Female	I or II	>349	645	1.76712		IPT and ART	0	No TB	0			Active	1.76712
Hospital	115	14	140115010334133	1332		Pediatric <15	Female	I or II	>349	648	1.77534		IPT and ART	0	No TB	0			Active	1.77534
Hospital	115	14	140115010311915	1347		Pediatric <15	Female	I or II	>349	654	1.79178		IPT and ART	0	No TB	0			Active	1.79178
Hospital	115	14	140115010342935	1415		Pediatric <15	Female	I or II	>349	675	1.84932		IPT and ART	0	No TB	0			Active	1.84932
Hospital	115	14	140115010335822	1420		Pediatric <15	Female	I or II	>349	678	1.85753		IPT and ART	0	No TB	0			Active	1.85753
Hospital	115	14	140115010311184	1424		Pediatric <15	Female	I or II	>349	680	1.86301		IPT and ART	0	No TB	0			Active	1.86301
Hospital	115	14	140115010334263	1425		Pediatric <15	Female	I or II	>349	681	1.86575		IPT and ART	0	No TB	0			Active	1.86575
Hospital	115	14	140115010315796	1445		Pediatric <15	Female	I or II	>349	687	1.88219		IPT and ART	0	No TB	0			Active	1.88219
Hospital	115	14	140115010348750	1472		Pediatric <15	Female	I or II	>349	700	1.91781		IPT and ART	0	No TB	0			Active	1.91781
Hospital	115	14	140115010309819	1518		Pediatric <15	Female	I or II	>349	721	1.97534		IPT and ART	0	No TB	0			Active	1.97534
Hospital	115	14	140115010313476	1571		Pediatric <15	Female	I or II	>349	746	2.04384		IPT and ART	0	No TB	0			Active	2.04384
Hospital	115	14	140115010325974	1573		Pediatric <15	Female	I or II	>349	746	2.04384		IPT and ART	0	No TB	0			Active	2.04384
Hospital	115	14	140115010332637	1629		Pediatric <15	Female	I or II	>349	770	2.10959		IPT and ART	0	No TB	0			Active	2.10959
Hospital	115	14	140115010349102	1630		Pediatric <15	Female	I or II	>349	770	2.10959		IPT and ART	0	No TB	0			Active	2.10959
Hospital	115	14	140115010344255	1640		Pediatric <15	Female	I or II	>349	774	2.12055		IPT and ART	0	No TB	0			Active	2.12055
Hospital	115	14	140115010347596	1746		Pediatric <15	Female	I or II	>349	825	2.26027		IPT and ART	0	No TB	0			Active	2.26027
Hospital	115	14	140115010332572	1751		Pediatric <15	Female	I or II	>349	831	2.27671		IPT and ART	0	No TB	0			Active	2.27671
Hospital	115	14	140115010342774	1815		Pediatric <15	Female	I or II	>349	864	2.36712		IPT and ART	0	No TB	0			Active	2.36712
Hospital	115	14	140115010332767	1947		Pediatric <15	Female	I or II	>349	935	2.56164		IPT and ART	0	No TB	0			Active	2.56164
Hospital	115	14	140115010318276	1949		Pediatric <15	Female	I or II	>349	937	2.56712		IPT and ART	0	No TB	0			Active	2.56712
Hospital	115	14	140115010336406	2011		Pediatric <15	Female	I or II	>349	961	2.63288		IPT and ART	0	No TB	0			Active	2.63288
Hospital	115	14	140115010324596	2441		Pediatric <15	Female	I or II	>349	1117	3.06027		IPT and ART	0	No TB	0			Active	3.06027
Hospital	115	14	140115010333645	2904		Pediatric <15	Female	I or II	>349	1272	3.48493		IPT and ART	0	No TB	0			Active	3.48493
Hospital	153	07	7.0153e+13	594		Adults >=15	Male	I or II	>349	332	0.909589		IPT and ART	0	No TB	0			Active	0.909589
Hospital	59	14	140059007263330	1733		Adults >=15	Male	I or II	>349	820	2.24658		IPT and ART	0	No TB	0			Active	2.24658
Hospital	47	07	7.0047e+13	2149		Adults >=15	Male	I or II	>349	1018	2.78904		IPT and ART	0	No TB	0			Active	2.78904
Hospital	21	12	120021007931644	2333		Adults >=15	Male	I or II	>349	1080	2.9589		IPT and ART	0	No TB	0			Active	2.9589
Hospital	21	12	120021006787845	2391		Adults >=15	Male	I or II	>349	1099	3.01096		IPT and ART	0	No TB	0			Active	3.01096
Hospital	49	07	7.0049e+13	2648		Adults >=15	Male	I or II	>349	1189	3.25753		IPT and ART	0	No TB	0			TO	3.25753
Hospital	115	14	140115009069007	4297		Adults >=15	Male	I or II	>349	1970	5.39726		IPT and ART	0	No TB	0			Active	5.39726
Hospital	59	14	140059007781973	4383		Adults >=15	Male	I or II	>349	2172	5.95068		IPT and ART	0	No TB	0			Active	5.95068
Hospital	47	07	7.0047e+13	952		Pediatric <15	Male	I or II	>349	496	1.3589		IPT and ART	0	No TB	0			Active	1.3589
Hospital	47	07	7.0047e+13	1052		Pediatric <15	Male	I or II	>349	523	1.43288		IPT and ART	0	No TB	0			Active	1.43288
Hospital	115	14	140115010339191	1127		Pediatric <15	Male	I or II	>349	558	1.52877		IPT and ART	0	No TB	0			Active	1.52877
Hospital	115	14	140115010335140	1187		Pediatric <15	Male	I or II	>349	580	1.58904		IPT and ART	0	No TB	0			Active	1.58904
Hospital	115	14	140115010331855	1299		Pediatric <15	Male	I or II	>349	632	1.73151		IPT and ART	0	No TB	0			Active	1.73151
Hospital	115	14	140115010343998	1320		Pediatric <15	Male	I or II	>349	644	1.76438		IPT and ART	0	No TB	0			Active	1.76438
Hospital	115	14	140115010329147	1426		Pediatric <15	Male	I or II	>349	681	1.86575		IPT and ART	0	No TB	0			Active	1.86575
Hospital	115	14	140115010312845	1444		Pediatric <15	Male	I or II	>349	687	1.88219		IPT and ART	0	No TB	0			Active	1.88219
Hospital	115	14	140115010313973	1453		Pediatric <15	Male	I or II	>349	692	1.89589		IPT and ART	0	No TB	0			Active	1.89589
Hospital	115	14	140115010340064	1479		Pediatric <15	Male	I or II	>349	703	1.92603		IPT and ART	0	No TB	0			Active	1.92603
Hospital	115	14	140115010318804	1483		Pediatric <15	Male	I or II	>349	704	1.92877		IPT and ART	0	No TB	0			Active	1.92877
Hospital	115	14	140115010336665	1507		Pediatric <15	Male	I or II	>349	713	1.95342		IPT and ART	0	No TB	0			Active	1.95342
Hospital	115	14	140115010310651	1540		Pediatric <15	Male	I or II	>349	730	2		IPT and ART	0	No TB	0			DROP	2
Hospital	115	14	140115010347917	1553		Pediatric <15	Male	I or II	>349	736	2.01644		IPT and ART	0	No TB	0			Active	2.01644
Hospital	115	14	140115010315332	1574		Pediatric <15	Male	I or II	>349	747	2.04658		IPT and ART	0	No TB	0			Active	2.04658
Hospital	115	14	140115010323217	1576		Pediatric <15	Male	I or II	>349	747	2.04658		IPT and ART	0	No TB	0			Active	2.04658
Hospital	115	14	140115010319332	1587		Pediatric <15	Male	I or II	>349	750	2.05479		IPT and ART	0	No TB	0			Active	2.05479
Hospital	115	14	140115010346441	1773		Pediatric <15	Male	I or II	>349	840	2.30137		IPT and ART	0	No TB	0			Active	2.30137
Hospital	115	14	140115010311350	1918		Pediatric <15	Male	I or II	>349	922	2.52603		IPT and ART	0	No TB	0			Active	2.52603
Hospital	115	14	140115010335367	2078		Pediatric <15	Male	I or II	>349	991	2.71507		IPT and ART	0	No TB	0			Active	2.71507
Hospital	115	14	140115010309852	2161		Pediatric <15	Male	I or II	>349	1022	2.8		IPT and ART	0	No TB	0			Active	2.8
Hospital	115	14	140115010336244	2253		Pediatric <15	Male	I or II	>349	1054	2.88767		IPT and ART	0	No TB	0			Active	2.88767
Hospital	115	14	140115010323349	2345		Pediatric <15	Male	I or II	>349	1083	2.96712		IPT and ART	0	No TB	0			Active	2.96712
Hospital	115	14	140115010310119	3293		Pediatric <15	Male	I or II	>349	1395	3.82192		IPT and ART	0	No TB	0			Active	3.82192
Hospital	51	07	7.0051e+13	35		Adults >=15	Female	III or IV	>349	28	0.0767123		IPT only	0	No TB	0				0.0767123
Hospital	153	07	7.0153e+13	28		Adults >=15	Male	III or IV	>349	28	0.0767123		IPT only	0	No TB	0				0.0767123
Hospital	21	12	120021007923710	365		Adults >=15	Female	III or IV	>349	198	0.542466		IPT and ART	0	No TB	0			DEAD	0.542466
Hospital	49	07	70049006570883	521		Adults >=15	Female	III or IV	>349	291	0.79726		IPT and ART	0	No TB	0			TO	0.79726
Hospital	153	07	7.0153e+13	529		Adults >=15	Female	III or IV	>349	295	0.808219		IPT and ART	0	No TB	0			DROP	0.808219
Hospital	59	14	140059007535297	755		Adults >=15	Female	III or IV	>349	404	1.10685		IPT and ART	0	No TB	0			DROP	1.10685
Hospital	271	07	7.0271e+13	763		Adults >=15	Female	III or IV	>349	411	1.12603		IPT and ART	0	No TB	0			Active	1.12603
Hospital	59	14	140059006533789	765		Adults >=15	Female	III or IV	>349	411	1.12603		IPT and ART	0	No TB	0			Active	1.12603
Hospital	21	12	120021008202208	789		Adults >=15	Female	III or IV	>349	419	1.14795		IPT and ART	0	No TB	0			Active	1.14795
Hospital	59	14	140059008293800	905		Adults >=15	Female	III or IV	>349	474	1.29863		IPT and ART	0	No TB	0			Active	1.29863
Hospital	21	12	120021007963112	1007		Adults >=15	Female	III or IV	>349	511	1.4		IPT and ART	0	No TB	0			Active	1.4
Hospital	110	07	7.011e+13	1081		Adults >=15	Female	III or IV	>349	535	1.46575		IPT and ART	0	No TB	0			TO	1.46575
Hospital	115	14	140115009038959	1324		Adults >=15	Female	III or IV	>349	646	1.76986		IPT and ART	0	No TB	0			Active	1.76986
Hospital	153	07	7.0153e+13	1734		Adults >=15	Female	III or IV	>349	821	2.24932		IPT and ART	0	No TB	0			Active	2.24932
Hospital	21	12	120021007608871	1826		Adults >=15	Female	III or IV	>349	872	2.38904		IPT and ART	0	No TB	0			Active	2.38904
Hospital	110	07	7.011e+13	1840		Adults >=15	Female	III or IV	>349	881	2.4137		IPT and ART	0	No TB	0			Active	2.4137
Hospital	47	07	7.0047e+13	1847		Adults >=15	Female	III or IV	>349	883	2.41918		IPT and ART	0	No TB	0			Active	2.41918
Hospital	49	07	7.0049e+13	1849		Adults >=15	Female	III or IV	>349	883	2.41918		IPT and ART	0	No TB	0			Active	2.41918
Hospital	21	12	120021007083388	1996		Adults >=15	Female	III or IV	>349	955	2.61644		IPT and ART	0	No TB	0			DROP	2.61644
Hospital	115	14	140115008946505	2003		Adults >=15	Female	III or IV	>349	958	2.62466		IPT and ART	0	No TB	0			DEAD	2.62466
Hospital	49	07	7.0049e+13	2070		Adults >=15	Female	III or IV	>349	987	2.70411		IPT and ART	0	No TB	0			TO	2.70411
Hospital	117	14	140117007679251	2075		Adults >=15	Female	III or IV	>349	990	2.71233		IPT and ART	0	No TB	0			Active	2.71233
Hospital	117	14	140117007313220	2102		Adults >=15	Female	III or IV	>349	999	2.73699		IPT and ART	0	No TB	0			TO	2.73699
Hospital	110	07	70110005424950	2139		Adults >=15	Female	III or IV	>349	1015	2.78082		IPT and ART	0	No TB	0			Active	2.78082
Hospital	110	07	7.011e+13	2147		Adults >=15	Female	III or IV	>349	1017	2.7863		IPT and ART	0	No TB	0			Active	2.7863
Hospital	21	12	120021007976252	2152		Adults >=15	Female	III or IV	>349	1019	2.79178		IPT and ART	0	No TB	0			Active	2.79178
Hospital	117	14	140117006845880	2157		Adults >=15	Female	III or IV	>349	1021	2.79726		IPT and ART	0	No TB	0			Active	2.79726
Hospital	59	14	140059007428927	2194		Adults >=15	Female	III or IV	>349	1032	2.8274		IPT and ART	0	No TB	0			Active	2.8274
Hospital	153	07	7.0153e+13	2285		Adults >=15	Female	III or IV	>349	1064	2.91507		IPT and ART	0	No TB	0			Active	2.91507
Hospital	115	14	140115008885994	2364		Adults >=15	Female	III or IV	>349	1088	2.98082		IPT and ART	0	No TB	0			Active	2.98082
Hospital	59	14	140059006388561	2439		Adults >=15	Female	III or IV	>349	1116	3.05753		IPT and ART	0	No TB	0			Active	3.05753
Hospital	110	07	7.011e+13	2524		Adults >=15	Female	III or IV	>349	1148	3.14521		IPT and ART	0	No TB	0			Active	3.14521
Hospital	153	07	7.0153e+13	2577		Adults >=15	Female	III or IV	>349	1167	3.19726		IPT and ART	0	No TB	0			Active	3.19726
Hospital	59	14	140059006871091	2623		Adults >=15	Female	III or IV	>349	1181	3.23562		IPT and ART	0	No TB	0			Active	3.23562
Hospital	21	12	120021007812378	2812		Adults >=15	Female	III or IV	>349	1250	3.42466		IPT and ART	0	No TB	0			Active	3.42466
Hospital	21	12	120021007605392	2907		Adults >=15	Female	III or IV	>349	1274	3.49041		IPT and ART	0	No TB	0			TO	3.49041
Hospital	59	14	140059003135494	2920		Adults >=15	Female	III or IV	>349	1277	3.49863		IPT and ART	0	No TB	0			Active	3.49863
Hospital	110	07	7.011e+13	2939		Adults >=15	Female	III or IV	>349	1283	3.51507		IPT and ART	0	No TB	0			Active	3.51507
Hospital	110	07	7.011e+13	2990		Adults >=15	Female	III or IV	>349	1301	3.56438		IPT and ART	0	No TB	0			Active	3.56438
Hospital	110	07	7.011e+13	3153		Adults >=15	Female	III or IV	>349	1352	3.70411		IPT and ART	0	No TB	0			Active	3.70411
Hospital	21	12	120021005726848	3220		Adults >=15	Female	III or IV	>349	1371	3.75616		IPT and ART	0	No TB	0			Active	3.75616
Hospital	21	12	120021007590347	3243		Adults >=15	Female	III or IV	>349	1378	3.77534		IPT and ART	0	No TB	0			Active	3.77534
Hospital	21	12	120021006788972	3248		Adults >=15	Female	III or IV	>349	1379	3.77808		IPT and ART	0	No TB	0			Active	3.77808
Hospital	21	12	120021005908083	3261		Adults >=15	Female	III or IV	>349	1383	3.78904		IPT and ART	0	No TB	0			Active	3.78904
Hospital	59	14	140059008214194	3284		Adults >=15	Female	III or IV	>349	1393	3.81644		IPT and ART	0	No TB	0			Active	3.81644
Hospital	110	07	7.011e+13	3316		Adults >=15	Female	III or IV	>349	1402	3.8411		IPT and ART	0	No TB	0			Active	3.8411
Hospital	110	07	70110006133398	3338		Adults >=15	Female	III or IV	>349	1409	3.86027		IPT and ART	0	No TB	0			Active	3.86027
Hospital	110	07	7.011e+13	3346		Adults >=15	Female	III or IV	>349	1412	3.86849		IPT and ART	0	No TB	0			Active	3.86849
Hospital	21	12	120021006996681	3362		Adults >=15	Female	III or IV	>349	1420	3.89041		IPT and ART	0	No TB	0			Active	3.89041
Hospital	110	07	7.011e+13	3429		Adults >=15	Female	III or IV	>349	1444	3.95616		IPT and ART	0	No TB	0			Active	3.95616
Hospital	21	12	120021005484797	3454		Adults >=15	Female	III or IV	>349	1452	3.97808		IPT and ART	0	No TB	0			Active	3.97808
Hospital	110	07	7.011e+13	3462		Adults >=15	Female	III or IV	>349	1457	3.99178		IPT and ART	0	No TB	0			Active	3.99178
Hospital	110	07	7.011e+13	3472		Adults >=15	Female	III or IV	>349	1460	4		IPT and ART	0	No TB	0			Active	4
Hospital	21	12	120021007583248	3683		Adults >=15	Female	III or IV	>349	1534	4.20274		IPT and ART	0	No TB	0			Active	4.20274
Hospital	21	12	120021003784190	3712		Adults >=15	Female	III or IV	>349	1539	4.21644		IPT and ART	0	No TB	0			Active	4.21644
Hospital	110	07	70110005926926	3722		Adults >=15	Female	III or IV	>349	1543	4.2274		IPT and ART	0	No TB	0			Active	4.2274
Hospital	110	07	7.011e+13	3805		Adults >=15	Female	III or IV	>349	1576	4.31781		IPT and ART	0	No TB	0			Active	4.31781
Hospital	117	14	140117006582025	3817		Adults >=15	Female	III or IV	>349	1582	4.33425		IPT and ART	0	No TB	0			Active	4.33425
Hospital	117	14	140117008045909	3982		Adults >=15	Female	III or IV	>349	1647	4.51233		IPT and ART	0	No TB	0			Active	4.51233
Hospital	59	14	140059003044522	4039		Adults >=15	Female	III or IV	>349	1667	4.56712		IPT and ART	0	No TB	0			Active	4.56712
Hospital	59	14	140059006670766	4053		Adults >=15	Female	III or IV	>349	1671	4.57808		IPT and ART	0	No TB	0			Active	4.57808
Hospital	117	14	140117007621195	4145		Adults >=15	Female	III or IV	>349	1707	4.67671		IPT and ART	0	No TB	0			Active	4.67671
Hospital	115	14	140115008439015	4470		Adults >=15	Female	III or IV	>349	2449	6.70959		IPT and ART	0	No TB	0			Active	6.70959
Hospital	115	14	140115010332962	505		Pediatric <15	Female	III or IV	>349	283	0.775342		IPT and ART	0	No TB	0			DROP	0.775342
Hospital	21	12	120021006897705	785		Pediatric <15	Female	III or IV	>349	419	1.14795		IPT and ART	0	No TB	0			Active	1.14795
Hospital	47	07	7.0047e+13	839		Pediatric <15	Female	III or IV	>349	439	1.20274		IPT and ART	0	No TB	0			Active	1.20274
Hospital	47	07	7.0047e+13	930		Pediatric <15	Female	III or IV	>349	486	1.33151		IPT and ART	0	No TB	0			Active	1.33151
Hospital	47	07	7.0047e+13	939		Pediatric <15	Female	III or IV	>349	490	1.34247		IPT and ART	0	No TB	0			Active	1.34247
Hospital	115	14	140115010315167	1172		Pediatric <15	Female	III or IV	>349	576	1.57808		IPT and ART	0	No TB	0			Active	1.57808
Hospital	115	14	140115010321573	1200		Pediatric <15	Female	III or IV	>349	585	1.60274		IPT and ART	0	No TB	0			TO	1.60274
Hospital	115	14	140115010320156	1264		Pediatric <15	Female	III or IV	>349	609	1.66849		IPT and ART	0	No TB	0			Active	1.66849
Hospital	115	14	140115010326793	1361		Pediatric <15	Female	III or IV	>349	660	1.80822		IPT and ART	0	No TB	0			Active	1.80822
Hospital	115	14	140115010315531	1365		Pediatric <15	Female	III or IV	>349	661	1.81096		IPT and ART	0	No TB	0			Active	1.81096
Hospital	115	14	140115010313542	1387		Pediatric <15	Female	III or IV	>349	669	1.83288		IPT and ART	0	No TB	0			Active	1.83288
Hospital	115	14	140115010322329	1402		Pediatric <15	Female	III or IV	>349	673	1.84384		IPT and ART	0	No TB	0			LOST	1.84384
Hospital	115	14	140115010312081	1436		Pediatric <15	Female	III or IV	>349	685	1.87671		IPT and ART	0	No TB	0			Active	1.87671
Hospital	115	14	140115010326203	1454		Pediatric <15	Female	III or IV	>349	692	1.89589		IPT and ART	0	No TB	0			Active	1.89589
Hospital	115	14	140115010314106	1487		Pediatric <15	Female	III or IV	>349	704	1.92877		IPT and ART	0	No TB	0			Active	1.92877
Hospital	115	14	140115010322033	1505		Pediatric <15	Female	III or IV	>349	712	1.95068		IPT and ART	0	No TB	0			Active	1.95068
Hospital	115	14	140115010341420	1531		Pediatric <15	Female	III or IV	>349	728	1.99452		IPT and ART	0	No TB	0			Active	1.99452
Hospital	115	14	140115010343934	1593		Pediatric <15	Female	III or IV	>349	752	2.06027		IPT and ART	0	No TB	0			Active	2.06027
Hospital	115	14	140115010334328	1596		Pediatric <15	Female	III or IV	>349	754	2.06575		IPT and ART	0	No TB	0			Active	2.06575
Hospital	115	14	140115010309952	1606		Pediatric <15	Female	III or IV	>349	756	2.07123		IPT and ART	0	No TB	0			Active	2.07123
Hospital	115	14	140115010324334	1611		Pediatric <15	Female	III or IV	>349	759	2.07945		IPT and ART	0	No TB	0			Active	2.07945
Hospital	115	14	140115010321803	1617		Pediatric <15	Female	III or IV	>349	763	2.09041		IPT and ART	0	No TB	0			Active	2.09041
Hospital	21	12	120021007669495	1979		Pediatric <15	Female	III or IV	>349	951	2.60548		IPT and ART	0	No TB	0			TO	2.60548
Hospital	115	14	140115010344191	2177		Pediatric <15	Female	III or IV	>349	1026	2.81096		IPT and ART	0	No TB	0			Active	2.81096
Hospital	115	14	140115010316425	2191		Pediatric <15	Female	III or IV	>349	1031	2.82466		IPT and ART	0	No TB	0			Active	2.82466
Hospital	115	14	140115010342130	2980		Pediatric <15	Female	III or IV	>349	1297	3.55342		IPT and ART	0	No TB	0			Active	3.55342
Hospital	115	14	140115010333970	3460		Pediatric <15	Female	III or IV	>349	1456	3.98904		IPT and ART	0	No TB	0			Active	3.98904
Hospital	110	07	7.011e+13	367		Adults >=15	Male	III or IV	>349	198	0.542466		IPT and ART	0	No TB	0			DEAD	0.542466
Hospital	110	07	70110005049856	452		Adults >=15	Male	III or IV	>349	255	0.69863		IPT and ART	0	No TB	0			DROP	0.69863
Hospital	21	12	120021008181161	538		Adults >=15	Male	III or IV	>349	298	0.816438		IPT and ART	0	No TB	0			DROP	0.816438
Hospital	21	12	120021008125039	550		Adults >=15	Male	III or IV	>349	304	0.832877		IPT and ART	0	No TB	0			DEAD	0.832877
Hospital	47	07	7.0047e+13	679		Adults >=15	Male	III or IV	>349	368	1.00822		IPT and ART	0	No TB	0			TO	1.00822
Hospital	117	14	140117007519692	969		Adults >=15	Male	III or IV	>349	502	1.37534		IPT and ART	0	No TB	0			Active	1.37534
Hospital	115	14	140115005123964	1794		Adults >=15	Male	III or IV	>349	853	2.33699		IPT and ART	0	No TB	0			Active	2.33699
Hospital	110	07	7.011e+13	1902		Adults >=15	Male	III or IV	>349	912	2.49863		IPT and ART	0	No TB	0			Active	2.49863
Hospital	51	07	7.0051e+13	2017		Adults >=15	Male	III or IV	>349	964	2.6411		IPT and ART	0	No TB	0			Active	2.6411
Hospital	59	14	140059008085179	2061		Adults >=15	Male	III or IV	>349	984	2.69589		IPT and ART	0	No TB	0			Active	2.69589
Hospital	21	12	120021007932721	2270		Adults >=15	Male	III or IV	>349	1059	2.90137		IPT and ART	0	No TB	0			Active	2.90137
Hospital	59	14	140059007559560	2280		Adults >=15	Male	III or IV	>349	1063	2.91233		IPT and ART	0	No TB	0			Active	2.91233
Hospital	59	14	140059001609438	2370		Adults >=15	Male	III or IV	>349	1092	2.99178		IPT and ART	0	No TB	0			Active	2.99178
Hospital	47	07	7.0047e+13	2387		Adults >=15	Male	III or IV	>349	1098	3.00822		IPT and ART	0	No TB	0			Active	3.00822
Hospital	176	07	7.0176e+13	2403		Adults >=15	Male	III or IV	>349	1104	3.02466		IPT and ART	0	No TB	0			Active	3.02466
Hospital	59	14	140059005164786	2547		Adults >=15	Male	III or IV	>349	1156	3.16712		IPT and ART	0	No TB	0			Active	3.16712
Hospital	110	07	70110006453625	2561		Adults >=15	Male	III or IV	>349	1161	3.18082		IPT and ART	0	No TB	0			Active	3.18082
Hospital	21	12	120021007581210	2620		Adults >=15	Male	III or IV	>349	1180	3.23288		IPT and ART	0	No TB	0			TO	3.23288
Hospital	153	07	7.0153e+13	2714		Adults >=15	Male	III or IV	>349	1219	3.33973		IPT and ART	0	No TB	0			Active	3.33973
Hospital	110	07	7.011e+13	2753		Adults >=15	Male	III or IV	>349	1234	3.38082		IPT and ART	0	No TB	0			Active	3.38082
Hospital	110	07	7.011e+13	2764		Adults >=15	Male	III or IV	>349	1236	3.3863		IPT and ART	0	No TB	0			Active	3.3863
Hospital	59	14	140059008080547	2798		Adults >=15	Male	III or IV	>349	1245	3.41096		IPT and ART	0	No TB	0			Active	3.41096
Hospital	59	14	140059005247024	2860		Adults >=15	Male	III or IV	>349	1260	3.45205		IPT and ART	0	No TB	0			Active	3.45205
Hospital	21	12	120021007523481	2861		Adults >=15	Male	III or IV	>349	1260	3.45205		IPT and ART	0	No TB	0			Active	3.45205
Hospital	59	14	140059004369448	2968		Adults >=15	Male	III or IV	>349	1292	3.53973		IPT and ART	0	No TB	0			Active	3.53973
Hospital	110	07	7.011e+13	3252		Adults >=15	Male	III or IV	>349	1380	3.78082		IPT and ART	0	No TB	0			Active	3.78082
Hospital	153	07	7.0153e+13	3255		Adults >=15	Male	III or IV	>349	1381	3.78356		IPT and ART	0	No TB	0			Active	3.78356
Hospital	59	14	140059003218876	3633		Adults >=15	Male	III or IV	>349	1518	4.1589		IPT and ART	0	No TB	0			Active	4.1589
Hospital	117	14	140117008057061	3878		Adults >=15	Male	III or IV	>349	1606	4.4		IPT and ART	0	No TB	0			Active	4.4
Hospital	110	07	7.011e+13	3949		Adults >=15	Male	III or IV	>349	1634	4.47671		IPT and ART	0	No TB	0			Active	4.47671
Hospital	47	07	7.0047e+13	4077		Adults >=15	Male	III or IV	>349	1680	4.60274		IPT and ART	0	No TB	0			Active	4.60274
Hospital	110	07	7.011e+13	4231		Adults >=15	Male	III or IV	>349	1790	4.90411		IPT and ART	0	No TB	0			Active	4.90411
Hospital	59	14	140059006079933	4275		Adults >=15	Male	III or IV	>349	1913	5.2411		IPT and ART	0	No TB	0			Active	5.2411
Hospital	117	14	140117007734996	4313		Adults >=15	Male	III or IV	>349	2008	5.50137		IPT and ART	0	No TB	0			Active	5.50137
Hospital	51	07	7.0051e+13	4351		Adults >=15	Male	III or IV	>349	2074	5.68219		IPT and ART	0	No TB	0			Active	5.68219
Hospital	59	14	140059007796058	4382		Adults >=15	Male	III or IV	>349	2171	5.94795		IPT and ART	0	No TB	0			DROP	5.94795
Hospital	115	14	140115006829794	4442		Adults >=15	Male	III or IV	>349	2363	6.47397		IPT and ART	0	No TB	0			Active	6.47397
Hospital	115	14	140115010316524	770		Pediatric <15	Male	III or IV	>349	413	1.13151		IPT and ART	0	No TB	0			DROP	1.13151
Hospital	115	14	140115010310019	959		Pediatric <15	Male	III or IV	>349	498	1.36438		IPT and ART	0	No TB	0			Active	1.36438
Hospital	47	07	7.0047e+13	994		Pediatric <15	Male	III or IV	>349	507	1.38904		IPT and ART	0	No TB	0			Active	1.38904
Hospital	47	07	70047006453625	1026		Pediatric <15	Male	III or IV	>349	516	1.4137		IPT and ART	0	No TB	0			Active	1.4137
Hospital	115	14	140115010317185	1176		Pediatric <15	Male	III or IV	>349	576	1.57808		IPT and ART	0	No TB	0			Active	1.57808
Hospital	115	14	140115010318672	1216		Pediatric <15	Male	III or IV	>349	591	1.61918		IPT and ART	0	No TB	0			Active	1.61918
Hospital	115	14	140115010325908	1333		Pediatric <15	Male	III or IV	>349	648	1.77534		IPT and ART	0	No TB	0			Active	1.77534
Hospital	115	14	140115010333092	1335		Pediatric <15	Male	III or IV	>349	648	1.77534		IPT and ART	0	No TB	0			Active	1.77534
Hospital	115	14	140115010315100	1338		Pediatric <15	Male	III or IV	>349	649	1.77808		IPT and ART	0	No TB	0			Active	1.77808
Hospital	115	14	140115010338382	1551		Pediatric <15	Male	III or IV	>349	735	2.0137		IPT and ART	0	No TB	0			Active	2.0137
Hospital	115	14	140115010319992	1597		Pediatric <15	Male	III or IV	>349	754	2.06575		IPT and ART	0	No TB	0			Active	2.06575
Hospital	115	14	140115010312646	1600		Pediatric <15	Male	III or IV	>349	755	2.06849		IPT and ART	0	No TB	0			Active	2.06849
Hospital	115	14	140115010323020	1639		Pediatric <15	Male	III or IV	>349	773	2.11781		IPT and ART	0	No TB	0			Active	2.11781
Hospital	115	14	140115010332116	1720		Pediatric <15	Male	III or IV	>349	815	2.23288		IPT and ART	0	No TB	0			Active	2.23288
Hospital	115	14	140115010311416	1767		Pediatric <15	Male	III or IV	>349	839	2.29863		IPT and ART	0	No TB	0			Active	2.29863
Hospital	115	14	140115010314868	1772		Pediatric <15	Male	III or IV	>349	840	2.30137		IPT and ART	0	No TB	0			Active	2.30137
Hospital	110	07	7.011e+13	1822		Pediatric <15	Male	III or IV	>349	868	2.37808		IPT and ART	0	No TB	0			Active	2.37808
Hospital	115	14	140115010311981	1913		Pediatric <15	Male	III or IV	>349	920	2.52055		IPT and ART	0	No TB	0			Active	2.52055
Hospital	47	07	7.0047e+13	4277		Pediatric <15	Male	III or IV	>349	1923	5.26849		IPT and ART	0	No TB	0			LOST	5.26849
Hospital	21	12	120021008042056	30		Adults >=15	Male	III or IV	>349	28	0.0767123		IPT only	0	No TB	0				0.0767123
Hospital	21	12	120021008172729	25		Adults >=15	Female	III or IV	100-349	28	0.0767123		IPT only	0	No TB	0				0.0767123
Hospital	21	12	120021008102889	24		Adults >=15	Male	III or IV	100-349	28	0.0767123		IPT only	0	No TB	0				0.0767123
Hospital	21	12	120021008202756	31		Adults >=15	Male	III or IV	100-349	28	0.0767123		IPT only	0	No TB	0				0.0767123
Hospital	21	12	120021007940584	32		Adults >=15	Male	III or IV	100-349	28	0.0767123		IPT only	0	No TB	0				0.0767123
Hospital	21	12	120021008244334	33		Adults >=15	Male	III or IV	100-349	28	0.0767123		IPT only	0	No TB	0				0.0767123
Hospital	21	12	120021007929487	34		Pediatric <15	Male	III or IV	100-349	28	0.0767123		IPT only	0	No TB	0				0.0767123
Hospital	59	14	140059007480992	38		Adults >=15	Male	III or IV	<100	29	0.0794521		IPT and ART	0	No TB	0				0.0794521
Hospital	21	12	120021008197814	44		Adults >=15	Male	I or II	>349	29	0.0794521		IPT only	0	No TB	0				0.0794521
Hospital	21	12	120021008042700	37		Adults >=15	Female	III or IV	>349	29	0.0794521		IPT only	0	No TB	0				0.0794521
Hospital	21	12	120021008060224	39		Adults >=15	Female	III or IV	>349	29	0.0794521		IPT only	0	No TB	0				0.0794521
Hospital	117	14	140117007324490	335		Adults >=15	Female	I or II	100-349	183	0.50137		IPT and ART	0	No TB	0			TO	0.50137
Hospital	21	12	120021007879291	340		Adults >=15	Female	I or II	100-349	185	0.506849		IPT and ART	0	No TB	0			TO	0.506849
Hospital	117	14	140117008090096	351		Adults >=15	Female	I or II	100-349	190	0.520548		IPT and ART	0	No TB	0			DROP	0.520548
Hospital	117	14	140117008170751	352		Adults >=15	Female	I or II	100-349	190	0.520548		IPT and ART	0	No TB	0			TO	0.520548
Hospital	117	14	140117008145840	392		Adults >=15	Female	I or II	100-349	211	0.578082		IPT and ART	0	No TB	0			TO	0.578082
Hospital	21	12	120021007816014	402		Adults >=15	Female	I or II	100-349	219	0.6		IPT and ART	0	No TB	0			DROP	0.6
Hospital	49	07	7.0049e+13	428		Adults >=15	Female	I or II	100-349	243	0.665753		IPT and ART	0	No TB	0			TO	0.665753
Hospital	49	07	7.0049e+13	435		Adults >=15	Female	I or II	100-349	247	0.676712		IPT and ART	0	No TB	0			DROP	0.676712
Hospital	21	12	120021008012681	436		Adults >=15	Female	I or II	100-349	247	0.676712		IPT and ART	0	No TB	0			DROP	0.676712
Hospital	21	12	120021008152486	440		Adults >=15	Female	I or II	100-349	250	0.684932		IPT and ART	0	No TB	0			TO	0.684932
Hospital	271	07	7.0271e+13	448		Adults >=15	Female	I or II	100-349	253	0.693151		IPT and ART	0	No TB	0			TO	0.693151
Hospital	21	12	120021007964851	457		Adults >=15	Female	I or II	100-349	259	0.709589		IPT and ART	0	No TB	0			DROP	0.709589
Hospital	115	14	140115009198976	463		Adults >=15	Female	I or II	100-349	263	0.720548		IPT and ART	0	No TB	0			TO	0.720548
Hospital	117	14	140117006070738	464		Adults >=15	Female	I or II	100-349	265	0.726027		IPT and ART	0	No TB	0			TO	0.726027
Hospital	176	07	7.0176e+13	484		Adults >=15	Female	I or II	100-349	273	0.747945		IPT and ART	0	No TB	0			Active	0.747945
Hospital	117	14	140117008260493	493		Adults >=15	Female	I or II	100-349	277	0.758904		IPT and ART	0	No TB	0			TO	0.758904
Hospital	21	12	120021007901748	498		Adults >=15	Female	I or II	100-349	279	0.764384		IPT and ART	0	No TB	0			TO	0.764384
Hospital	271	07	7.0271e+13	500		Adults >=15	Female	I or II	100-349	281	0.769863		IPT and ART	0	No TB	0			TO	0.769863
Hospital	153	07	7.0153e+13	515		Adults >=15	Female	I or II	100-349	286	0.783562		IPT and ART	0	No TB	0			TO	0.783562
Hospital	176	07	7.0176e+13	526		Adults >=15	Female	I or II	100-349	293	0.80274		IPT and ART	0	No TB	0			Active	0.80274
Hospital	49	07	7.0049e+13	544		Adults >=15	Female	I or II	100-349	300	0.821918		IPT and ART	0	No TB	0			TO	0.821918
Hospital	117	14	140117007290293	545		Adults >=15	Female	I or II	100-349	300	0.821918		IPT and ART	0	No TB	0			DROP	0.821918
Hospital	21	12	120021008021585	551		Adults >=15	Female	I or II	100-349	304	0.832877		IPT and ART	0	No TB	0			DROP	0.832877
Hospital	21	12	120021008165079	554		Adults >=15	Female	I or II	100-349	306	0.838356		IPT and ART	0	No TB	0			Active	0.838356
Hospital	21	12	120021007727976	561		Adults >=15	Female	I or II	100-349	312	0.854795		IPT and ART	0	No TB	0			TO	0.854795
Hospital	21	12	120021008242493	562		Adults >=15	Female	I or II	100-349	313	0.857534		IPT and ART	0	No TB	0			Active	0.857534
Hospital	176	07	7.0176e+13	572		Adults >=15	Female	I or II	100-349	321	0.879452		IPT and ART	0	No TB	0			LOST	0.879452
Hospital	21	12	120021007862497	573		Adults >=15	Female	I or II	100-349	321	0.879452		IPT and ART	0	No TB	0			DROP	0.879452
Hospital	271	07	7.0271e+13	579		Adults >=15	Female	I or II	100-349	325	0.890411		IPT and ART	0	No TB	0			Active	0.890411
Hospital	21	12	120021007981392	580		Adults >=15	Female	I or II	100-349	326	0.893151		IPT and ART	0	No TB	0			DROP	0.893151
Hospital	21	12	120021008025189	587		Adults >=15	Female	I or II	100-349	328	0.89863		IPT and ART	0	No TB	0			DROP	0.89863
Hospital	21	12	120021008181441	588		Adults >=15	Female	I or II	100-349	328	0.89863		IPT and ART	0	No TB	0			DROP	0.89863
Hospital	21	12	120021008236421	616		Adults >=15	Female	I or II	100-349	343	0.939726		IPT and ART	0	No TB	0			Active	0.939726
Hospital	49	07	7.0049e+13	620		Adults >=15	Female	I or II	100-349	345	0.945205		IPT and ART	0	No TB	0			Active	0.945205
Hospital	271	07	7.0271e+13	621		Adults >=15	Female	I or II	100-349	345	0.945205		IPT and ART	0	No TB	0			Active	0.945205
Hospital	49	07	7.0049e+13	629		Adults >=15	Female	I or II	100-349	350	0.958904		IPT and ART	0	No TB	0			Active	0.958904
Hospital	47	07	7.0047e+13	630		Adults >=15	Female	I or II	100-349	350	0.958904		IPT and ART	0	No TB	0			Active	0.958904
Hospital	51	07	7.0051e+13	638		Adults >=15	Female	I or II	100-349	353	0.967123		IPT and ART	0	No TB	0			TO	0.967123
Hospital	153	07	7.0153e+13	640		Adults >=15	Female	I or II	100-349	354	0.969863		IPT and ART	0	No TB	0			TO	0.969863
Hospital	49	07	7.0049e+13	641		Adults >=15	Female	I or II	100-349	355	0.972603		IPT and ART	0	No TB	0			Active	0.972603
Hospital	49	07	7.0049e+13	646		Adults >=15	Female	I or II	100-349	357	0.978082		IPT and ART	0	No TB	0			Active	0.978082
Hospital	49	07	7.0049e+13	647		Adults >=15	Female	I or II	100-349	357	0.978082		IPT and ART	0	No TB	0			TO	0.978082
Hospital	271	07	7.0271e+13	654		Adults >=15	Female	I or II	100-349	361	0.989041		IPT and ART	0	No TB	0			Active	0.989041
Hospital	115	14	140115009330787	655		Adults >=15	Female	I or II	100-349	361	0.989041		IPT and ART	0	No TB	0			DROP	0.989041
Hospital	59	14	140059008309185	670		Adults >=15	Female	I or II	100-349	365	1		IPT and ART	0	No TB	0			Active	1
Hospital	271	07	7.0271e+13	698		Adults >=15	Female	I or II	100-349	374	1.02466		IPT and ART	0	No TB	0			DROP	1.02466
Hospital	21	12	120021007667626	700		Adults >=15	Female	I or II	100-349	375	1.0274		IPT and ART	0	No TB	0			TO	1.0274
Hospital	49	07	7.0049e+13	715		Adults >=15	Female	I or II	100-349	381	1.04384		IPT and ART	0	No TB	0			TO	1.04384
Hospital	51	07	7.0051e+13	721		Adults >=15	Female	I or II	100-349	387	1.06027		IPT and ART	0	No TB	0			TO	1.06027
Hospital	271	07	7.0271e+13	724		Adults >=15	Female	I or II	100-349	387	1.06027		IPT and ART	0	No TB	0			Active	1.06027
Hospital	21	12	120021008210668	725		Adults >=15	Female	I or II	100-349	387	1.06027		IPT and ART	0	No TB	0			Active	1.06027
Hospital	271	07	7.0271e+13	730		Adults >=15	Female	I or II	100-349	392	1.07397		IPT and ART	0	No TB	0			Active	1.07397
Hospital	117	14	140117007438972	733		Adults >=15	Female	I or II	100-349	393	1.07671		IPT and ART	0	No TB	0			DROP	1.07671
Hospital	115	14	140115008801921	750		Adults >=15	Female	I or II	100-349	401	1.09863		IPT and ART	0	No TB	0			DROP	1.09863
Hospital	59	14	140059007969704	753		Adults >=15	Female	I or II	100-349	404	1.10685		IPT and ART	0	No TB	0			Active	1.10685
Hospital	49	07	70049006894670	773		Adults >=15	Female	I or II	100-349	414	1.13425		IPT and ART	0	No TB	0			TO	1.13425
Hospital	271	07	70271007185387	775		Adults >=15	Female	I or II	100-349	416	1.13973		IPT and ART	0	No TB	0			Active	1.13973
Hospital	21	12	120021006426488	777		Adults >=15	Female	I or II	100-349	416	1.13973		IPT and ART	0	No TB	0			DROP	1.13973
Hospital	271	07	7.0271e+13	778		Adults >=15	Female	I or II	100-349	417	1.14247		IPT and ART	0	No TB	0			Active	1.14247
Hospital	49	07	70049007820038	784		Adults >=15	Female	I or II	100-349	419	1.14795		IPT and ART	0	No TB	0			Active	1.14795
Hospital	117	14	140117008038512	792		Adults >=15	Female	I or II	100-349	420	1.15068		IPT and ART	0	No TB	0			Active	1.15068
Hospital	115	14	140115009383789	793		Adults >=15	Female	I or II	100-349	421	1.15342		IPT and ART	0	No TB	0			Active	1.15342
Hospital	49	07	7.0049e+13	805		Adults >=15	Female	I or II	100-349	423	1.1589		IPT and ART	0	No TB	0			Active	1.1589
Hospital	176	07	70176005049856	806		Adults >=15	Female	I or II	100-349	423	1.1589		IPT and ART	0	No TB	0			Active	1.1589
Hospital	59	14	140059007644919	815		Adults >=15	Female	I or II	100-349	427	1.16986		IPT and ART	0	No TB	0			TO	1.16986
Hospital	153	07	7.0153e+13	826		Adults >=15	Female	I or II	100-349	433	1.1863		IPT and ART	0	No TB	0			TO	1.1863
Hospital	59	14	140059007896181	827		Adults >=15	Female	I or II	100-349	434	1.18904		IPT and ART	0	No TB	0			DROP	1.18904
Hospital	117	14	140117008276140	830		Adults >=15	Female	I or II	100-349	435	1.19178		IPT and ART	0	No TB	0			DROP	1.19178
Hospital	271	07	70271006565265	851		Adults >=15	Female	I or II	100-349	443	1.2137		IPT and ART	0	No TB	0			Active	1.2137
Hospital	59	14	140059008187299	852		Adults >=15	Female	I or II	100-349	443	1.2137		IPT and ART	0	No TB	0			Active	1.2137
Hospital	176	07	7.0176e+13	856		Adults >=15	Female	I or II	100-349	446	1.22192		IPT and ART	0	No TB	0			Active	1.22192
Hospital	271	07	7.0271e+13	861		Adults >=15	Female	I or II	100-349	450	1.23288		IPT and ART	0	No TB	0			Active	1.23288
Hospital	59	14	140059008347353	863		Adults >=15	Female	I or II	100-349	450	1.23288		IPT and ART	0	No TB	0			Active	1.23288
Hospital	21	12	120021008065894	872		Adults >=15	Female	I or II	100-349	455	1.24658		IPT and ART	0	No TB	0			DROP	1.24658
Hospital	21	12	120021007751475	876		Adults >=15	Female	I or II	100-349	460	1.26027		IPT and ART	0	No TB	0			TO	1.26027
Hospital	153	07	70153006228511	889		Adults >=15	Female	I or II	100-349	466	1.27671		IPT and ART	0	No TB	0			DEAD	1.27671
Hospital	115	14	140115009187379	890		Adults >=15	Female	I or II	100-349	467	1.27945		IPT and ART	0	No TB	0			Active	1.27945
Hospital	59	14	140059007831220	904		Adults >=15	Female	I or II	100-349	472	1.29315		IPT and ART	0	No TB	0			Active	1.29315
Hospital	271	07	7.0271e+13	912		Adults >=15	Female	I or II	100-349	478	1.30959		IPT and ART	0	No TB	0			Active	1.30959
Hospital	21	12	120021008065579	914		Adults >=15	Female	I or II	100-349	479	1.31233		IPT and ART	0	No TB	0			Active	1.31233
Hospital	21	12	120021008025843	916		Adults >=15	Female	I or II	100-349	480	1.31507		IPT and ART	0	No TB	0			Active	1.31507
Hospital	117	14	140117008190909	921		Adults >=15	Female	I or II	100-349	481	1.31781		IPT and ART	0	No TB	0			TO	1.31781
Hospital	115	14	140115006327937	929		Adults >=15	Female	I or II	100-349	485	1.32877		IPT and ART	0	No TB	0			Active	1.32877
Hospital	271	07	7.0271e+13	932		Adults >=15	Female	I or II	100-349	488	1.33699		IPT and ART	0	No TB	0			Active	1.33699
Hospital	271	07	7.0271e+13	933		Adults >=15	Female	I or II	100-349	488	1.33699		IPT and ART	0	No TB	0			Active	1.33699
Hospital	21	12	120021008029759	940		Adults >=15	Female	I or II	100-349	491	1.34521		IPT and ART	0	No TB	0			Active	1.34521
Hospital	51	07	7.0051e+13	950		Adults >=15	Female	I or II	100-349	494	1.35342		IPT and ART	0	No TB	0			TO	1.35342
Hospital	117	14	140117008082093	961		Adults >=15	Female	I or II	100-349	500	1.36986		IPT and ART	0	No TB	0			TO	1.36986
Hospital	115	14	140115007798113	996		Adults >=15	Female	I or II	100-349	507	1.38904		IPT and ART	0	No TB	0			Active	1.38904
Hospital	59	14	140059008238537	999		Adults >=15	Female	I or II	100-349	508	1.39178		IPT and ART	0	No TB	0			Active	1.39178
Hospital	110	07	7.011e+13	1003		Adults >=15	Female	I or II	100-349	509	1.39452		IPT and ART	0	No TB	0			TO	1.39452
Hospital	21	12	120021008163941	1018		Adults >=15	Female	I or II	100-349	515	1.41096		IPT and ART	0	No TB	0			Active	1.41096
Hospital	49	07	7.0049e+13	1024		Adults >=15	Female	I or II	100-349	515	1.41096		IPT and ART	0	No TB	0			Active	1.41096
Hospital	271	07	7.0271e+13	1027		Adults >=15	Female	I or II	100-349	516	1.4137		IPT and ART	0	No TB	0			Active	1.4137
Hospital	49	07	7.0049e+13	1036		Adults >=15	Female	I or II	100-349	518	1.41918		IPT and ART	0	No TB	0			Active	1.41918
Hospital	271	07	7.0271e+13	1045		Adults >=15	Female	I or II	100-349	522	1.43014		IPT and ART	0	No TB	0			Active	1.43014
Hospital	49	07	7.0049e+13	1051		Adults >=15	Female	I or II	100-349	523	1.43288		IPT and ART	0	No TB	0			Active	1.43288
Hospital	271	07	7.0271e+13	1056		Adults >=15	Female	I or II	100-349	527	1.44384		IPT and ART	0	No TB	0			Active	1.44384
Hospital	21	12	120021007788212	1063		Adults >=15	Female	I or II	100-349	529	1.44932		IPT and ART	0	No TB	0			DEAD	1.44932
Hospital	49	07	7.0049e+13	1072		Adults >=15	Female	I or II	100-349	531	1.45479		IPT and ART	0	No TB	0			TO	1.45479
Hospital	21	12	120021008157944	1082		Adults >=15	Female	I or II	100-349	535	1.46575		IPT and ART	0	No TB	0			Active	1.46575
Hospital	21	12	120021007503841	1086		Adults >=15	Female	I or II	100-349	538	1.47397		IPT and ART	0	No TB	0			DROP	1.47397
Hospital	115	14	140115009113168	1091		Adults >=15	Female	I or II	100-349	540	1.47945		IPT and ART	0	No TB	0			DROP	1.47945
Hospital	21	12	120021008152774	1092		Adults >=15	Female	I or II	100-349	540	1.47945		IPT and ART	0	No TB	0			Active	1.47945
Hospital	117	14	140117007981733	1095		Adults >=15	Female	I or II	100-349	542	1.48493		IPT and ART	0	No TB	0			DROP	1.48493
Hospital	21	12	120021007715570	1112		Adults >=15	Female	I or II	100-349	551	1.50959		IPT and ART	0	No TB	0			DROP	1.50959
Hospital	176	07	7.0176e+13	1115		Adults >=15	Female	I or II	100-349	553	1.51507		IPT and ART	0	No TB	0			Active	1.51507
Hospital	115	14	140115009212139	1116		Adults >=15	Female	I or II	100-349	553	1.51507		IPT and ART	0	No TB	0			Active	1.51507
Hospital	271	07	7.0271e+13	1119		Adults >=15	Female	I or II	100-349	555	1.52055		IPT and ART	0	No TB	0			TO	1.52055
Hospital	49	07	7.0049e+13	1120		Adults >=15	Female	I or II	100-349	555	1.52055		IPT and ART	0	No TB	0			TO	1.52055
Hospital	153	07	7.0153e+13	1122		Adults >=15	Female	I or II	100-349	556	1.52329		IPT and ART	0	No TB	0			TO	1.52329
Hospital	21	12	120021005834811	1131		Adults >=15	Female	I or II	100-349	559	1.53151		IPT and ART	0	No TB	0			Active	1.53151
Hospital	115	14	140115009372714	1136		Adults >=15	Female	I or II	100-349	561	1.53699		IPT and ART	0	No TB	0			Active	1.53699
Hospital	21	12	120021008051022	1151		Adults >=15	Female	I or II	100-349	568	1.55616		IPT and ART	0	No TB	0			Active	1.55616
Hospital	21	12	120021007893199	1168		Adults >=15	Female	I or II	100-349	572	1.56712		IPT and ART	0	No TB	0			Active	1.56712
Hospital	271	07	7.0271e+13	1177		Adults >=15	Female	I or II	100-349	576	1.57808		IPT and ART	0	No TB	0			Active	1.57808
Hospital	115	14	140115008881142	1195		Adults >=15	Female	I or II	100-349	583	1.59726		IPT and ART	0	No TB	0			DROP	1.59726
Hospital	271	07	7.0271e+13	1204		Adults >=15	Female	I or II	100-349	586	1.60548		IPT and ART	0	No TB	0			TO	1.60548
Hospital	21	12	120021008139441	1234		Adults >=15	Female	I or II	100-349	598	1.63836		IPT and ART	0	No TB	0			Active	1.63836
Hospital	21	12	120021008140607	1236		Adults >=15	Female	I or II	100-349	598	1.63836		IPT and ART	0	No TB	0			Active	1.63836
Hospital	21	12	120021008136226	1268		Adults >=15	Female	I or II	100-349	611	1.67397		IPT and ART	0	No TB	0			Active	1.67397
Hospital	49	07	7.0049e+13	1292		Adults >=15	Female	I or II	100-349	629	1.72329		IPT and ART	0	No TB	0			Active	1.72329
Hospital	271	07	70271007101676	1314		Adults >=15	Female	I or II	100-349	642	1.7589		IPT and ART	0	No TB	0			Active	1.7589
Hospital	176	07	7.0176e+13	1325		Adults >=15	Female	I or II	100-349	646	1.76986		IPT and ART	0	No TB	0			Active	1.76986
Hospital	59	14	140059007563720	1331		Adults >=15	Female	I or II	100-349	647	1.7726		IPT and ART	0	No TB	0			Active	1.7726
Hospital	49	07	7.0049e+13	1336		Adults >=15	Female	I or II	100-349	649	1.77808		IPT and ART	0	No TB	0			Active	1.77808
Hospital	117	14	140117008145260	1340		Adults >=15	Female	I or II	100-349	651	1.78356		IPT and ART	0	No TB	0			DROP	1.78356
Hospital	115	14	140115008002025	1342		Adults >=15	Female	I or II	100-349	652	1.7863		IPT and ART	0	No TB	0			Active	1.7863
Hospital	271	07	7.0271e+13	1349		Adults >=15	Female	I or II	100-349	655	1.79452		IPT and ART	0	No TB	0			Active	1.79452
Hospital	115	14	140115009133999	1362		Adults >=15	Female	I or II	100-349	660	1.80822		IPT and ART	0	No TB	0			Active	1.80822
Hospital	49	07	7.0049e+13	1368		Adults >=15	Female	I or II	100-349	661	1.81096		IPT and ART	0	No TB	0			TO	1.81096
Hospital	117	14	140117007926603	1386		Adults >=15	Female	I or II	100-349	668	1.83014		IPT and ART	0	No TB	0			TO	1.83014
Hospital	59	14	140059007958227	1399		Adults >=15	Female	I or II	100-349	672	1.8411		IPT and ART	0	No TB	0			TO	1.8411
Hospital	51	07	7.0051e+13	1408		Adults >=15	Female	I or II	100-349	674	1.84658		IPT and ART	0	No TB	0			DROP	1.84658
Hospital	115	14	140115008400659	1412		Adults >=15	Female	I or II	100-349	674	1.84658		IPT and ART	0	No TB	0			Active	1.84658
Hospital	59	14	140059007419980	1428		Adults >=15	Female	I or II	100-349	681	1.86575		IPT and ART	0	No TB	0			Active	1.86575
Hospital	59	14	140059007849714	1446		Adults >=15	Female	I or II	100-349	688	1.88493		IPT and ART	0	No TB	0			DROP	1.88493
Hospital	21	12	120021008101678	1447		Adults >=15	Female	I or II	100-349	689	1.88767		IPT and ART	0	No TB	0			Active	1.88767
Hospital	59	14	140059008463159	1448		Adults >=15	Female	I or II	100-349	689	1.88767		IPT and ART	0	No TB	0			Active	1.88767
Hospital	59	14	140059007906179	1450		Adults >=15	Female	I or II	100-349	690	1.89041		IPT and ART	0	No TB	0			TO	1.89041
Hospital	115	14	140115009308193	1452		Adults >=15	Female	I or II	100-349	691	1.89315		IPT and ART	0	No TB	0			Active	1.89315
Hospital	115	14	140115009376448	1456		Adults >=15	Female	I or II	100-349	692	1.89589		IPT and ART	0	No TB	0			Active	1.89589
Hospital	21	12	120021007646831	1463		Adults >=15	Female	I or II	100-349	695	1.90411		IPT and ART	0	No TB	0			TO	1.90411
Hospital	51	07	7.0051e+13	1467		Adults >=15	Female	I or II	100-349	697	1.90959		IPT and ART	0	No TB	0			Active	1.90959
Hospital	115	14	140115008984318	1484		Adults >=15	Female	I or II	100-349	704	1.92877		IPT and ART	0	No TB	0			Active	1.92877
Hospital	271	07	7.0271e+13	1493		Adults >=15	Female	I or II	100-349	707	1.93699		IPT and ART	0	No TB	0			Active	1.93699
Hospital	115	14	140115009103089	1496		Adults >=15	Female	I or II	100-349	709	1.94247		IPT and ART	0	No TB	0			Active	1.94247
Hospital	21	12	120021008035603	1506		Adults >=15	Female	I or II	100-349	713	1.95342		IPT and ART	0	No TB	0			DROP	1.95342
Hospital	117	14	140117008489205	1510		Adults >=15	Female	I or II	100-349	717	1.96438		IPT and ART	0	No TB	0			Active	1.96438
Hospital	271	07	7.0271e+13	1514		Adults >=15	Female	I or II	100-349	719	1.96986		IPT and ART	0	No TB	0			Active	1.96986
Hospital	117	14	140117008126814	1524		Adults >=15	Female	I or II	100-349	724	1.98356		IPT and ART	0	No TB	0			TO	1.98356
Hospital	21	12	120021006968850	1532		Adults >=15	Female	I or II	100-349	729	1.99726		IPT and ART	0	No TB	0			Active	1.99726
Hospital	115	14	140115008873048	1536		Adults >=15	Female	I or II	100-349	730	2		IPT and ART	0	No TB	0			Active	2
Hospital	59	14	140059008277920	1541		Adults >=15	Female	I or II	100-349	732	2.00548		IPT and ART	0	No TB	0			Active	2.00548
Hospital	21	12	120021008095294	1548		Adults >=15	Female	I or II	100-349	735	2.0137		IPT and ART	0	No TB	0			Active	2.0137
Hospital	51	07	7.0051e+13	1550		Adults >=15	Female	I or II	100-349	735	2.0137		IPT and ART	0	No TB	0			Active	2.0137
Hospital	115	14	140115008377011	1552		Adults >=15	Female	I or II	100-349	736	2.01644		IPT and ART	0	No TB	0			Active	2.01644
Hospital	21	12	120021008078998	1557		Adults >=15	Female	I or II	100-349	740	2.0274		IPT and ART	0	No TB	0			Active	2.0274
Hospital	115	14	140115008344267	1562		Adults >=15	Female	I or II	100-349	742	2.03288		IPT and ART	0	No TB	0			Active	2.03288
Hospital	115	14	140115008930097	1581		Adults >=15	Female	I or II	100-349	748	2.04932		IPT and ART	0	No TB	0			Active	2.04932
Hospital	21	12	120021008060540	1592		Adults >=15	Female	I or II	100-349	751	2.05753		IPT and ART	0	No TB	0			Active	2.05753
Hospital	117	14	140117007748891	1599		Adults >=15	Female	I or II	100-349	755	2.06849		IPT and ART	0	No TB	0			Active	2.06849
Hospital	51	07	7.0051e+13	1601		Adults >=15	Female	I or II	100-349	755	2.06849		IPT and ART	0	No TB	0			TO	2.06849
Hospital	59	14	140059007496652	1615		Adults >=15	Female	I or II	100-349	761	2.08493		IPT and ART	0	No TB	0			Active	2.08493
Hospital	21	12	120021008030735	1624		Adults >=15	Female	I or II	100-349	767	2.10137		IPT and ART	0	No TB	0			Active	2.10137
Hospital	115	14	140115007913887	1625		Adults >=15	Female	I or II	100-349	768	2.10411		IPT and ART	0	No TB	0			Active	2.10411
Hospital	153	07	70153006381816	1626		Adults >=15	Female	I or II	100-349	769	2.10685		IPT and ART	0	No TB	0			TO	2.10685
Hospital	21	12	120021007742402	1633		Adults >=15	Female	I or II	100-349	771	2.11233		IPT and ART	0	No TB	0			TO	2.11233
Hospital	115	14	140115008514389	1637		Adults >=15	Female	I or II	100-349	773	2.11781		IPT and ART	0	No TB	0			Active	2.11781
Hospital	21	12	120021008023552	1657		Adults >=15	Female	I or II	100-349	782	2.14247		IPT and ART	0	No TB	0			TO	2.14247
Hospital	59	14	140059007578145	1658		Adults >=15	Female	I or II	100-349	783	2.14521		IPT and ART	0	No TB	0			Active	2.14521
Hospital	51	07	7.0051e+13	1659		Adults >=15	Female	I or II	100-349	784	2.14795		IPT and ART	0	No TB	0			Active	2.14795
Hospital	49	07	7.0049e+13	1660		Adults >=15	Female	I or II	100-349	784	2.14795		IPT and ART	0	No TB	0			DROP	2.14795
Hospital	21	12	120021008039157	1667		Adults >=15	Female	I or II	100-349	789	2.16164		IPT and ART	0	No TB	0			Active	2.16164
Hospital	21	12	120021008039802	1670		Adults >=15	Female	I or II	100-349	790	2.16438		IPT and ART	0	No TB	0			Active	2.16438
Hospital	59	14	140059007342132	1671		Adults >=15	Female	I or II	100-349	791	2.16712		IPT and ART	0	No TB	0			Active	2.16712
Hospital	117	14	140117007982075	1676		Adults >=15	Female	I or II	100-349	792	2.16986		IPT and ART	0	No TB	0			Active	2.16986
Hospital	117	14	140117006447306	1677		Adults >=15	Female	I or II	100-349	792	2.16986		IPT and ART	0	No TB	0			Active	2.16986
Hospital	21	12	120021007908755	1681		Adults >=15	Female	I or II	100-349	796	2.18082		IPT and ART	0	No TB	0			DROP	2.18082
Hospital	271	07	70271005062595	1690		Adults >=15	Female	I or II	100-349	801	2.19452		IPT and ART	0	No TB	0			Active	2.19452
Hospital	21	12	120021008036897	1693		Adults >=15	Female	I or II	100-349	802	2.19726		IPT and ART	0	No TB	0			Active	2.19726
Hospital	47	07	7.0047e+13	1695		Adults >=15	Female	I or II	100-349	802	2.19726		IPT and ART	0	No TB	0			DROP	2.19726
Hospital	21	12	120021007822445	1696		Adults >=15	Female	I or II	100-349	803	2.2		IPT and ART	0	No TB	0			TO	2.2
Hospital	115	14	140115009384798	1700		Adults >=15	Female	I or II	100-349	804	2.20274		IPT and ART	0	No TB	0			Active	2.20274
Hospital	21	12	120021008045909	1705		Adults >=15	Female	I or II	100-349	805	2.20548		IPT and ART	0	No TB	0			Active	2.20548
Hospital	117	14	140117008305978	1708		Adults >=15	Female	I or II	100-349	807	2.21096		IPT and ART	0	No TB	0			Active	2.21096
Hospital	176	07	7.0176e+13	1710		Adults >=15	Female	I or II	100-349	808	2.2137		IPT and ART	0	No TB	0			Active	2.2137
Hospital	153	07	7.0153e+13	1715		Adults >=15	Female	I or II	100-349	811	2.22192		IPT and ART	0	No TB	0			Active	2.22192
Hospital	117	14	140117006855409	1716		Adults >=15	Female	I or II	100-349	811	2.22192		IPT and ART	0	No TB	0			TO	2.22192
Hospital	271	07	7.0271e+13	1718		Adults >=15	Female	I or II	100-349	813	2.2274		IPT and ART	0	No TB	0			Active	2.2274
Hospital	153	07	7.0153e+13	1726		Adults >=15	Female	I or II	100-349	818	2.2411		IPT and ART	0	No TB	0			Active	2.2411
Hospital	115	14	140115009233666	1737		Adults >=15	Female	I or II	100-349	822	2.25205		IPT and ART	0	No TB	0			Active	2.25205
Hospital	176	07	7.0176e+13	1745		Adults >=15	Female	I or II	100-349	825	2.26027		IPT and ART	0	No TB	0			DROP	2.26027
Hospital	21	12	120021008038512	1747		Adults >=15	Female	I or II	100-349	825	2.26027		IPT and ART	0	No TB	0			Active	2.26027
Hospital	49	07	7.0049e+13	1763		Adults >=15	Female	I or II	100-349	836	2.29041		IPT and ART	0	No TB	0			TO	2.29041
Hospital	115	14	140115009310729	1765		Adults >=15	Female	I or II	100-349	838	2.29589		IPT and ART	0	No TB	0			Active	2.29589
Hospital	59	14	140059005192957	1783		Adults >=15	Female	I or II	100-349	845	2.31507		IPT and ART	0	No TB	0			DEAD	2.31507
Hospital	59	14	140059008136518	1785		Adults >=15	Female	I or II	100-349	846	2.31781		IPT and ART	0	No TB	0			TO	2.31781
Hospital	51	07	7.0051e+13	1789		Adults >=15	Female	I or II	100-349	850	2.32877		IPT and ART	0	No TB	0			Active	2.32877
Hospital	115	14	140115006549651	1796		Adults >=15	Female	I or II	100-349	855	2.34247		IPT and ART	0	No TB	0			Active	2.34247
Hospital	21	12	120021007905442	1806		Adults >=15	Female	I or II	100-349	860	2.35616		IPT and ART	0	No TB	0			TO	2.35616
Hospital	153	07	7.0153e+13	1808		Adults >=15	Female	I or II	100-349	861	2.3589		IPT and ART	0	No TB	0			Active	2.3589
Hospital	153	07	7.0153e+13	1809		Adults >=15	Female	I or II	100-349	861	2.3589		IPT and ART	0	No TB	0			Active	2.3589
Hospital	21	12	120021007975908	1812		Adults >=15	Female	I or II	100-349	862	2.36164		IPT and ART	0	No TB	0			Active	2.36164
Hospital	110	07	7.011e+13	1814		Adults >=15	Female	I or II	100-349	863	2.36438		IPT and ART	0	No TB	0			Active	2.36438
Hospital	271	07	7.0271e+13	1817		Adults >=15	Female	I or II	100-349	865	2.36986		IPT and ART	0	No TB	0			Active	2.36986
Hospital	47	07	7.0047e+13	1821		Adults >=15	Female	I or II	100-349	867	2.37534		IPT and ART	0	No TB	0			Active	2.37534
Hospital	47	07	70047007597898	1839		Adults >=15	Female	I or II	100-349	879	2.40822		IPT and ART	0	No TB	0			Active	2.40822
Hospital	110	07	7.011e+13	1845		Adults >=15	Female	I or II	100-349	882	2.41644		IPT and ART	0	No TB	0			LOST	2.41644
Hospital	59	14	140059011451805	1846		Adults >=15	Female	I or II	100-349	883	2.41918		IPT and ART	0	No TB	0			Active	2.41918
Hospital	117	14	140117008397508	1850		Adults >=15	Female	I or II	100-349	884	2.42192		IPT and ART	0	No TB	0			Active	2.42192
Hospital	49	07	7.0049e+13	1863		Adults >=15	Female	I or II	100-349	890	2.43836		IPT and ART	0	No TB	0			Active	2.43836
Hospital	271	07	70271006369901	1865		Adults >=15	Female	I or II	100-349	893	2.44658		IPT and ART	0	No TB	0			Active	2.44658
Hospital	59	14	140059007580189	1867		Adults >=15	Female	I or II	100-349	893	2.44658		IPT and ART	0	No TB	0			Active	2.44658
Hospital	47	07	7.0047e+13	1870		Adults >=15	Female	I or II	100-349	895	2.45205		IPT and ART	0	No TB	0			Active	2.45205
Hospital	115	14	140115009342333	1873		Adults >=15	Female	I or II	100-349	895	2.45205		IPT and ART	0	No TB	0			Active	2.45205
Hospital	153	07	70153006413459	1879		Adults >=15	Female	I or II	100-349	899	2.46301		IPT and ART	0	No TB	0			Active	2.46301
Hospital	176	07	7.0176e+13	1896		Adults >=15	Female	I or II	100-349	910	2.49315		IPT and ART	0	No TB	0			Active	2.49315
Hospital	47	07	7.0047e+13	1904		Adults >=15	Female	I or II	100-349	915	2.50685		IPT and ART	0	No TB	0			Active	2.50685
Hospital	21	12	120021008010028	1908		Adults >=15	Female	I or II	100-349	917	2.51233		IPT and ART	0	No TB	0			Active	2.51233
Hospital	47	07	7.0047e+13	1910		Adults >=15	Female	I or II	100-349	918	2.51507		IPT and ART	0	No TB	0			Active	2.51507
Hospital	51	07	70051006658011	1915		Adults >=15	Female	I or II	100-349	921	2.52329		IPT and ART	0	No TB	0			TO	2.52329
Hospital	271	07	70271006735780	1917		Adults >=15	Female	I or II	100-349	922	2.52603		IPT and ART	0	No TB	0			Active	2.52603
Hospital	47	07	7.0047e+13	1919		Adults >=15	Female	I or II	100-349	923	2.52877		IPT and ART	0	No TB	0			TO	2.52877
Hospital	47	07	7.0047e+13	1920		Adults >=15	Female	I or II	100-349	923	2.52877		IPT and ART	0	No TB	0			TO	2.52877
Hospital	47	07	70047008413387	1924		Adults >=15	Female	I or II	100-349	924	2.53151		IPT and ART	0	No TB	0			Active	2.53151
Hospital	49	07	7.0049e+13	1927		Adults >=15	Female	I or II	100-349	925	2.53425		IPT and ART	0	No TB	0			Active	2.53425
Hospital	153	07	7.0153e+13	1936		Adults >=15	Female	I or II	100-349	930	2.54795		IPT and ART	0	No TB	0			Active	2.54795
Hospital	21	12	120021006519147	1939		Adults >=15	Female	I or II	100-349	932	2.55342		IPT and ART	0	No TB	0			Active	2.55342
Hospital	21	12	120021007922624	1942		Adults >=15	Female	I or II	100-349	933	2.55616		IPT and ART	0	No TB	0			Active	2.55616
Hospital	51	07	7.0051e+13	1963		Adults >=15	Female	I or II	100-349	944	2.5863		IPT and ART	0	No TB	0			Active	2.5863
Hospital	49	07	7.0049e+13	1969		Adults >=15	Female	I or II	100-349	945	2.58904		IPT and ART	0	No TB	0			TO	2.58904
Hospital	117	14	140117008170469	1975		Adults >=15	Female	I or II	100-349	948	2.59726		IPT and ART	0	No TB	0			TO	2.59726
Hospital	21	12	120021007991592	1984		Adults >=15	Female	I or II	100-349	952	2.60822		IPT and ART	0	No TB	0			Active	2.60822
Hospital	176	07	7.0176e+13	1986		Adults >=15	Female	I or II	100-349	952	2.60822		IPT and ART	0	No TB	0			Active	2.60822
Hospital	47	07	7.0047e+13	1991		Adults >=15	Female	I or II	100-349	954	2.6137		IPT and ART	0	No TB	0			Active	2.6137
Hospital	49	07	7.0049e+13	1994		Adults >=15	Female	I or II	100-349	954	2.6137		IPT and ART	0	No TB	0			Active	2.6137
Hospital	117	14	140117007970049	2009		Adults >=15	Female	I or II	100-349	961	2.63288		IPT and ART	0	No TB	0			Active	2.63288
Hospital	51	07	7.0051e+13	2010		Adults >=15	Female	I or II	100-349	961	2.63288		IPT and ART	0	No TB	0			TO	2.63288
Hospital	110	07	7.011e+13	2012		Adults >=15	Female	I or II	100-349	961	2.63288		IPT and ART	0	No TB	0			Active	2.63288
Hospital	49	07	7.0049e+13	2021		Adults >=15	Female	I or II	100-349	966	2.64658		IPT and ART	0	No TB	0			Active	2.64658
Hospital	21	12	120021007987864	2026		Adults >=15	Female	I or II	100-349	967	2.64932		IPT and ART	0	No TB	0			Active	2.64932
Hospital	110	07	7.011e+13	2032		Adults >=15	Female	I or II	100-349	969	2.65479		IPT and ART	0	No TB	0			Active	2.65479
Hospital	51	07	7.0051e+13	2035		Adults >=15	Female	I or II	100-349	972	2.66301		IPT and ART	0	No TB	0			Active	2.66301
Hospital	51	07	7.0051e+13	2038		Adults >=15	Female	I or II	100-349	973	2.66575		IPT and ART	0	No TB	0			Active	2.66575
Hospital	49	07	7.0049e+13	2041		Adults >=15	Female	I or II	100-349	975	2.67123		IPT and ART	0	No TB	0			Active	2.67123
Hospital	49	07	7.0049e+13	2055		Adults >=15	Female	I or II	100-349	981	2.68767		IPT and ART	0	No TB	0			Active	2.68767
Hospital	47	07	7.0047e+13	2056		Adults >=15	Female	I or II	100-349	981	2.68767		IPT and ART	0	No TB	0			Active	2.68767
Hospital	59	14	140059008304000	2059		Adults >=15	Female	I or II	100-349	984	2.69589		IPT and ART	0	No TB	0			Active	2.69589
Hospital	153	07	7.0153e+13	2067		Adults >=15	Female	I or II	100-349	987	2.70411		IPT and ART	0	No TB	0			Active	2.70411
Hospital	176	07	7.0176e+13	2068		Adults >=15	Female	I or II	100-349	987	2.70411		IPT and ART	0	No TB	0			Active	2.70411
Hospital	51	07	7.0051e+13	2069		Adults >=15	Female	I or II	100-349	987	2.70411		IPT and ART	0	No TB	0			Active	2.70411
Hospital	153	07	7.0153e+13	2074		Adults >=15	Female	I or II	100-349	989	2.70959		IPT and ART	0	No TB	0			Active	2.70959
Hospital	115	14	140115008317766	2089		Adults >=15	Female	I or II	100-349	994	2.72329		IPT and ART	0	No TB	0			Active	2.72329
Hospital	51	07	7.0051e+13	2094		Adults >=15	Female	I or II	100-349	996	2.72877		IPT and ART	0	No TB	0			Active	2.72877
Hospital	21	12	120021004143135	2103		Adults >=15	Female	I or II	100-349	999	2.73699		IPT and ART	0	No TB	0			TO	2.73699
Hospital	117	14	140117008261526	2106		Adults >=15	Female	I or II	100-349	1000	2.73973		IPT and ART	0	No TB	0			Active	2.73973
Hospital	176	07	7.0176e+13	2110		Adults >=15	Female	I or II	100-349	1003	2.74795		IPT and ART	0	No TB	0			Active	2.74795
Hospital	21	12	120021007943783	2115		Adults >=15	Female	I or II	100-349	1009	2.76438		IPT and ART	0	No TB	0			Active	2.76438
Hospital	117	14	140117007085901	2121		Adults >=15	Female	I or II	100-349	1011	2.76986		IPT and ART	0	No TB	0			Active	2.76986
Hospital	59	14	140059007134891	2122		Adults >=15	Female	I or II	100-349	1011	2.76986		IPT and ART	0	No TB	0			Active	2.76986
Hospital	115	14	140115009295141	2133		Adults >=15	Female	I or II	100-349	1013	2.77534		IPT and ART	0	No TB	0			Active	2.77534
Hospital	59	14	140059007563201	2135		Adults >=15	Female	I or II	100-349	1014	2.77808		IPT and ART	0	No TB	0			Active	2.77808
Hospital	51	07	7.0051e+13	2141		Adults >=15	Female	I or II	100-349	1016	2.78356		IPT and ART	0	No TB	0			TO	2.78356
Hospital	110	07	7.011e+13	2143		Adults >=15	Female	I or II	100-349	1016	2.78356		IPT and ART	0	No TB	0			Active	2.78356
Hospital	21	12	120021007950150	2165		Adults >=15	Female	I or II	100-349	1023	2.80274		IPT and ART	0	No TB	0			Active	2.80274
Hospital	49	07	70049005164786	2178		Adults >=15	Female	I or II	100-349	1026	2.81096		IPT and ART	0	No TB	0			Active	2.81096
Hospital	47	07	7.0047e+13	2181		Adults >=15	Female	I or II	100-349	1026	2.81096		IPT and ART	0	No TB	0			Active	2.81096
Hospital	115	14	140115008752423	2182		Adults >=15	Female	I or II	100-349	1027	2.8137		IPT and ART	0	No TB	0			LOST	2.8137
Hospital	59	14	140059006956545	2188		Adults >=15	Female	I or II	100-349	1030	2.82192		IPT and ART	0	No TB	0			Active	2.82192
Hospital	117	14	140117008310169	2201		Adults >=15	Female	I or II	100-349	1033	2.83014		IPT and ART	0	No TB	0			Active	2.83014
Hospital	115	14	140115008473032	2202		Adults >=15	Female	I or II	100-349	1034	2.83288		IPT and ART	0	No TB	0			Active	2.83288
Hospital	153	07	7.0153e+13	2207		Adults >=15	Female	I or II	100-349	1036	2.83836		IPT and ART	0	No TB	0			Active	2.83836
Hospital	49	07	7.0049e+13	2218		Adults >=15	Female	I or II	100-349	1042	2.85479		IPT and ART	0	No TB	0			Active	2.85479
Hospital	59	14	140059007792762	2220		Adults >=15	Female	I or II	100-349	1042	2.85479		IPT and ART	0	No TB	0			DROP	2.85479
Hospital	47	07	7.0047e+13	2221		Adults >=15	Female	I or II	100-349	1044	2.86027		IPT and ART	0	No TB	0			Active	2.86027
Hospital	117	14	140117007544332	2224		Adults >=15	Female	I or II	100-349	1045	2.86301		IPT and ART	0	No TB	0			Active	2.86301
Hospital	47	07	7.0047e+13	2232		Adults >=15	Female	I or II	100-349	1046	2.86575		IPT and ART	0	No TB	0			Active	2.86575
Hospital	47	07	7.0047e+13	2235		Adults >=15	Female	I or II	100-349	1047	2.86849		IPT and ART	0	No TB	0			Active	2.86849
Hospital	176	07	7.0176e+13	2236		Adults >=15	Female	I or II	100-349	1047	2.86849		IPT and ART	0	No TB	0			Active	2.86849
Hospital	21	12	120021007924072	2237		Adults >=15	Female	I or II	100-349	1050	2.87671		IPT and ART	0	No TB	0			Active	2.87671
Hospital	51	07	7.0051e+13	2244		Adults >=15	Female	I or II	100-349	1052	2.88219		IPT and ART	0	No TB	0			Active	2.88219
Hospital	115	14	140115009117128	2245		Adults >=15	Female	I or II	100-349	1053	2.88493		IPT and ART	0	No TB	0			Active	2.88493
Hospital	49	07	7.0049e+13	2246		Adults >=15	Female	I or II	100-349	1053	2.88493		IPT and ART	0	No TB	0			Active	2.88493
Hospital	51	07	7.0051e+13	2251		Adults >=15	Female	I or II	100-349	1054	2.88767		IPT and ART	0	No TB	0			Active	2.88767
Hospital	21	12	120021007822845	2256		Adults >=15	Female	I or II	100-349	1056	2.89315		IPT and ART	0	No TB	0			Active	2.89315
Hospital	21	12	120021007781973	2260		Adults >=15	Female	I or II	100-349	1057	2.89589		IPT and ART	0	No TB	0			DEAD	2.89589
Hospital	49	07	7.0049e+13	2261		Adults >=15	Female	I or II	100-349	1057	2.89589		IPT and ART	0	No TB	0			Active	2.89589
Hospital	115	14	140115008443331	2267		Adults >=15	Female	I or II	100-349	1058	2.89863		IPT and ART	0	No TB	0			Active	2.89863
Hospital	59	14	140059007905073	2271		Adults >=15	Female	I or II	100-349	1059	2.90137		IPT and ART	0	No TB	0			Active	2.90137
Hospital	59	14	140059008162801	2279		Adults >=15	Female	I or II	100-349	1063	2.91233		IPT and ART	0	No TB	0			Active	2.91233
Hospital	21	12	120021007697575	2281		Adults >=15	Female	I or II	100-349	1063	2.91233		IPT and ART	0	No TB	0			DROP	2.91233
Hospital	51	07	7.0051e+13	2287		Adults >=15	Female	I or II	100-349	1064	2.91507		IPT and ART	0	No TB	0			Active	2.91507
Hospital	59	14	140059007567346	2293		Adults >=15	Female	I or II	100-349	1066	2.92055		IPT and ART	0	No TB	0			Active	2.92055
Hospital	59	14	140059008138857	2298		Adults >=15	Female	I or II	100-349	1067	2.92329		IPT and ART	0	No TB	0			Active	2.92329
Hospital	21	12	120021007935230	2300		Adults >=15	Female	I or II	100-349	1068	2.92603		IPT and ART	0	No TB	0			Active	2.92603
Hospital	59	14	140059007461640	2304		Adults >=15	Female	I or II	100-349	1069	2.92877		IPT and ART	0	No TB	0			Active	2.92877
Hospital	59	14	140059008464847	2306		Adults >=15	Female	I or II	100-349	1070	2.93151		IPT and ART	0	No TB	0			Active	2.93151
Hospital	21	12	120021007920810	2308		Adults >=15	Female	I or II	100-349	1070	2.93151		IPT and ART	0	No TB	0			Active	2.93151
Hospital	110	07	7.011e+13	2310		Adults >=15	Female	I or II	100-349	1071	2.93425		IPT and ART	0	No TB	0			Active	2.93425
Hospital	21	12	120021007897668	2316		Adults >=15	Female	I or II	100-349	1073	2.93973		IPT and ART	0	No TB	0			Active	2.93973
Hospital	49	07	70049007530480	2318		Adults >=15	Female	I or II	100-349	1074	2.94247		IPT and ART	0	No TB	0			Active	2.94247
Hospital	51	07	7.0051e+13	2326		Adults >=15	Female	I or II	100-349	1077	2.95068		IPT and ART	0	No TB	0			Active	2.95068
Hospital	59	14	140059007514255	2329		Adults >=15	Female	I or II	100-349	1079	2.95616		IPT and ART	0	No TB	0			Active	2.95616
Hospital	59	14	140059006904751	2331		Adults >=15	Female	I or II	100-349	1080	2.9589		IPT and ART	0	No TB	0			Active	2.9589
Hospital	115	14	140115008091933	2341		Adults >=15	Female	I or II	100-349	1082	2.96438		IPT and ART	0	No TB	0			Active	2.96438
Hospital	59	14	140059007757906	2342		Adults >=15	Female	I or II	100-349	1082	2.96438		IPT and ART	0	No TB	0			Active	2.96438
Hospital	115	14	140115009180087	2344		Adults >=15	Female	I or II	100-349	1082	2.96438		IPT and ART	0	No TB	0			Active	2.96438
Hospital	59	14	140059006862758	2346		Adults >=15	Female	I or II	100-349	1083	2.96712		IPT and ART	0	No TB	0			Active	2.96712
Hospital	47	07	7.0047e+13	2347		Adults >=15	Female	I or II	100-349	1083	2.96712		IPT and ART	0	No TB	0			Active	2.96712
Hospital	21	12	120021007928406	2348		Adults >=15	Female	I or II	100-349	1083	2.96712		IPT and ART	0	No TB	0			Active	2.96712
Hospital	21	12	120021007925158	2350		Adults >=15	Female	I or II	100-349	1084	2.96986		IPT and ART	0	No TB	0			Active	2.96986
Hospital	271	07	7.0271e+13	2354		Adults >=15	Female	I or II	100-349	1085	2.9726		IPT and ART	0	No TB	0			DROP	2.9726
Hospital	59	14	140059007759187	2357		Adults >=15	Female	I or II	100-349	1086	2.97534		IPT and ART	0	No TB	0			Active	2.97534
Hospital	21	12	120021007168580	2362		Adults >=15	Female	I or II	100-349	1087	2.97808		IPT and ART	0	No TB	0			TO	2.97808
Hospital	59	14	140059007892078	2367		Adults >=15	Female	I or II	100-349	1090	2.9863		IPT and ART	0	No TB	0			Active	2.9863
Hospital	117	14	140117008040125	2368		Adults >=15	Female	I or II	100-349	1091	2.98904		IPT and ART	0	No TB	0			Active	2.98904
Hospital	59	14	140059007074117	2369		Adults >=15	Female	I or II	100-349	1091	2.98904		IPT and ART	0	No TB	0			Active	2.98904
Hospital	51	07	7.0051e+13	2371		Adults >=15	Female	I or II	100-349	1092	2.99178		IPT and ART	0	No TB	0			Active	2.99178
Hospital	51	07	7.0051e+13	2378		Adults >=15	Female	I or II	100-349	1093	2.99452		IPT and ART	0	No TB	0			Active	2.99452
Hospital	21	12	120021007890957	2396		Adults >=15	Female	I or II	100-349	1102	3.01918		IPT and ART	0	No TB	0			Active	3.01918
Hospital	21	12	120021007887959	2405		Adults >=15	Female	I or II	100-349	1105	3.0274		IPT and ART	0	No TB	0			Active	3.0274
Hospital	115	14	140115006639876	2408		Adults >=15	Female	I or II	100-349	1105	3.0274		IPT and ART	0	No TB	0			TO	3.0274
Hospital	51	07	7.0051e+13	2416		Adults >=15	Female	I or II	100-349	1107	3.03288		IPT and ART	0	No TB	0			TO	3.03288
Hospital	59	14	140059008065579	2418		Adults >=15	Female	I or II	100-349	1108	3.03562		IPT and ART	0	No TB	0			DROP	3.03562
Hospital	21	12	120021007897296	2424		Adults >=15	Female	I or II	100-349	1111	3.04384		IPT and ART	0	No TB	0			Active	3.04384
Hospital	59	14	140059007594884	2426		Adults >=15	Female	I or II	100-349	1112	3.04658		IPT and ART	0	No TB	0			Active	3.04658
Hospital	21	12	120021007913521	2431		Adults >=15	Female	I or II	100-349	1114	3.05205		IPT and ART	0	No TB	0			Active	3.05205
Hospital	110	07	7.011e+13	2433		Adults >=15	Female	I or II	100-349	1114	3.05205		IPT and ART	0	No TB	0			Active	3.05205
Hospital	51	07	7.0051e+13	2437		Adults >=15	Female	I or II	100-349	1116	3.05753		IPT and ART	0	No TB	0			Active	3.05753
Hospital	115	14	140115009309099	2455		Adults >=15	Female	I or II	100-349	1125	3.08219		IPT and ART	0	No TB	0			Active	3.08219
Hospital	21	12	120021007883069	2461		Adults >=15	Female	I or II	100-349	1127	3.08767		IPT and ART	0	No TB	0			Active	3.08767
Hospital	115	14	140115008531885	2471		Adults >=15	Female	I or II	100-349	1130	3.09589		IPT and ART	0	No TB	0			Active	3.09589
Hospital	21	12	120021007883823	2472		Adults >=15	Female	I or II	100-349	1130	3.09589		IPT and ART	0	No TB	0			Active	3.09589
Hospital	153	07	7.0153e+13	2478		Adults >=15	Female	I or II	100-349	1133	3.10411		IPT and ART	0	No TB	0			Active	3.10411
Hospital	117	14	140117008315077	2482		Adults >=15	Female	I or II	100-349	1135	3.10959		IPT and ART	0	No TB	0			Active	3.10959
Hospital	21	12	120021007893945	2484		Adults >=15	Female	I or II	100-349	1135	3.10959		IPT and ART	0	No TB	0			Active	3.10959
Hospital	59	14	140059008015988	2486		Adults >=15	Female	I or II	100-349	1136	3.11233		IPT and ART	0	No TB	0			Active	3.11233
Hospital	51	07	7.0051e+13	2493		Adults >=15	Female	I or II	100-349	1138	3.11781		IPT and ART	0	No TB	0			Active	3.11781
Hospital	21	12	120021007941296	2497		Adults >=15	Female	I or II	100-349	1139	3.12055		IPT and ART	0	No TB	0			Active	3.12055
Hospital	110	07	7.011e+13	2503		Adults >=15	Female	I or II	100-349	1141	3.12603		IPT and ART	0	No TB	0			Active	3.12603
Hospital	153	07	7.0153e+13	2504		Adults >=15	Female	I or II	100-349	1141	3.12603		IPT and ART	0	No TB	0			Active	3.12603
Hospital	21	12	120021007913887	2509		Adults >=15	Female	I or II	100-349	1142	3.12877		IPT and ART	0	No TB	0			Active	3.12877
Hospital	21	12	120021007894691	2511		Adults >=15	Female	I or II	100-349	1143	3.13151		IPT and ART	0	No TB	0			Active	3.13151
Hospital	21	12	120021006654153	2513		Adults >=15	Female	I or II	100-349	1143	3.13151		IPT and ART	0	No TB	0			DROP	3.13151
Hospital	59	14	140059007224025	2531		Adults >=15	Female	I or II	100-349	1151	3.15342		IPT and ART	0	No TB	0			TO	3.15342
Hospital	59	14	140059007293018	2532		Adults >=15	Female	I or II	100-349	1151	3.15342		IPT and ART	0	No TB	0			Active	3.15342
Hospital	153	07	7.0153e+13	2535		Adults >=15	Female	I or II	100-349	1153	3.1589		IPT and ART	0	No TB	0			Active	3.1589
Hospital	153	07	7.0153e+13	2541		Adults >=15	Female	I or II	100-349	1155	3.16438		IPT and ART	0	No TB	0			Active	3.16438
Hospital	49	07	7.0049e+13	2549		Adults >=15	Female	I or II	100-349	1157	3.16986		IPT and ART	0	No TB	0			Active	3.16986
Hospital	47	07	7.0047e+13	2560		Adults >=15	Female	I or II	100-349	1160	3.17808		IPT and ART	0	No TB	0			TO	3.17808
Hospital	49	07	7.0049e+13	2565		Adults >=15	Female	I or II	100-349	1161	3.18082		IPT and ART	0	No TB	0			Active	3.18082
Hospital	21	12	120021007855545	2570		Adults >=15	Female	I or II	100-349	1163	3.1863		IPT and ART	0	No TB	0			Active	3.1863
Hospital	21	12	120021007980024	2572		Adults >=15	Female	I or II	100-349	1164	3.18904		IPT and ART	0	No TB	0			Active	3.18904
Hospital	49	07	7.0049e+13	2574		Adults >=15	Female	I or II	100-349	1164	3.18904		IPT and ART	0	No TB	0			Active	3.18904
Hospital	21	12	120021006781058	2578		Adults >=15	Female	I or II	100-349	1167	3.19726		IPT and ART	0	No TB	0			Active	3.19726
Hospital	21	12	120021007812783	2582		Adults >=15	Female	I or II	100-349	1168	3.2		IPT and ART	0	No TB	0			Active	3.2
Hospital	153	07	7.0153e+13	2583		Adults >=15	Female	I or II	100-349	1168	3.2		IPT and ART	0	No TB	0			Active	3.2
Hospital	115	14	140115006908755	2586		Adults >=15	Female	I or II	100-349	1168	3.2		IPT and ART	0	No TB	0			Active	3.2
Hospital	59	14	140059007706163	2592		Adults >=15	Female	I or II	100-349	1171	3.20822		IPT and ART	0	No TB	0			Active	3.20822
Hospital	21	12	120021007844633	2596		Adults >=15	Female	I or II	100-349	1172	3.21096		IPT and ART	0	No TB	0			Active	3.21096
Hospital	59	14	140059006988413	2601		Adults >=15	Female	I or II	100-349	1175	3.21918		IPT and ART	0	No TB	0			Active	3.21918
Hospital	49	07	7.0049e+13	2606		Adults >=15	Female	I or II	100-349	1176	3.22192		IPT and ART	0	No TB	0			Active	3.22192
Hospital	110	07	7.011e+13	2613		Adults >=15	Female	I or II	100-349	1178	3.2274		IPT and ART	0	No TB	0			Active	3.2274
Hospital	59	14	140059006910751	2619		Adults >=15	Female	I or II	100-349	1180	3.23288		IPT and ART	0	No TB	0			Active	3.23288
Hospital	153	07	7.0153e+13	2621		Adults >=15	Female	I or II	100-349	1180	3.23288		IPT and ART	0	No TB	0			Active	3.23288
Hospital	176	07	7.0176e+13	2622		Adults >=15	Female	I or II	100-349	1181	3.23562		IPT and ART	0	No TB	0			Active	3.23562
Hospital	115	14	140115009270588	2624		Adults >=15	Female	I or II	100-349	1182	3.23836		IPT and ART	0	No TB	0			Active	3.23836
Hospital	49	07	7.0049e+13	2627		Adults >=15	Female	I or II	100-349	1182	3.23836		IPT and ART	0	No TB	0			DROP	3.23836
Hospital	59	14	140059007946264	2631		Adults >=15	Female	I or II	100-349	1183	3.2411		IPT and ART	0	No TB	0			Active	3.2411
Hospital	21	12	120021007800573	2633		Adults >=15	Female	I or II	100-349	1184	3.24384		IPT and ART	0	No TB	0			Active	3.24384
Hospital	117	14	140117008195610	2645		Adults >=15	Female	I or II	100-349	1188	3.25479		IPT and ART	0	No TB	0			Active	3.25479
Hospital	49	07	7.0049e+13	2646		Adults >=15	Female	I or II	100-349	1188	3.25479		IPT and ART	0	No TB	0			Active	3.25479
Hospital	49	07	7.0049e+13	2650		Adults >=15	Female	I or II	100-349	1191	3.26301		IPT and ART	0	No TB	0			Active	3.26301
Hospital	115	14	140115009244838	2654		Adults >=15	Female	I or II	100-349	1192	3.26575		IPT and ART	0	No TB	0			Active	3.26575
Hospital	49	07	7.0049e+13	2655		Adults >=15	Female	I or II	100-349	1192	3.26575		IPT and ART	0	No TB	0			Active	3.26575
Hospital	59	14	140059007894691	2657		Adults >=15	Female	I or II	100-349	1194	3.27123		IPT and ART	0	No TB	0			Active	3.27123
Hospital	49	07	7.0049e+13	2661		Adults >=15	Female	I or II	100-349	1196	3.27671		IPT and ART	0	No TB	0			Active	3.27671
Hospital	49	07	70049006025866	2664		Adults >=15	Female	I or II	100-349	1197	3.27945		IPT and ART	0	No TB	0			Active	3.27945
Hospital	59	14	140059006915723	2673		Adults >=15	Female	I or II	100-349	1200	3.28767		IPT and ART	0	No TB	0			Active	3.28767
Hospital	59	14	140059007136483	2677		Adults >=15	Female	I or II	100-349	1202	3.29315		IPT and ART	0	No TB	0			LOST	3.29315
Hospital	117	14	140117008283494	2679		Adults >=15	Female	I or II	100-349	1203	3.29589		IPT and ART	0	No TB	0			TO	3.29589
Hospital	153	07	7.0153e+13	2680		Adults >=15	Female	I or II	100-349	1203	3.29589		IPT and ART	0	No TB	0			Active	3.29589
Hospital	21	12	120021007452402	2684		Adults >=15	Female	I or II	100-349	1204	3.29863		IPT and ART	0	No TB	0			DROP	3.29863
Hospital	49	07	7.0049e+13	2687		Adults >=15	Female	I or II	100-349	1205	3.30137		IPT and ART	0	No TB	0			Active	3.30137
Hospital	49	07	7.0049e+13	2690		Adults >=15	Female	I or II	100-349	1206	3.30411		IPT and ART	0	No TB	0			Active	3.30411
Hospital	21	12	120021007829233	2695		Adults >=15	Female	I or II	100-349	1207	3.30685		IPT and ART	0	No TB	0			Active	3.30685
Hospital	59	14	140059007970740	2720		Adults >=15	Female	I or II	100-349	1221	3.34521		IPT and ART	0	No TB	0			Active	3.34521
Hospital	49	07	7.0049e+13	2723		Adults >=15	Female	I or II	100-349	1224	3.35342		IPT and ART	0	No TB	0			Active	3.35342
Hospital	59	14	140059006995766	2727		Adults >=15	Female	I or II	100-349	1226	3.3589		IPT and ART	0	No TB	0			Active	3.3589
Hospital	49	07	7.0049e+13	2728		Adults >=15	Female	I or II	100-349	1226	3.3589		IPT and ART	0	No TB	0			Active	3.3589
Hospital	21	12	120021007820841	2731		Adults >=15	Female	I or II	100-349	1226	3.3589		IPT and ART	0	No TB	0			LOST	3.3589
Hospital	115	14	140115009268798	2739		Adults >=15	Female	I or II	100-349	1228	3.36438		IPT and ART	0	No TB	0			Active	3.36438
Hospital	115	14	140115008921458	2747		Adults >=15	Female	I or II	100-349	1231	3.3726		IPT and ART	0	No TB	0			Active	3.3726
Hospital	21	12	120021007837949	2758		Adults >=15	Female	I or II	100-349	1235	3.38356		IPT and ART	0	No TB	0			Active	3.38356
Hospital	21	12	120021007730175	2768		Adults >=15	Female	I or II	100-349	1237	3.38904		IPT and ART	0	No TB	0			Active	3.38904
Hospital	59	14	140059008099554	2769		Adults >=15	Female	I or II	100-349	1237	3.38904		IPT and ART	0	No TB	0			Active	3.38904
Hospital	59	14	140059007926964	2786		Adults >=15	Female	I or II	100-349	1241	3.4		IPT and ART	0	No TB	0			Active	3.4
Hospital	59	14	140059006343880	2792		Adults >=15	Female	I or II	100-349	1242	3.40274		IPT and ART	0	No TB	0			Active	3.40274
Hospital	115	14	140115006901737	2805		Adults >=15	Female	I or II	100-349	1247	3.41644		IPT and ART	0	No TB	0			Active	3.41644
Hospital	49	07	7.0049e+13	2815		Adults >=15	Female	I or II	100-349	1251	3.4274		IPT and ART	0	No TB	0			TO	3.4274
Hospital	59	14	140059008016648	2818		Adults >=15	Female	I or II	100-349	1251	3.4274		IPT and ART	0	No TB	0			Active	3.4274
Hospital	115	14	140115009279960	2829		Adults >=15	Female	I or II	100-349	1253	3.43288		IPT and ART	0	No TB	0			Active	3.43288
Hospital	117	14	140117008058960	2831		Adults >=15	Female	I or II	100-349	1254	3.43562		IPT and ART	0	No TB	0			DROP	3.43562
Hospital	176	07	7.0176e+13	2833		Adults >=15	Female	I or II	100-349	1255	3.43836		IPT and ART	0	No TB	0			Active	3.43836
Hospital	59	14	140059007070724	2836		Adults >=15	Female	I or II	100-349	1256	3.4411		IPT and ART	0	No TB	0			Active	3.4411
Hospital	59	14	140059008002360	2839		Adults >=15	Female	I or II	100-349	1257	3.44384		IPT and ART	0	No TB	0			Active	3.44384
Hospital	115	14	140115006300786	2841		Adults >=15	Female	I or II	100-349	1257	3.44384		IPT and ART	0	No TB	0			Active	3.44384
Hospital	117	14	140117007617268	2846		Adults >=15	Female	I or II	100-349	1257	3.44384		IPT and ART	0	No TB	0			Active	3.44384
Hospital	117	14	140117008236685	2851		Adults >=15	Female	I or II	100-349	1258	3.44658		IPT and ART	0	No TB	0			DROP	3.44658
Hospital	115	14	140115008926385	2854		Adults >=15	Female	I or II	100-349	1259	3.44932		IPT and ART	0	No TB	0			Active	3.44932
Hospital	59	14	140059007901377	2856		Adults >=15	Female	I or II	100-349	1259	3.44932		IPT and ART	0	No TB	0			Active	3.44932
Hospital	21	12	120021006985642	2865		Adults >=15	Female	I or II	100-349	1262	3.45753		IPT and ART	0	No TB	0			Active	3.45753
Hospital	153	07	7.0153e+13	2866		Adults >=15	Female	I or II	100-349	1262	3.45753		IPT and ART	0	No TB	0			Active	3.45753
Hospital	153	07	7.0153e+13	2870		Adults >=15	Female	I or II	100-349	1263	3.46027		IPT and ART	0	No TB	0			Active	3.46027
Hospital	21	12	120021007768110	2872		Adults >=15	Female	I or II	100-349	1263	3.46027		IPT and ART	0	No TB	0			TO	3.46027
Hospital	153	07	7.0153e+13	2874		Adults >=15	Female	I or II	100-349	1264	3.46301		IPT and ART	0	No TB	0			Active	3.46301
Hospital	59	14	140059008735847	2880		Adults >=15	Female	I or II	100-349	1266	3.46849		IPT and ART	0	No TB	0			DROP	3.46849
Hospital	51	07	7.0051e+13	2883		Adults >=15	Female	I or II	100-349	1267	3.47123		IPT and ART	0	No TB	0			DROP	3.47123
Hospital	21	12	120021007816820	2885		Adults >=15	Female	I or II	100-349	1267	3.47123		IPT and ART	0	No TB	0			Active	3.47123
Hospital	59	14	140059007413970	2889		Adults >=15	Female	I or II	100-349	1268	3.47397		IPT and ART	0	No TB	0			Active	3.47397
Hospital	59	14	140059006767343	2892		Adults >=15	Female	I or II	100-349	1269	3.47671		IPT and ART	0	No TB	0			Active	3.47671
Hospital	59	14	140059007323831	2894		Adults >=15	Female	I or II	100-349	1269	3.47671		IPT and ART	0	No TB	0			Active	3.47671
Hospital	47	07	7.0047e+13	2897		Adults >=15	Female	I or II	100-349	1270	3.47945		IPT and ART	0	No TB	0			Active	3.47945
Hospital	49	07	7.0049e+13	2903		Adults >=15	Female	I or II	100-349	1272	3.48493		IPT and ART	0	No TB	0			Active	3.48493
Hospital	115	14	140115007954723	2916		Adults >=15	Female	I or II	100-349	1276	3.49589		IPT and ART	0	No TB	0			Active	3.49589
Hospital	117	14	140117008217439	2935		Adults >=15	Female	I or II	100-349	1282	3.51233		IPT and ART	0	No TB	0			Active	3.51233
Hospital	21	12	120021007416378	2949		Adults >=15	Female	I or II	100-349	1288	3.52877		IPT and ART	0	No TB	0			Active	3.52877
Hospital	59	14	140059007320527	2955		Adults >=15	Female	I or II	100-349	1290	3.53425		IPT and ART	0	No TB	0			Active	3.53425
Hospital	21	12	120021006542472	2958		Adults >=15	Female	I or II	100-349	1291	3.53699		IPT and ART	0	No TB	0			Active	3.53699
Hospital	59	14	140059007851272	2964		Adults >=15	Female	I or II	100-349	1291	3.53699		IPT and ART	0	No TB	0			Active	3.53699
Hospital	110	07	7.011e+13	2975		Adults >=15	Female	I or II	100-349	1296	3.55068		IPT and ART	0	No TB	0			Active	3.55068
Hospital	59	14	140059007061334	2977		Adults >=15	Female	I or II	100-349	1296	3.55068		IPT and ART	0	No TB	0			Active	3.55068
Hospital	115	14	140115008622994	2981		Adults >=15	Female	I or II	100-349	1297	3.55342		IPT and ART	0	No TB	0			Active	3.55342
Hospital	59	14	140059007429521	2985		Adults >=15	Female	I or II	100-349	1299	3.5589		IPT and ART	0	No TB	0			Active	3.5589
Hospital	21	12	120021007793999	2986		Adults >=15	Female	I or II	100-349	1300	3.56164		IPT and ART	0	No TB	0			Active	3.56164
Hospital	21	12	120021007697121	2987		Adults >=15	Female	I or II	100-349	1300	3.56164		IPT and ART	0	No TB	0			Active	3.56164
Hospital	59	14	140059007510978	2992		Adults >=15	Female	I or II	100-349	1303	3.56986		IPT and ART	0	No TB	0			Active	3.56986
Hospital	21	12	120021007782807	2993		Adults >=15	Female	I or II	100-349	1303	3.56986		IPT and ART	0	No TB	0			Active	3.56986
Hospital	117	14	140117008176673	2996		Adults >=15	Female	I or II	100-349	1304	3.5726		IPT and ART	0	No TB	0			Active	3.5726
Hospital	59	14	140059007118826	2997		Adults >=15	Female	I or II	100-349	1304	3.5726		IPT and ART	0	No TB	0			Active	3.5726
Hospital	21	12	120021007716906	2998		Adults >=15	Female	I or II	100-349	1305	3.57534		IPT and ART	0	No TB	0			Active	3.57534
Hospital	59	14	140059007410347	3000		Adults >=15	Female	I or II	100-349	1305	3.57534		IPT and ART	0	No TB	0			Active	3.57534
Hospital	59	14	140059007937017	3007		Adults >=15	Female	I or II	100-349	1307	3.58082		IPT and ART	0	No TB	0			Active	3.58082
Hospital	59	14	140059007421178	3011		Adults >=15	Female	I or II	100-349	1309	3.5863		IPT and ART	0	No TB	0			Active	3.5863
Hospital	21	12	120021007663408	3013		Adults >=15	Female	I or II	100-349	1309	3.5863		IPT and ART	0	No TB	0			Active	3.5863
Hospital	59	14	140059007877018	3022		Adults >=15	Female	I or II	100-349	1312	3.59452		IPT and ART	0	No TB	0			Active	3.59452
Hospital	21	12	120021007799343	3025		Adults >=15	Female	I or II	100-349	1313	3.59726		IPT and ART	0	No TB	0			Active	3.59726
Hospital	115	14	140115007419980	3030		Adults >=15	Female	I or II	100-349	1313	3.59726		IPT and ART	0	No TB	0			Active	3.59726
Hospital	115	14	140115005484797	3032		Adults >=15	Female	I or II	100-349	1314	3.6		IPT and ART	0	No TB	0			Active	3.6
Hospital	47	07	7.0047e+13	3034		Adults >=15	Female	I or II	100-349	1314	3.6		IPT and ART	0	No TB	0			Active	3.6
Hospital	115	14	140115008535230	3035		Adults >=15	Female	I or II	100-349	1314	3.6		IPT and ART	0	No TB	0			Active	3.6
Hospital	117	14	140117007810353	3038		Adults >=15	Female	I or II	100-349	1316	3.60548		IPT and ART	0	No TB	0			LOST	3.60548
Hospital	21	12	120021007767264	3042		Adults >=15	Female	I or II	100-349	1318	3.61096		IPT and ART	0	No TB	0			Active	3.61096
Hospital	59	14	140059006957497	3044		Adults >=15	Female	I or II	100-349	1318	3.61096		IPT and ART	0	No TB	0			Active	3.61096
Hospital	117	14	140117008086410	3051		Adults >=15	Female	I or II	100-349	1321	3.61918		IPT and ART	0	No TB	0			Active	3.61918
Hospital	21	12	120021007560080	3052		Adults >=15	Female	I or II	100-349	1322	3.62192		IPT and ART	0	No TB	0			Active	3.62192
Hospital	59	14	140059006909753	3069		Adults >=15	Female	I or II	100-349	1327	3.63562		IPT and ART	0	No TB	0			Active	3.63562
Hospital	21	12	120021007783641	3075		Adults >=15	Female	I or II	100-349	1329	3.6411		IPT and ART	0	No TB	0			Active	3.6411
Hospital	21	12	120021007480992	3087		Adults >=15	Female	I or II	100-349	1332	3.64932		IPT and ART	0	No TB	0			Active	3.64932
Hospital	21	12	120021007748460	3089		Adults >=15	Female	I or II	100-349	1333	3.65205		IPT and ART	0	No TB	0			Active	3.65205
Hospital	117	14	140117007627544	3095		Adults >=15	Female	I or II	100-349	1334	3.65479		IPT and ART	0	No TB	0			Active	3.65479
Hospital	51	07	7.0051e+13	3098		Adults >=15	Female	I or II	100-349	1335	3.65753		IPT and ART	0	No TB	0			Active	3.65753
Hospital	21	12	120021007743703	3105		Adults >=15	Female	I or II	100-349	1337	3.66301		IPT and ART	0	No TB	0			Active	3.66301
Hospital	49	07	7.0049e+13	3106		Adults >=15	Female	I or II	100-349	1337	3.66301		IPT and ART	0	No TB	0			Active	3.66301
Hospital	21	12	120021007649693	3110		Adults >=15	Female	I or II	100-349	1339	3.66849		IPT and ART	0	No TB	0			Active	3.66849
Hospital	59	14	140059007841886	3113		Adults >=15	Female	I or II	100-349	1340	3.67123		IPT and ART	0	No TB	0			Active	3.67123
Hospital	21	12	120021007773594	3114		Adults >=15	Female	I or II	100-349	1340	3.67123		IPT and ART	0	No TB	0			Active	3.67123
Hospital	117	14	140117008161090	3117		Adults >=15	Female	I or II	100-349	1340	3.67123		IPT and ART	0	No TB	0			TO	3.67123
Hospital	115	14	140115008360539	3119		Adults >=15	Female	I or II	100-349	1341	3.67397		IPT and ART	0	No TB	0			Active	3.67397
Hospital	59	14	140059008028781	3121		Adults >=15	Female	I or II	100-349	1342	3.67671		IPT and ART	0	No TB	0			Active	3.67671
Hospital	21	12	120021007727535	3122		Adults >=15	Female	I or II	100-349	1342	3.67671		IPT and ART	0	No TB	0			Active	3.67671
Hospital	117	14	140117008320205	3135		Adults >=15	Female	I or II	100-349	1347	3.69041		IPT and ART	0	No TB	0			Active	3.69041
Hospital	21	12	120021007765569	3136		Adults >=15	Female	I or II	100-349	1347	3.69041		IPT and ART	0	No TB	0			Active	3.69041
Hospital	59	14	140059007369601	3139		Adults >=15	Female	I or II	100-349	1348	3.69315		IPT and ART	0	No TB	0			Active	3.69315
Hospital	21	12	120021007651596	3146		Adults >=15	Female	I or II	100-349	1350	3.69863		IPT and ART	0	No TB	0			Active	3.69863
Hospital	21	12	120021007407924	3158		Adults >=15	Female	I or II	100-349	1354	3.70959		IPT and ART	0	No TB	0			Active	3.70959
Hospital	21	12	120021006863803	3163		Adults >=15	Female	I or II	100-349	1355	3.71233		IPT and ART	0	No TB	0			Active	3.71233
Hospital	153	07	7.0153e+13	3170		Adults >=15	Female	I or II	100-349	1357	3.71781		IPT and ART	0	No TB	0			Active	3.71781
Hospital	59	14	140059011442406	3173		Adults >=15	Female	I or II	100-349	1358	3.72055		IPT and ART	0	No TB	0			Active	3.72055
Hospital	115	14	140115006442540	3175		Adults >=15	Female	I or II	100-349	1358	3.72055		IPT and ART	0	No TB	0			Active	3.72055
Hospital	49	07	7.0049e+13	3180		Adults >=15	Female	I or II	100-349	1362	3.73151		IPT and ART	0	No TB	0			Active	3.73151
Hospital	117	14	140117007745436	3184		Adults >=15	Female	I or II	100-349	1364	3.73699		IPT and ART	0	No TB	0			DROP	3.73699
Hospital	21	12	120021007111512	3186		Adults >=15	Female	I or II	100-349	1364	3.73699		IPT and ART	0	No TB	0			Active	3.73699
Hospital	115	14	140115008660601	3189		Adults >=15	Female	I or II	100-349	1364	3.73699		IPT and ART	0	No TB	0			Active	3.73699
Hospital	110	07	7.011e+13	3191		Adults >=15	Female	I or II	100-349	1365	3.73973		IPT and ART	0	No TB	0			TO	3.73973
Hospital	21	12	120021007566828	3195		Adults >=15	Female	I or II	100-349	1366	3.74247		IPT and ART	0	No TB	0			Active	3.74247
Hospital	21	12	120021007719574	3196		Adults >=15	Female	I or II	100-349	1366	3.74247		IPT and ART	0	No TB	0			Active	3.74247
Hospital	49	07	7.0049e+13	3200		Adults >=15	Female	I or II	100-349	1367	3.74521		IPT and ART	0	No TB	0			Active	3.74521
Hospital	153	07	7.0153e+13	3206		Adults >=15	Female	I or II	100-349	1369	3.75068		IPT and ART	0	No TB	0			Active	3.75068
Hospital	59	14	140059007384610	3212		Adults >=15	Female	I or II	100-349	1370	3.75342		IPT and ART	0	No TB	0			Active	3.75342
Hospital	59	14	140059007789869	3218		Adults >=15	Female	I or II	100-349	1371	3.75616		IPT and ART	0	No TB	0			Active	3.75616
Hospital	21	12	120021007619724	3224		Adults >=15	Female	I or II	100-349	1372	3.7589		IPT and ART	0	No TB	0			Active	3.7589
Hospital	117	14	140117008144969	3230		Adults >=15	Female	I or II	100-349	1373	3.76164		IPT and ART	0	No TB	0			Active	3.76164
Hospital	51	07	7.0051e+13	3239		Adults >=15	Female	I or II	100-349	1377	3.7726		IPT and ART	0	No TB	0			Active	3.7726
Hospital	153	07	7.0153e+13	3245		Adults >=15	Female	I or II	100-349	1379	3.77808		IPT and ART	0	No TB	0			Active	3.77808
Hospital	21	12	120021007582738	3251		Adults >=15	Female	I or II	100-349	1379	3.77808		IPT and ART	0	No TB	0			Active	3.77808
Hospital	115	14	140115008068090	3259		Adults >=15	Female	I or II	100-349	1382	3.7863		IPT and ART	0	No TB	0			Active	3.7863
Hospital	21	12	120021007674153	3263		Adults >=15	Female	I or II	100-349	1383	3.78904		IPT and ART	0	No TB	0			Active	3.78904
Hospital	117	14	140117006796824	3264		Adults >=15	Female	I or II	100-349	1384	3.79178		IPT and ART	0	No TB	0			Active	3.79178
Hospital	117	14	140117005537334	3265		Adults >=15	Female	I or II	100-349	1384	3.79178		IPT and ART	0	No TB	0			Active	3.79178
Hospital	21	12	120021007675546	3271		Adults >=15	Female	I or II	100-349	1387	3.8		IPT and ART	0	No TB	0			Active	3.8
Hospital	153	07	7.0153e+13	3303		Adults >=15	Female	I or II	100-349	1399	3.83288		IPT and ART	0	No TB	0			Active	3.83288
Hospital	49	07	7.0049e+13	3305		Adults >=15	Female	I or II	100-349	1399	3.83288		IPT and ART	0	No TB	0			Active	3.83288
Hospital	115	14	140115008619389	3314		Adults >=15	Female	I or II	100-349	1401	3.83836		IPT and ART	0	No TB	0			Active	3.83836
Hospital	21	12	120021007475906	3317		Adults >=15	Female	I or II	100-349	1403	3.84384		IPT and ART	0	No TB	0			Active	3.84384
Hospital	59	14	140059007571474	3321		Adults >=15	Female	I or II	100-349	1404	3.84658		IPT and ART	0	No TB	0			Active	3.84658
Hospital	117	14	140117005996452	3322		Adults >=15	Female	I or II	100-349	1405	3.84932		IPT and ART	0	No TB	0			Active	3.84932
Hospital	59	14	140059007026427	3323		Adults >=15	Female	I or II	100-349	1405	3.84932		IPT and ART	0	No TB	0			Active	3.84932
Hospital	115	14	140115008289037	3325		Adults >=15	Female	I or II	100-349	1405	3.84932		IPT and ART	0	No TB	0			Active	3.84932
Hospital	117	14	140117005942799	3328		Adults >=15	Female	I or II	100-349	1406	3.85205		IPT and ART	0	No TB	0			Active	3.85205
Hospital	117	14	140117007935945	3334		Adults >=15	Female	I or II	100-349	1408	3.85753		IPT and ART	0	No TB	0			Active	3.85753
Hospital	115	14	140115008269757	3336		Adults >=15	Female	I or II	100-349	1408	3.85753		IPT and ART	0	No TB	0			Active	3.85753
Hospital	21	12	120021007531552	3365		Adults >=15	Female	I or II	100-349	1421	3.89315		IPT and ART	0	No TB	0			Active	3.89315
Hospital	51	07	7.0051e+13	3370		Adults >=15	Female	I or II	100-349	1423	3.89863		IPT and ART	0	No TB	0			Active	3.89863
Hospital	21	12	120021007050123	3371		Adults >=15	Female	I or II	100-349	1423	3.89863		IPT and ART	0	No TB	0			Active	3.89863
Hospital	21	12	120021006824374	3374		Adults >=15	Female	I or II	100-349	1426	3.90685		IPT and ART	0	No TB	0			Active	3.90685
Hospital	49	07	7.0049e+13	3381		Adults >=15	Female	I or II	100-349	1427	3.90959		IPT and ART	0	No TB	0			Active	3.90959
Hospital	47	07	7.0047e+13	3388		Adults >=15	Female	I or II	100-349	1430	3.91781		IPT and ART	0	No TB	0			Active	3.91781
Hospital	21	12	120021006456770	3389		Adults >=15	Female	I or II	100-349	1430	3.91781		IPT and ART	0	No TB	0			Active	3.91781
Hospital	21	12	120021007301148	3393		Adults >=15	Female	I or II	100-349	1431	3.92055		IPT and ART	0	No TB	0			Active	3.92055
Hospital	59	14	140059007900637	3394		Adults >=15	Female	I or II	100-349	1432	3.92329		IPT and ART	0	No TB	0			Active	3.92329
Hospital	21	12	120021006463029	3404		Adults >=15	Female	I or II	100-349	1437	3.93699		IPT and ART	0	No TB	0			Active	3.93699
Hospital	21	12	120021007171657	3408		Adults >=15	Female	I or II	100-349	1438	3.93973		IPT and ART	0	No TB	0			Active	3.93973
Hospital	21	12	120021007554335	3417		Adults >=15	Female	I or II	100-349	1440	3.94521		IPT and ART	0	No TB	0			Active	3.94521
Hospital	51	07	7.0051e+13	3418		Adults >=15	Female	I or II	100-349	1441	3.94795		IPT and ART	0	No TB	0			Active	3.94795
Hospital	117	14	140117007932003	3419		Adults >=15	Female	I or II	100-349	1441	3.94795		IPT and ART	0	No TB	0			Active	3.94795
Hospital	117	14	140117007189922	3427		Adults >=15	Female	I or II	100-349	1444	3.95616		IPT and ART	0	No TB	0			Active	3.95616
Hospital	21	12	120021006861711	3428		Adults >=15	Female	I or II	100-349	1444	3.95616		IPT and ART	0	No TB	0			Active	3.95616
Hospital	115	14	140115007066467	3433		Adults >=15	Female	I or II	100-349	1445	3.9589		IPT and ART	0	No TB	0			Active	3.9589
Hospital	115	14	140115008565793	3435		Adults >=15	Female	I or II	100-349	1447	3.96438		IPT and ART	0	No TB	0			Active	3.96438
Hospital	117	14	140117008204945	3437		Adults >=15	Female	I or II	100-349	1448	3.96712		IPT and ART	0	No TB	0			Active	3.96712
Hospital	117	14	140117008019942	3438		Adults >=15	Female	I or II	100-349	1448	3.96712		IPT and ART	0	No TB	0			Active	3.96712
Hospital	51	07	7.0051e+13	3442		Adults >=15	Female	I or II	100-349	1448	3.96712		IPT and ART	0	No TB	0			Active	3.96712
Hospital	49	07	7.0049e+13	3448		Adults >=15	Female	I or II	100-349	1450	3.9726		IPT and ART	0	No TB	0			Active	3.9726
Hospital	117	14	140117007832411	3458		Adults >=15	Female	I or II	100-349	1454	3.98356		IPT and ART	0	No TB	0			Active	3.98356
Hospital	115	14	140115008331827	3467		Adults >=15	Female	I or II	100-349	1459	3.99726		IPT and ART	0	No TB	0			Active	3.99726
Hospital	21	12	120021007693937	3471		Adults >=15	Female	I or II	100-349	1460	4		IPT and ART	0	No TB	0			Active	4
Hospital	49	07	7.0049e+13	3475		Adults >=15	Female	I or II	100-349	1461	4.00274		IPT and ART	0	No TB	0			Active	4.00274
Hospital	21	12	120021007498316	3476		Adults >=15	Female	I or II	100-349	1462	4.00548		IPT and ART	0	No TB	0			Active	4.00548
Hospital	49	07	7.0049e+13	3484		Adults >=15	Female	I or II	100-349	1463	4.00822		IPT and ART	0	No TB	0			Active	4.00822
Hospital	21	12	120021007057898	3489		Adults >=15	Female	I or II	100-349	1464	4.01096		IPT and ART	0	No TB	0			Active	4.01096
Hospital	21	12	120021007512618	3490		Adults >=15	Female	I or II	100-349	1464	4.01096		IPT and ART	0	No TB	0			TO	4.01096
Hospital	21	12	120021006543912	3493		Adults >=15	Female	I or II	100-349	1465	4.0137		IPT and ART	0	No TB	0			Active	4.0137
Hospital	117	14	140117007972121	3515		Adults >=15	Female	I or II	100-349	1471	4.03014		IPT and ART	0	No TB	0			Active	4.03014
Hospital	115	14	140115006070738	3516		Adults >=15	Female	I or II	100-349	1472	4.03288		IPT and ART	0	No TB	0			Active	4.03288
Hospital	51	07	7.0051e+13	3518		Adults >=15	Female	I or II	100-349	1472	4.03288		IPT and ART	0	No TB	0			Active	4.03288
Hospital	117	14	140117008290794	3520		Adults >=15	Female	I or II	100-349	1474	4.03836		IPT and ART	0	No TB	0			Active	4.03836
Hospital	21	12	120021007624619	3521		Adults >=15	Female	I or II	100-349	1474	4.03836		IPT and ART	0	No TB	0			Active	4.03836
Hospital	49	07	7.0049e+13	3534		Adults >=15	Female	I or II	100-349	1478	4.04932		IPT and ART	0	No TB	0			Active	4.04932
Hospital	51	07	7.0051e+13	3542		Adults >=15	Female	I or II	100-349	1484	4.06575		IPT and ART	0	No TB	0			Active	4.06575
Hospital	51	07	7.0051e+13	3546		Adults >=15	Female	I or II	100-349	1487	4.07397		IPT and ART	0	No TB	0			Active	4.07397
Hospital	59	14	140059007813592	3550		Adults >=15	Female	I or II	100-349	1488	4.07671		IPT and ART	0	No TB	0			Active	4.07671
Hospital	21	12	120021007095893	3553		Adults >=15	Female	I or II	100-349	1489	4.07945		IPT and ART	0	No TB	0			Active	4.07945
Hospital	21	12	120021007073270	3567		Adults >=15	Female	I or II	100-349	1494	4.09315		IPT and ART	0	No TB	0			Active	4.09315
Hospital	117	14	140117007387090	3568		Adults >=15	Female	I or II	100-349	1494	4.09315		IPT and ART	0	No TB	0			Active	4.09315
Hospital	21	12	120021007607878	3572		Adults >=15	Female	I or II	100-349	1496	4.09863		IPT and ART	0	No TB	0			Active	4.09863
Hospital	117	14	140117006008813	3575		Adults >=15	Female	I or II	100-349	1498	4.10411		IPT and ART	0	No TB	0			Active	4.10411
Hospital	21	12	120021007507690	3577		Adults >=15	Female	I or II	100-349	1498	4.10411		IPT and ART	0	No TB	0			Active	4.10411
Hospital	115	14	140115009206734	3581		Adults >=15	Female	I or II	100-349	1500	4.10959		IPT and ART	0	No TB	0			Active	4.10959
Hospital	21	12	120021005860786	3584		Adults >=15	Female	I or II	100-349	1500	4.10959		IPT and ART	0	No TB	0			Active	4.10959
Hospital	21	12	120021007506592	3586		Adults >=15	Female	I or II	100-349	1501	4.11233		IPT and ART	0	No TB	0			Active	4.11233
Hospital	21	12	120021006569481	3590		Adults >=15	Female	I or II	100-349	1503	4.11781		IPT and ART	0	No TB	0			Active	4.11781
Hospital	51	07	7.0051e+13	3591		Adults >=15	Female	I or II	100-349	1503	4.11781		IPT and ART	0	No TB	0			Active	4.11781
Hospital	49	07	7.0049e+13	3594		Adults >=15	Female	I or II	100-349	1503	4.11781		IPT and ART	0	No TB	0			Active	4.11781
Hospital	21	12	120021007574045	3599		Adults >=15	Female	I or II	100-349	1504	4.12055		IPT and ART	0	No TB	0			Active	4.12055
Hospital	21	12	120021006940222	3613		Adults >=15	Female	I or II	100-349	1510	4.13699		IPT and ART	0	No TB	0			Active	4.13699
Hospital	21	12	120021007562162	3614		Adults >=15	Female	I or II	100-349	1511	4.13973		IPT and ART	0	No TB	0			Active	4.13973
Hospital	117	14	140117007936660	3615		Adults >=15	Female	I or II	100-349	1511	4.13973		IPT and ART	0	No TB	0			Active	4.13973
Hospital	59	14	140059006964136	3626		Adults >=15	Female	I or II	100-349	1515	4.15068		IPT and ART	0	No TB	0			Active	4.15068
Hospital	117	14	140117007377134	3632		Adults >=15	Female	I or II	100-349	1518	4.1589		IPT and ART	0	No TB	0			Active	4.1589
Hospital	49	07	7.0049e+13	3634		Adults >=15	Female	I or II	100-349	1518	4.1589		IPT and ART	0	No TB	0			Active	4.1589
Hospital	115	14	140115008457868	3640		Adults >=15	Female	I or II	100-349	1519	4.16164		IPT and ART	0	No TB	0			Active	4.16164
Hospital	117	14	140117005926926	3642		Adults >=15	Female	I or II	100-349	1520	4.16438		IPT and ART	0	No TB	0			Active	4.16438
Hospital	117	14	140117008001020	3645		Adults >=15	Female	I or II	100-349	1521	4.16712		IPT and ART	0	No TB	0			Active	4.16712
Hospital	117	14	140117007941296	3656		Adults >=15	Female	I or II	100-349	1524	4.17534		IPT and ART	0	No TB	0			Active	4.17534
Hospital	21	12	120021007491088	3657		Adults >=15	Female	I or II	100-349	1525	4.17808		IPT and ART	0	No TB	0			TO	4.17808
Hospital	59	14	140059004779124	3658		Adults >=15	Female	I or II	100-349	1526	4.18082		IPT and ART	0	No TB	0			Active	4.18082
Hospital	117	14	140117007969704	3670		Adults >=15	Female	I or II	100-349	1528	4.1863		IPT and ART	0	No TB	0			Active	4.1863
Hospital	117	14	140117007668094	3673		Adults >=15	Female	I or II	100-349	1529	4.18904		IPT and ART	0	No TB	0			Active	4.18904
Hospital	117	14	140117007731053	3678		Adults >=15	Female	I or II	100-349	1532	4.19726		IPT and ART	0	No TB	0			Active	4.19726
Hospital	117	14	140117007826044	3680		Adults >=15	Female	I or II	100-349	1533	4.2		IPT and ART	0	No TB	0			LOST	4.2
Hospital	21	12	120021007572503	3708		Adults >=15	Female	I or II	100-349	1538	4.2137		IPT and ART	0	No TB	0			Active	4.2137
Hospital	21	12	120021003828641	3713		Adults >=15	Female	I or II	100-349	1539	4.21644		IPT and ART	0	No TB	0			Active	4.21644
Hospital	117	14	140117007952263	3729		Adults >=15	Female	I or II	100-349	1545	4.23288		IPT and ART	0	No TB	0			Active	4.23288
Hospital	115	14	140115008890273	3735		Adults >=15	Female	I or II	100-349	1547	4.23836		IPT and ART	0	No TB	0			Active	4.23836
Hospital	51	07	70051006565265	3742		Adults >=15	Female	I or II	100-349	1548	4.2411		IPT and ART	0	No TB	0			TO	4.2411
Hospital	21	12	120021007128496	3743		Adults >=15	Female	I or II	100-349	1549	4.24384		IPT and ART	0	No TB	0			Active	4.24384
Hospital	117	14	140117008153062	3744		Adults >=15	Female	I or II	100-349	1549	4.24384		IPT and ART	0	No TB	0			Active	4.24384
Hospital	117	14	140117007652546	3754		Adults >=15	Female	I or II	100-349	1553	4.25479		IPT and ART	0	No TB	0			Active	4.25479
Hospital	117	14	140117005971262	3761		Adults >=15	Female	I or II	100-349	1555	4.26027		IPT and ART	0	No TB	0			Active	4.26027
Hospital	49	07	7.0049e+13	3766		Adults >=15	Female	I or II	100-349	1556	4.26301		IPT and ART	0	No TB	0			Active	4.26301
Hospital	21	12	120021007323831	3773		Adults >=15	Female	I or II	100-349	1558	4.26849		IPT and ART	0	No TB	0			Active	4.26849
Hospital	117	14	140117007903966	3782		Adults >=15	Female	I or II	100-349	1563	4.28219		IPT and ART	0	No TB	0			Active	4.28219
Hospital	117	14	140117006680855	3785		Adults >=15	Female	I or II	100-349	1565	4.28767		IPT and ART	0	No TB	0			Active	4.28767
Hospital	117	14	140117008053251	3786		Adults >=15	Female	I or II	100-349	1566	4.29041		IPT and ART	0	No TB	0			Active	4.29041
Hospital	117	14	140117007755339	3804		Adults >=15	Female	I or II	100-349	1576	4.31781		IPT and ART	0	No TB	0			Active	4.31781
Hospital	117	14	140117007677400	3806		Adults >=15	Female	I or II	100-349	1576	4.31781		IPT and ART	0	No TB	0			Active	4.31781
Hospital	115	14	140115008937481	3812		Adults >=15	Female	I or II	100-349	1579	4.32603		IPT and ART	0	No TB	0			Active	4.32603
Hospital	117	14	140117008245384	3816		Adults >=15	Female	I or II	100-349	1582	4.33425		IPT and ART	0	No TB	0			Active	4.33425
Hospital	117	14	140117008154213	3818		Adults >=15	Female	I or II	100-349	1582	4.33425		IPT and ART	0	No TB	0			Active	4.33425
Hospital	117	14	140117007825245	3820		Adults >=15	Female	I or II	100-349	1583	4.33699		IPT and ART	0	No TB	0			Active	4.33699
Hospital	117	14	140117008264621	3829		Adults >=15	Female	I or II	100-349	1588	4.35068		IPT and ART	0	No TB	0			Active	4.35068
Hospital	115	14	140115007885329	3833		Adults >=15	Female	I or II	100-349	1589	4.35342		IPT and ART	0	No TB	0			Active	4.35342
Hospital	117	14	140117008234300	3841		Adults >=15	Female	I or II	100-349	1593	4.36438		IPT and ART	0	No TB	0			Active	4.36438
Hospital	117	14	140117008192294	3844		Adults >=15	Female	I or II	100-349	1594	4.36712		IPT and ART	0	No TB	0			Active	4.36712
Hospital	59	14	140059007504392	3845		Adults >=15	Female	I or II	100-349	1595	4.36986		IPT and ART	0	No TB	0			Active	4.36986
Hospital	115	14	140115007086738	3850		Adults >=15	Female	I or II	100-349	1598	4.37808		IPT and ART	0	No TB	0			Active	4.37808
Hospital	117	14	140117002708050	3853		Adults >=15	Female	I or II	100-349	1598	4.37808		IPT and ART	0	No TB	0			Active	4.37808
Hospital	117	14	140117007044905	3854		Adults >=15	Female	I or II	100-349	1599	4.38082		IPT and ART	0	No TB	0			Active	4.38082
Hospital	117	14	140117007288928	3855		Adults >=15	Female	I or II	100-349	1599	4.38082		IPT and ART	0	No TB	0			Active	4.38082
Hospital	51	07	7.0051e+13	3858		Adults >=15	Female	I or II	100-349	1600	4.38356		IPT and ART	0	No TB	0			Active	4.38356
Hospital	117	14	140117008210124	3861		Adults >=15	Female	I or II	100-349	1601	4.3863		IPT and ART	0	No TB	0			Active	4.3863
Hospital	117	14	140117008010360	3862		Adults >=15	Female	I or II	100-349	1601	4.3863		IPT and ART	0	No TB	0			Active	4.3863
Hospital	117	14	140117008176392	3866		Adults >=15	Female	I or II	100-349	1603	4.39178		IPT and ART	0	No TB	0			Active	4.39178
Hospital	59	14	140059007431892	3872		Adults >=15	Female	I or II	100-349	1605	4.39726		IPT and ART	0	No TB	0			Active	4.39726
Hospital	59	14	140059007483807	3875		Adults >=15	Female	I or II	100-349	1605	4.39726		IPT and ART	0	No TB	0			Active	4.39726
Hospital	49	07	7.0049e+13	3882		Adults >=15	Female	I or II	100-349	1609	4.40822		IPT and ART	0	No TB	0			Active	4.40822
Hospital	117	14	140117008151910	3883		Adults >=15	Female	I or II	100-349	1610	4.41096		IPT and ART	0	No TB	0			Active	4.41096
Hospital	21	12	120021006715383	3885		Adults >=15	Female	I or II	100-349	1610	4.41096		IPT and ART	0	No TB	0			Active	4.41096
Hospital	117	14	140117007377759	3886		Adults >=15	Female	I or II	100-349	1611	4.4137		IPT and ART	0	No TB	0			Active	4.4137
Hospital	117	14	140117006797940	3888		Adults >=15	Female	I or II	100-349	1611	4.4137		IPT and ART	0	No TB	0			Active	4.4137
Hospital	59	14	140059006771936	3894		Adults >=15	Female	I or II	100-349	1614	4.42192		IPT and ART	0	No TB	0			Active	4.42192
Hospital	117	14	140117004941642	3895		Adults >=15	Female	I or II	100-349	1614	4.42192		IPT and ART	0	No TB	0			Active	4.42192
Hospital	59	14	140059007807103	3901		Adults >=15	Female	I or II	100-349	1616	4.4274		IPT and ART	0	No TB	0			Active	4.4274
Hospital	117	14	140117005318120	3904		Adults >=15	Female	I or II	100-349	1617	4.43014		IPT and ART	0	No TB	0			Active	4.43014
Hospital	117	14	140117007127694	3905		Adults >=15	Female	I or II	100-349	1618	4.43288		IPT and ART	0	No TB	0			Active	4.43288
Hospital	117	14	140117006538140	3906		Adults >=15	Female	I or II	100-349	1618	4.43288		IPT and ART	0	No TB	0			Active	4.43288
Hospital	153	07	7.0153e+13	3907		Adults >=15	Female	I or II	100-349	1618	4.43288		IPT and ART	0	No TB	0			Active	4.43288
Hospital	117	14	140117007143618	3917		Adults >=15	Female	I or II	100-349	1621	4.4411		IPT and ART	0	No TB	0			Active	4.4411
Hospital	59	14	140059007041412	3919		Adults >=15	Female	I or II	100-349	1622	4.44384		IPT and ART	0	No TB	0			Active	4.44384
Hospital	117	14	140117007607878	3922		Adults >=15	Female	I or II	100-349	1623	4.44658		IPT and ART	0	No TB	0			Active	4.44658
Hospital	59	14	140059007272398	3925		Adults >=15	Female	I or II	100-349	1624	4.44932		IPT and ART	0	No TB	0			Active	4.44932
Hospital	21	12	120021007478170	3930		Adults >=15	Female	I or II	100-349	1626	4.45479		IPT and ART	0	No TB	0			Active	4.45479
Hospital	117	14	140117007993958	3935		Adults >=15	Female	I or II	100-349	1631	4.46849		IPT and ART	0	No TB	0			Active	4.46849
Hospital	117	14	140117006052089	3936		Adults >=15	Female	I or II	100-349	1631	4.46849		IPT and ART	0	No TB	0			Active	4.46849
Hospital	117	14	140117007863267	3938		Adults >=15	Female	I or II	100-349	1631	4.46849		IPT and ART	0	No TB	0			Active	4.46849
Hospital	117	14	140117007910591	3944		Adults >=15	Female	I or II	100-349	1633	4.47397		IPT and ART	0	No TB	0			Active	4.47397
Hospital	47	07	70047005886104	3947		Adults >=15	Female	I or II	100-349	1633	4.47397		IPT and ART	0	No TB	0			Active	4.47397
Hospital	115	14	140115009025576	3957		Adults >=15	Female	I or II	100-349	1638	4.48767		IPT and ART	0	No TB	0			Active	4.48767
Hospital	21	12	120021007597396	3966		Adults >=15	Female	I or II	100-349	1641	4.49589		IPT and ART	0	No TB	0			Active	4.49589
Hospital	117	14	140117008121480	3969		Adults >=15	Female	I or II	100-349	1643	4.50137		IPT and ART	0	No TB	0			Active	4.50137
Hospital	117	14	140117007756195	3973		Adults >=15	Female	I or II	100-349	1644	4.50411		IPT and ART	0	No TB	0			Active	4.50411
Hospital	153	07	7.0153e+13	3975		Adults >=15	Female	I or II	100-349	1645	4.50685		IPT and ART	0	No TB	0			Active	4.50685
Hospital	117	14	140117008225235	3976		Adults >=15	Female	I or II	100-349	1646	4.50959		IPT and ART	0	No TB	0			Active	4.50959
Hospital	117	14	140117007637234	3978		Adults >=15	Female	I or II	100-349	1646	4.50959		IPT and ART	0	No TB	0			Active	4.50959
Hospital	117	14	140117006703188	3979		Adults >=15	Female	I or II	100-349	1646	4.50959		IPT and ART	0	No TB	0			Active	4.50959
Hospital	51	07	7.0051e+13	3980		Adults >=15	Female	I or II	100-349	1646	4.50959		IPT and ART	0	No TB	0			Active	4.50959
Hospital	117	14	140117007629976	3988		Adults >=15	Female	I or II	100-349	1649	4.51781		IPT and ART	0	No TB	0			Active	4.51781
Hospital	117	14	140117007370231	3990		Adults >=15	Female	I or II	100-349	1651	4.52329		IPT and ART	0	No TB	0			Active	4.52329
Hospital	115	14	140115009012621	3991		Adults >=15	Female	I or II	100-349	1651	4.52329		IPT and ART	0	No TB	0			Active	4.52329
Hospital	49	07	7.0049e+13	4002		Adults >=15	Female	I or II	100-349	1652	4.52603		IPT and ART	0	No TB	0			Active	4.52603
Hospital	117	14	140117007644441	4003		Adults >=15	Female	I or II	100-349	1653	4.52877		IPT and ART	0	No TB	0			Active	4.52877
Hospital	117	14	140117008193400	4024		Adults >=15	Female	I or II	100-349	1660	4.54795		IPT and ART	0	No TB	0			Active	4.54795
Hospital	117	14	140117007463937	4032		Adults >=15	Female	I or II	100-349	1666	4.56438		IPT and ART	0	No TB	0			Active	4.56438
Hospital	117	14	140117008121183	4033		Adults >=15	Female	I or II	100-349	1666	4.56438		IPT and ART	0	No TB	0			Active	4.56438
Hospital	117	14	140117008178639	4042		Adults >=15	Female	I or II	100-349	1668	4.56986		IPT and ART	0	No TB	0			Active	4.56986
Hospital	115	14	140115008899048	4043		Adults >=15	Female	I or II	100-349	1668	4.56986		IPT and ART	0	No TB	0			Active	4.56986
Hospital	47	07	7.0047e+13	4051		Adults >=15	Female	I or II	100-349	1671	4.57808		IPT and ART	0	No TB	0			Active	4.57808
Hospital	117	14	140117007584773	4054		Adults >=15	Female	I or II	100-349	1672	4.58082		IPT and ART	0	No TB	0			Active	4.58082
Hospital	51	07	7.0051e+13	4060		Adults >=15	Female	I or II	100-349	1675	4.58904		IPT and ART	0	No TB	0			Active	4.58904
Hospital	117	14	140117005869297	4063		Adults >=15	Female	I or II	100-349	1675	4.58904		IPT and ART	0	No TB	0			Active	4.58904
Hospital	117	14	140117007999343	4067		Adults >=15	Female	I or II	100-349	1677	4.59452		IPT and ART	0	No TB	0			Active	4.59452
Hospital	117	14	140117008263075	4068		Adults >=15	Female	I or II	100-349	1677	4.59452		IPT and ART	0	No TB	0			Active	4.59452
Hospital	59	14	140059007879670	4072		Adults >=15	Female	I or II	100-349	1678	4.59726		IPT and ART	0	No TB	0			Active	4.59726
Hospital	117	14	140117004990433	4075		Adults >=15	Female	I or II	100-349	1679	4.6		IPT and ART	0	No TB	0			Active	4.6
Hospital	59	14	140059007812378	4080		Adults >=15	Female	I or II	100-349	1680	4.60274		IPT and ART	0	No TB	0			Active	4.60274
Hospital	117	14	140117008128585	4083		Adults >=15	Female	I or II	100-349	1681	4.60548		IPT and ART	0	No TB	0			Active	4.60548
Hospital	117	14	140117004430817	4091		Adults >=15	Female	I or II	100-349	1683	4.61096		IPT and ART	0	No TB	0			Active	4.61096
Hospital	117	14	140117008235626	4098		Adults >=15	Female	I or II	100-349	1686	4.61918		IPT and ART	0	No TB	0			Active	4.61918
Hospital	117	14	140117007608871	4099		Adults >=15	Female	I or II	100-349	1686	4.61918		IPT and ART	0	No TB	0			Active	4.61918
Hospital	117	14	140117008124151	4100		Adults >=15	Female	I or II	100-349	1686	4.61918		IPT and ART	0	No TB	0			Active	4.61918
Hospital	117	14	140117008145550	4103		Adults >=15	Female	I or II	100-349	1687	4.62192		IPT and ART	0	No TB	0			Active	4.62192
Hospital	117	14	140117007951911	4107		Adults >=15	Female	I or II	100-349	1689	4.6274		IPT and ART	0	No TB	0			Active	4.6274
Hospital	117	14	140117007297091	4110		Adults >=15	Female	I or II	100-349	1691	4.63288		IPT and ART	0	No TB	0			Active	4.63288
Hospital	117	14	140117007513164	4112		Adults >=15	Female	I or II	100-349	1692	4.63562		IPT and ART	0	No TB	0			Active	4.63562
Hospital	59	14	140059008051341	4115		Adults >=15	Female	I or II	100-349	1694	4.6411		IPT and ART	0	No TB	0			Active	4.6411
Hospital	117	14	140117008178358	4117		Adults >=15	Female	I or II	100-349	1694	4.6411		IPT and ART	0	No TB	0			Active	4.6411
Hospital	117	14	140117008199189	4124		Adults >=15	Female	I or II	100-349	1698	4.65205		IPT and ART	0	No TB	0			Active	4.65205
Hospital	117	14	140117008200563	4125		Adults >=15	Female	I or II	100-349	1699	4.65479		IPT and ART	0	No TB	0			Active	4.65479
Hospital	117	14	140117007839526	4130		Adults >=15	Female	I or II	100-349	1701	4.66027		IPT and ART	0	No TB	0			Active	4.66027
Hospital	153	07	7.0153e+13	4150		Adults >=15	Female	I or II	100-349	1707	4.67671		IPT and ART	0	No TB	0			Active	4.67671
Hospital	117	14	140117007418781	4151		Adults >=15	Female	I or II	100-349	1708	4.67945		IPT and ART	0	No TB	0			Active	4.67945
Hospital	117	14	140117008199739	4155		Adults >=15	Female	I or II	100-349	1711	4.68767		IPT and ART	0	No TB	0			Active	4.68767
Hospital	117	14	140117008127995	4156		Adults >=15	Female	I or II	100-349	1711	4.68767		IPT and ART	0	No TB	0			Active	4.68767
Hospital	115	14	140115009111514	4160		Adults >=15	Female	I or II	100-349	1712	4.69041		IPT and ART	0	No TB	0			Active	4.69041
Hospital	117	14	140117008233769	4162		Adults >=15	Female	I or II	100-349	1713	4.69315		IPT and ART	0	No TB	0			Active	4.69315
Hospital	117	14	140117007631917	4163		Adults >=15	Female	I or II	100-349	1713	4.69315		IPT and ART	0	No TB	0			Active	4.69315
Hospital	51	07	7.0051e+13	4173		Adults >=15	Female	I or II	100-349	1722	4.71781		IPT and ART	0	No TB	0			Active	4.71781
Hospital	115	14	140115008760923	4178		Adults >=15	Female	I or II	100-349	1727	4.73151		IPT and ART	0	No TB	0			Active	4.73151
Hospital	47	07	7.0047e+13	4180		Adults >=15	Female	I or II	100-349	1727	4.73151		IPT and ART	0	No TB	0			Active	4.73151
Hospital	117	14	140117008011355	4181		Adults >=15	Female	I or II	100-349	1727	4.73151		IPT and ART	0	No TB	0			Active	4.73151
Hospital	117	14	140117006818924	4182		Adults >=15	Female	I or II	100-349	1728	4.73425		IPT and ART	0	No TB	0			Active	4.73425
Hospital	117	14	140117007567346	4183		Adults >=15	Female	I or II	100-349	1728	4.73425		IPT and ART	0	No TB	0			Active	4.73425
Hospital	117	14	140117007944492	4187		Adults >=15	Female	I or II	100-349	1731	4.74247		IPT and ART	0	No TB	0			Active	4.74247
Hospital	21	12	120021006763885	4190		Adults >=15	Female	I or II	100-349	1736	4.75616		IPT and ART	0	No TB	0			Active	4.75616
Hospital	49	07	7.0049e+13	4193		Adults >=15	Female	I or II	100-349	1738	4.76164		IPT and ART	0	No TB	0			Active	4.76164
Hospital	117	14	140117007598900	4194		Adults >=15	Female	I or II	100-349	1739	4.76438		IPT and ART	0	No TB	0			Active	4.76438
Hospital	117	14	140117007949444	4198		Adults >=15	Female	I or II	100-349	1742	4.7726		IPT and ART	0	No TB	0			Active	4.7726
Hospital	117	14	140117008188967	4206		Adults >=15	Female	I or II	100-349	1755	4.80822		IPT and ART	0	No TB	0			Active	4.80822
Hospital	117	14	140117007525640	4209		Adults >=15	Female	I or II	100-349	1759	4.81918		IPT and ART	0	No TB	0			Active	4.81918
Hospital	117	14	140117007160069	4211		Adults >=15	Female	I or II	100-349	1762	4.8274		IPT and ART	0	No TB	0			Active	4.8274
Hospital	117	14	140117006236370	4212		Adults >=15	Female	I or II	100-349	1764	4.83288		IPT and ART	0	No TB	0			Active	4.83288
Hospital	117	14	140117008167068	4214		Adults >=15	Female	I or II	100-349	1768	4.84384		IPT and ART	0	No TB	0			Active	4.84384
Hospital	21	12	120021006253829	4216		Adults >=15	Female	I or II	100-349	1774	4.86027		IPT and ART	0	No TB	0			Active	4.86027
Hospital	115	14	140115009089866	4220		Adults >=15	Female	I or II	100-349	1777	4.86849		IPT and ART	0	No TB	0			Active	4.86849
Hospital	59	14	140059008510974	4222		Adults >=15	Female	I or II	100-349	1779	4.87397		IPT and ART	0	No TB	0			Active	4.87397
Hospital	117	14	140117008243283	4229		Adults >=15	Female	I or II	100-349	1786	4.89315		IPT and ART	0	No TB	0			Active	4.89315
Hospital	49	07	7.0049e+13	4232		Adults >=15	Female	I or II	100-349	1790	4.90411		IPT and ART	0	No TB	0			Active	4.90411
Hospital	117	14	140117007992945	4233		Adults >=15	Female	I or II	100-349	1793	4.91233		IPT and ART	0	No TB	0			Active	4.91233
Hospital	115	14	140115009002209	4238		Adults >=15	Female	I or II	100-349	1826	5.00274		IPT and ART	0	No TB	0			Active	5.00274
Hospital	115	14	140115008944811	4239		Adults >=15	Female	I or II	100-349	1826	5.00274		IPT and ART	0	No TB	0			LOST	5.00274
Hospital	115	14	140115006755769	4242		Adults >=15	Female	I or II	100-349	1830	5.0137		IPT and ART	0	No TB	0			Active	5.0137
Hospital	115	14	140115008070281	4243		Adults >=15	Female	I or II	100-349	1830	5.0137		IPT and ART	0	No TB	0			Active	5.0137
Hospital	49	07	7.0049e+13	4244		Adults >=15	Female	I or II	100-349	1833	5.02192		IPT and ART	0	No TB	0			Active	5.02192
Hospital	117	14	140117008233238	4258		Adults >=15	Female	I or II	100-349	1865	5.10959		IPT and ART	0	No TB	0			Active	5.10959
Hospital	115	14	140115009092795	4260		Adults >=15	Female	I or II	100-349	1868	5.11781		IPT and ART	0	No TB	0			Active	5.11781
Hospital	49	07	7.0049e+13	4261		Adults >=15	Female	I or II	100-349	1874	5.13425		IPT and ART	0	No TB	0			Active	5.13425
Hospital	49	07	7.0049e+13	4266		Adults >=15	Female	I or II	100-349	1887	5.16986		IPT and ART	0	No TB	0			Active	5.16986
Hospital	115	14	140115009092457	4270		Adults >=15	Female	I or II	100-349	1898	5.2		IPT and ART	0	No TB	0			Active	5.2
Hospital	115	14	140115008720624	4276		Adults >=15	Female	I or II	100-349	1917	5.25205		IPT and ART	0	No TB	0			Active	5.25205
Hospital	115	14	140115008680672	4278		Adults >=15	Female	I or II	100-349	1928	5.28219		IPT and ART	0	No TB	0			LOST	5.28219
Hospital	115	14	140115009071078	4281		Adults >=15	Female	I or II	100-349	1933	5.29589		IPT and ART	0	No TB	0			Active	5.29589
Hospital	115	14	140115009072112	4282		Adults >=15	Female	I or II	100-349	1934	5.29863		IPT and ART	0	No TB	0			Active	5.29863
Hospital	49	07	7.0049e+13	4296		Adults >=15	Female	I or II	100-349	1968	5.39178		IPT and ART	0	No TB	0			Active	5.39178
Hospital	49	07	7.0049e+13	4302		Adults >=15	Female	I or II	100-349	1988	5.44658		IPT and ART	0	No TB	0			Active	5.44658
Hospital	51	07	7.0051e+13	4304		Adults >=15	Female	I or II	100-349	1992	5.45753		IPT and ART	0	No TB	0			Active	5.45753
Hospital	51	07	7.0051e+13	4306		Adults >=15	Female	I or II	100-349	1993	5.46027		IPT and ART	0	No TB	0			Active	5.46027
Hospital	117	14	140117007173958	4312		Adults >=15	Female	I or II	100-349	2006	5.49589		IPT and ART	0	No TB	0			Active	5.49589
Hospital	51	07	7.0051e+13	4314		Adults >=15	Female	I or II	100-349	2010	5.50685		IPT and ART	0	No TB	0			Active	5.50685
Hospital	49	07	7.0049e+13	4316		Adults >=15	Female	I or II	100-349	2010	5.50685		IPT and ART	0	No TB	0			Active	5.50685
Hospital	51	07	7.0051e+13	4318		Adults >=15	Female	I or II	100-349	2012	5.51233		IPT and ART	0	No TB	0			Active	5.51233
Hospital	51	07	7.0051e+13	4322		Adults >=15	Female	I or II	100-349	2023	5.54247		IPT and ART	0	No TB	0			Active	5.54247
Hospital	115	14	140115009008102	4323		Adults >=15	Female	I or II	100-349	2025	5.54795		IPT and ART	0	No TB	0			Active	5.54795
Hospital	51	07	7.0051e+13	4325		Adults >=15	Female	I or II	100-349	2027	5.55342		IPT and ART	0	No TB	0			Active	5.55342
Hospital	51	07	7.0051e+13	4327		Adults >=15	Female	I or II	100-349	2033	5.56986		IPT and ART	0	No TB	0			Active	5.56986
Hospital	115	14	140115009006141	4334		Adults >=15	Female	I or II	100-349	2056	5.63288		IPT and ART	0	No TB	0			Active	5.63288
Hospital	51	07	7.0051e+13	4338		Adults >=15	Female	I or II	100-349	2061	5.64658		IPT and ART	0	No TB	0			Active	5.64658
Hospital	51	07	7.0051e+13	4344		Adults >=15	Female	I or II	100-349	2067	5.66301		IPT and ART	0	No TB	0			Active	5.66301
Hospital	59	14	140059007586804	4354		Adults >=15	Female	I or II	100-349	2078	5.69315		IPT and ART	0	No TB	0			Active	5.69315
Hospital	51	07	7.0051e+13	4363		Adults >=15	Female	I or II	100-349	2093	5.73425		IPT and ART	0	No TB	0			Active	5.73425
Hospital	51	07	7.0051e+13	4365		Adults >=15	Female	I or II	100-349	2098	5.74795		IPT and ART	0	No TB	0			Active	5.74795
Hospital	51	07	7.0051e+13	4370		Adults >=15	Female	I or II	100-349	2122	5.8137		IPT and ART	0	No TB	0			Active	5.8137
Hospital	51	07	7.0051e+13	4376		Adults >=15	Female	I or II	100-349	2150	5.89041		IPT and ART	0	No TB	0			Active	5.89041
Hospital	115	14	140115008913281	4377		Adults >=15	Female	I or II	100-349	2150	5.89041		IPT and ART	0	No TB	0			Active	5.89041
Hospital	115	14	140115007645876	4386		Adults >=15	Female	I or II	100-349	2178	5.96712		IPT and ART	0	No TB	0			Active	5.96712
Hospital	115	14	140115008884610	4391		Adults >=15	Female	I or II	100-349	2187	5.99178		IPT and ART	0	No TB	0			Active	5.99178
Hospital	115	14	140115008852236	4392		Adults >=15	Female	I or II	100-349	2187	5.99178		IPT and ART	0	No TB	0			Active	5.99178
Hospital	51	07	7.0051e+13	4396		Adults >=15	Female	I or II	100-349	2209	6.05205		IPT and ART	0	No TB	0			Active	6.05205
Hospital	51	07	70051005123964	4398		Adults >=15	Female	I or II	100-349	2218	6.07671		IPT and ART	0	No TB	0			Active	6.07671
Hospital	51	07	7.0051e+13	4399		Adults >=15	Female	I or II	100-349	2236	6.12603		IPT and ART	0	No TB	0			Active	6.12603
Hospital	51	07	7.0051e+13	4404		Adults >=15	Female	I or II	100-349	2242	6.14247		IPT and ART	0	No TB	0			Active	6.14247
Hospital	51	07	7.0051e+13	4406		Adults >=15	Female	I or II	100-349	2252	6.16986		IPT and ART	0	No TB	0			Active	6.16986
Hospital	51	07	7.0051e+13	4409		Adults >=15	Female	I or II	100-349	2258	6.1863		IPT and ART	0	No TB	0			Active	6.1863
Hospital	115	14	140115008811205	4410		Adults >=15	Female	I or II	100-349	2261	6.19452		IPT and ART	0	No TB	0			Active	6.19452
Hospital	51	07	7.0051e+13	4412		Adults >=15	Female	I or II	100-349	2267	6.21096		IPT and ART	0	No TB	0			Active	6.21096
Hospital	115	14	140115006091310	4418		Adults >=15	Female	I or II	100-349	2288	6.26849		IPT and ART	0	No TB	0			Active	6.26849
Hospital	115	14	140115008655040	4419		Adults >=15	Female	I or II	100-349	2291	6.27671		IPT and ART	0	No TB	0			Active	6.27671
Hospital	115	14	140115007327781	4420		Adults >=15	Female	I or II	100-349	2296	6.29041		IPT and ART	0	No TB	0			Active	6.29041
Hospital	115	14	140115008637994	4421		Adults >=15	Female	I or II	100-349	2298	6.29589		IPT and ART	0	No TB	0			Active	6.29589
Hospital	115	14	140115008297294	4424		Adults >=15	Female	I or II	100-349	2312	6.33425		IPT and ART	0	No TB	0			Active	6.33425
Hospital	115	14	140115007393263	4430		Adults >=15	Female	I or II	100-349	2333	6.39178		IPT and ART	0	No TB	0			Active	6.39178
Hospital	115	14	140115008774622	4435		Adults >=15	Female	I or II	100-349	2346	6.4274		IPT and ART	0	No TB	0			Active	6.4274
Hospital	115	14	140115008624612	4436		Adults >=15	Female	I or II	100-349	2347	6.43014		IPT and ART	0	No TB	0			Active	6.43014
Hospital	115	14	140115008287025	4438		Adults >=15	Female	I or II	100-349	2348	6.43288		IPT and ART	0	No TB	0			Active	6.43288
Hospital	115	14	140115008399085	4439		Adults >=15	Female	I or II	100-349	2357	6.45753		IPT and ART	0	No TB	0			Active	6.45753
Hospital	115	14	140115008637107	4443		Adults >=15	Female	I or II	100-349	2363	6.47397		IPT and ART	0	No TB	0			Active	6.47397
Hospital	115	14	140115008748781	4444		Adults >=15	Female	I or II	100-349	2367	6.48493		IPT and ART	0	No TB	0			Active	6.48493
Hospital	115	14	140115008228177	4447		Adults >=15	Female	I or II	100-349	2374	6.50411		IPT and ART	0	No TB	0			Active	6.50411
Hospital	115	14	140115008274102	4449		Adults >=15	Female	I or II	100-349	2377	6.51233		IPT and ART	0	No TB	0			Active	6.51233
Hospital	115	14	140115008525360	4452		Adults >=15	Female	I or II	100-349	2395	6.56164		IPT and ART	0	No TB	0			Active	6.56164
Hospital	115	14	140115008517793	4453		Adults >=15	Female	I or II	100-349	2397	6.56712		IPT and ART	0	No TB	0			Active	6.56712
Hospital	115	14	140115008349721	4454		Adults >=15	Female	I or II	100-349	2399	6.5726		IPT and ART	0	No TB	0			Active	6.5726
Hospital	115	14	140115008651199	4460		Adults >=15	Female	I or II	100-349	2422	6.63562		IPT and ART	0	No TB	0			Active	6.63562
Hospital	115	14	140115008226573	4461		Adults >=15	Female	I or II	100-349	2432	6.66301		IPT and ART	0	No TB	0			Active	6.66301
Hospital	115	14	140115007094235	4462		Adults >=15	Female	I or II	100-349	2433	6.66575		IPT and ART	0	No TB	0			Active	6.66575
Hospital	51	07	7.0051e+13	4464		Adults >=15	Female	I or II	100-349	2442	6.69041		IPT and ART	0	No TB	0			Active	6.69041
Hospital	49	07	7.0049e+13	4466		Adults >=15	Female	I or II	100-349	2446	6.70137		IPT and ART	0	No TB	0			Active	6.70137
Hospital	115	14	140115008637285	4469		Adults >=15	Female	I or II	100-349	2449	6.70959		IPT and ART	0	No TB	0			Active	6.70959
Hospital	115	14	140115008475538	4471		Adults >=15	Female	I or II	100-349	2465	6.75342		IPT and ART	0	No TB	0			Active	6.75342
Hospital	115	14	140115008663542	4473		Adults >=15	Female	I or II	100-349	2484	6.80548		IPT and ART	0	No TB	0			Active	6.80548
Hospital	49	07	7.0049e+13	4477		Adults >=15	Female	I or II	100-349	2564	7.02466		IPT and ART	0	No TB	0			Active	7.02466
Hospital	117	14	140117007727535	4478		Adults >=15	Female	I or II	100-349	2576	7.05753		IPT and ART	0	No TB	0			Active	7.05753
Hospital	49	07	7.0049e+13	4480		Adults >=15	Female	I or II	100-349	2656	7.27671		IPT and ART	0	No TB	0			Active	7.27671
Hospital	49	07	7.0049e+13	4484		Adults >=15	Female	I or II	100-349	2904	7.95616		IPT and ART	0	No TB	0			Active	7.95616
Hospital	117	14	140117007555382	536		Pediatric <15	Female	I or II	100-349	298	0.816438		IPT and ART	0	No TB	0			DROP	0.816438
Hospital	115	14	140115010312447	836		Pediatric <15	Female	I or II	100-349	437	1.19726		IPT and ART	0	No TB	0			DROP	1.19726
Hospital	115	14	140115010321441	938		Pediatric <15	Female	I or II	100-349	490	1.34247		IPT and ART	0	No TB	0			Active	1.34247
Hospital	115	14	140115010319662	974		Pediatric <15	Female	I or II	100-349	503	1.37808		IPT and ART	0	No TB	0			Active	1.37808
Hospital	47	07	7.0047e+13	975		Pediatric <15	Female	I or II	100-349	503	1.37808		IPT and ART	0	No TB	0			Active	1.37808
Hospital	115	14	140115010323841	989		Pediatric <15	Female	I or II	100-349	505	1.38356		IPT and ART	0	No TB	0			Active	1.38356
Hospital	115	14	140115010352427	1038		Pediatric <15	Female	I or II	100-349	520	1.42466		IPT and ART	0	No TB	0			Active	1.42466
Hospital	115	14	140115010344416	1104		Pediatric <15	Female	I or II	100-349	545	1.49315		IPT and ART	0	No TB	0				1.49315
Hospital	47	07	70047008392310	1148		Pediatric <15	Female	I or II	100-349	567	1.55342		IPT and ART	0	No TB	0			Active	1.55342
Hospital	115	14	140115010310984	1149		Pediatric <15	Female	I or II	100-349	567	1.55342		IPT and ART	0	No TB	0			Active	1.55342
Hospital	115	14	140115010325711	1175		Pediatric <15	Female	I or II	100-349	576	1.57808		IPT and ART	0	No TB	0			Active	1.57808
Hospital	115	14	140115010310185	1199		Pediatric <15	Female	I or II	100-349	585	1.60274		IPT and ART	0	No TB	0			Active	1.60274
Hospital	115	14	140115010318639	1217		Pediatric <15	Female	I or II	100-349	591	1.61918		IPT and ART	0	No TB	0			Active	1.61918
Hospital	115	14	140115010318045	1226		Pediatric <15	Female	I or II	100-349	594	1.6274		IPT and ART	0	No TB	0			Active	1.6274
Hospital	115	14	140115010331399	1322		Pediatric <15	Female	I or II	100-349	645	1.76712		IPT and ART	0	No TB	0			Active	1.76712
Hospital	115	14	140115010311317	1351		Pediatric <15	Female	I or II	100-349	656	1.79726		IPT and ART	0	No TB	0			Active	1.79726
Hospital	115	14	140115010312679	1366		Pediatric <15	Female	I or II	100-349	661	1.81096		IPT and ART	0	No TB	0			Active	1.81096
Hospital	115	14	140115010336989	1374		Pediatric <15	Female	I or II	100-349	663	1.81644		IPT and ART	0	No TB	0			Active	1.81644
Hospital	51	07	7.0051e+13	1383		Pediatric <15	Female	I or II	100-349	668	1.83014		IPT and ART	0	No TB	0			TO	1.83014
Hospital	115	14	140115010316292	1389		Pediatric <15	Female	I or II	100-349	670	1.83562		IPT and ART	0	No TB	0			Active	1.83562
Hospital	115	14	140115010318078	1410		Pediatric <15	Female	I or II	100-349	674	1.84658		IPT and ART	0	No TB	0			Active	1.84658
Hospital	115	14	140115010333840	1414		Pediatric <15	Female	I or II	100-349	675	1.84932		IPT and ART	0	No TB	0			Active	1.84932
Hospital	115	14	140115010333905	1434		Pediatric <15	Female	I or II	100-349	684	1.87397		IPT and ART	0	No TB	0			Active	1.87397
Hospital	115	14	140115010317879	1461		Pediatric <15	Female	I or II	100-349	695	1.90411		IPT and ART	0	No TB	0			Active	1.90411
Hospital	115	14	140115010344738	1468		Pediatric <15	Female	I or II	100-349	698	1.91233		IPT and ART	0	No TB	0			Active	1.91233
Hospital	115	14	140115010334523	1482		Pediatric <15	Female	I or II	100-349	704	1.92877		IPT and ART	0	No TB	0			Active	1.92877
Hospital	115	14	140115010329768	1543		Pediatric <15	Female	I or II	100-349	733	2.00822		IPT and ART	0	No TB	0			Active	2.00822
Hospital	115	14	140115010325580	1561		Pediatric <15	Female	I or II	100-349	741	2.03014		IPT and ART	0	No TB	0			Active	2.03014
Hospital	115	14	140115010331464	1566		Pediatric <15	Female	I or II	100-349	744	2.03836		IPT and ART	0	No TB	0			Active	2.03836
Hospital	115	14	140115010313044	1632		Pediatric <15	Female	I or II	100-349	770	2.10959		IPT and ART	0	No TB	0			Active	2.10959
Hospital	115	14	140115010319464	1801		Pediatric <15	Female	I or II	100-349	857	2.34795		IPT and ART	0	No TB	0			LOST	2.34795
Hospital	49	07	70049007140453	1835		Pediatric <15	Female	I or II	100-349	876	2.4		IPT and ART	0	No TB	0			Active	2.4
Hospital	115	14	140115010334653	1900		Pediatric <15	Female	I or II	100-349	912	2.49863		IPT and ART	0	No TB	0			Active	2.49863
Hospital	115	14	140115010345252	1968		Pediatric <15	Female	I or II	100-349	945	2.58904		IPT and ART	0	No TB	0			Active	2.58904
Hospital	115	14	140115010329735	1987		Pediatric <15	Female	I or II	100-349	952	2.60822		IPT and ART	0	No TB	0			Active	2.60822
Hospital	115	14	140115010319497	2001		Pediatric <15	Female	I or II	100-349	958	2.62466		IPT and ART	0	No TB	0			Active	2.62466
Hospital	115	14	140115010346570	2039		Pediatric <15	Female	I or II	100-349	974	2.66849		IPT and ART	0	No TB	0			Active	2.66849
Hospital	115	14	140115010311583	2049		Pediatric <15	Female	I or II	100-349	980	2.68493		IPT and ART	0	No TB	0			Active	2.68493
Hospital	115	14	140115010328625	2111		Pediatric <15	Female	I or II	100-349	1006	2.75616		IPT and ART	0	No TB	0			Active	2.75616
Hospital	115	14	140115010325056	2127		Pediatric <15	Female	I or II	100-349	1013	2.77534		IPT and ART	0	No TB	0			Active	2.77534
Hospital	115	14	140115010334295	2128		Pediatric <15	Female	I or II	100-349	1013	2.77534		IPT and ART	0	No TB	0			Active	2.77534
Hospital	115	14	140115010330257	2171		Pediatric <15	Female	I or II	100-349	1024	2.80548		IPT and ART	0	No TB	0			Active	2.80548
Hospital	115	14	140115010313808	2206		Pediatric <15	Female	I or II	100-349	1036	2.83836		IPT and ART	0	No TB	0			Active	2.83836
Hospital	115	14	140115010331594	2209		Pediatric <15	Female	I or II	100-349	1036	2.83836		IPT and ART	0	No TB	0			Active	2.83836
Hospital	115	14	140115010311782	2227		Pediatric <15	Female	I or II	100-349	1045	2.86301		IPT and ART	0	No TB	0			Active	2.86301
Hospital	115	14	140115010310385	2268		Pediatric <15	Female	I or II	100-349	1058	2.89863		IPT and ART	0	No TB	0			Active	2.89863
Hospital	21	12	120021007760041	3107		Pediatric <15	Female	I or II	100-349	1337	3.66301		IPT and ART	0	No TB	0			Active	3.66301
Hospital	21	12	120021006122493	3231		Pediatric <15	Female	I or II	100-349	1374	3.76438		IPT and ART	0	No TB	0			Active	3.76438
Hospital	21	12	120021006261492	4236		Pediatric <15	Female	I or II	100-349	1821	4.98904		IPT and ART	0	No TB	0			Active	4.98904
Hospital	51	07	7.0051e+13	40		Adults >=15	Female	III or IV	>349	29	0.0794521		IPT only	0	No TB	0				0.0794521
Hospital	21	12	120021008100768	41		Adults >=15	Female	III or IV	>349	29	0.0794521		IPT only	0	No TB	0				0.0794521
Hospital	21	12	120021008013674	42		Adults >=15	Female	III or IV	>349	29	0.0794521		IPT only	0	No TB	0				0.0794521
Hospital	271	07	7.0271e+13	45		Adults >=15	Female	III or IV	>349	29	0.0794521		IPT only	0	No TB	0				0.0794521
Hospital	176	07	7.0176e+13	36		Adults >=15	Female	III or IV	100-349	29	0.0794521		IPT only	0	No TB	0				0.0794521
Hospital	21	12	120021007530480	47		Adults >=15	Male	III or IV	100-349	30	0.0821918		IPT and ART	0	No TB	0			DEAD	0.0821918
Hospital	117	14	140117008251403	46		Adults >=15	Female	III or IV	>349	30	0.0821918		IPT only	0	No TB	0				0.0821918
Hospital	21	12	120021007545918	321		Adults >=15	Male	I or II	100-349	180	0.493151		IPT and ART	0	No TB	0			DROP	0.493151
Hospital	59	14	140059008112528	322		Adults >=15	Male	I or II	100-349	180	0.493151		IPT and ART	0	No TB	0			TO	0.493151
Hospital	21	12	120021007741534	371		Adults >=15	Male	I or II	100-349	200	0.547945		IPT and ART	0	No TB	0			DROP	0.547945
Hospital	21	12	120021008241176	423		Adults >=15	Male	I or II	100-349	237	0.649315		IPT and ART	0	No TB	0			DROP	0.649315
Hospital	176	07	7.0176e+13	465		Adults >=15	Male	I or II	100-349	265	0.726027		IPT and ART	0	No TB	0			Active	0.726027
Hospital	51	07	7.0051e+13	479		Adults >=15	Male	I or II	100-349	270	0.739726		IPT and ART	0	No TB	0			DEAD	0.739726
Hospital	176	07	7.0176e+13	511		Adults >=15	Male	I or II	100-349	284	0.778082		IPT and ART	0	No TB	0			Active	0.778082
Hospital	21	12	120021008251403	516		Adults >=15	Male	I or II	100-349	287	0.786301		IPT and ART	0	No TB	0			Active	0.786301
Hospital	115	14	140115007160069	537		Adults >=15	Male	I or II	100-349	298	0.816438		IPT and ART	0	No TB	0			DROP	0.816438
Hospital	115	14	140115008206856	542		Adults >=15	Male	I or II	100-349	299	0.819178		IPT and ART	0	No TB	0			DROP	0.819178
Hospital	21	12	120021007775276	546		Adults >=15	Male	I or II	100-349	301	0.824658		IPT and ART	0	No TB	0			DROP	0.824658
Hospital	153	07	7.0153e+13	569		Adults >=15	Male	I or II	100-349	317	0.868493		IPT and ART	0	No TB	0			Active	0.868493
Hospital	153	07	7.0153e+13	586		Adults >=15	Male	I or II	100-349	328	0.89863		IPT and ART	0	No TB	0			Active	0.89863
Hospital	49	07	7.0049e+13	591		Adults >=15	Male	I or II	100-349	331	0.906849		IPT and ART	0	No TB	0			Active	0.906849
Hospital	176	07	7.0176e+13	592		Adults >=15	Male	I or II	100-349	331	0.906849		IPT and ART	0	No TB	0			Active	0.906849
Hospital	271	07	7.0271e+13	609		Adults >=15	Male	I or II	100-349	338	0.926027		IPT and ART	0	No TB	0			Active	0.926027
Hospital	21	12	120021007690743	610		Adults >=15	Male	I or II	100-349	338	0.926027		IPT and ART	0	No TB	0			TO	0.926027
Hospital	51	07	7.0051e+13	612		Adults >=15	Male	I or II	100-349	339	0.928767		IPT and ART	0	No TB	0			Active	0.928767
Hospital	110	07	7.011e+13	614		Adults >=15	Male	I or II	100-349	340	0.931507		IPT and ART	0	No TB	0			DROP	0.931507
Hospital	59	14	140059007878155	656		Adults >=15	Male	I or II	100-349	362	0.991781		IPT and ART	0	No TB	0			Active	0.991781
Hospital	21	12	120021008107720	690		Adults >=15	Male	I or II	100-349	373	1.02192		IPT and ART	0	No TB	0			TO	1.02192
Hospital	49	07	7.0049e+13	695		Adults >=15	Male	I or II	100-349	374	1.02466		IPT and ART	0	No TB	0			TO	1.02466
Hospital	21	12	120021008204398	734		Adults >=15	Male	I or II	100-349	393	1.07671		IPT and ART	0	No TB	0			Active	1.07671
Hospital	51	07	7.0051e+13	737		Adults >=15	Male	I or II	100-349	395	1.08219		IPT and ART	0	No TB	0			TO	1.08219
Hospital	21	12	120021008076826	759		Adults >=15	Male	I or II	100-349	408	1.11781		IPT and ART	0	No TB	0			DROP	1.11781
Hospital	21	12	120021008201660	762		Adults >=15	Male	I or II	100-349	409	1.12055		IPT and ART	0	No TB	0			Active	1.12055
Hospital	271	07	70271007683864	797		Adults >=15	Male	I or II	100-349	422	1.15616		IPT and ART	0	No TB	0			Active	1.15616
Hospital	21	12	120021007864804	803		Adults >=15	Male	I or II	100-349	423	1.1589		IPT and ART	0	No TB	0			TO	1.1589
Hospital	176	07	7.0176e+13	811		Adults >=15	Male	I or II	100-349	425	1.16438		IPT and ART	0	No TB	0			Active	1.16438
Hospital	21	12	120021008190354	835		Adults >=15	Male	I or II	100-349	437	1.19726		IPT and ART	0	No TB	0			Active	1.19726
Hospital	271	07	7.0271e+13	849		Adults >=15	Male	I or II	100-349	443	1.2137		IPT and ART	0	No TB	0			Active	1.2137
Hospital	271	07	7.0271e+13	894		Adults >=15	Male	I or II	100-349	469	1.28493		IPT and ART	0	No TB	0			Active	1.28493
Hospital	271	07	7.0271e+13	902		Adults >=15	Male	I or II	100-349	471	1.29041		IPT and ART	0	No TB	0			Active	1.29041
Hospital	176	07	7.0176e+13	908		Adults >=15	Male	I or II	100-349	475	1.30137		IPT and ART	0	No TB	0			Active	1.30137
Hospital	21	12	120021006880384	927		Adults >=15	Male	I or II	100-349	485	1.32877		IPT and ART	0	No TB	0			TO	1.32877
Hospital	115	14	140115008534640	956		Adults >=15	Male	I or II	100-349	497	1.36164		IPT and ART	0	No TB	0			TO	1.36164
Hospital	21	12	120021008115222	965		Adults >=15	Male	I or II	100-349	501	1.3726		IPT and ART	0	No TB	0			Active	1.3726
Hospital	271	07	7.0271e+13	1000		Adults >=15	Male	I or II	100-349	508	1.39178		IPT and ART	0	No TB	0			Active	1.39178
Hospital	153	07	7.0153e+13	1090		Adults >=15	Male	I or II	100-349	539	1.47671		IPT and ART	0	No TB	0			Active	1.47671
Hospital	117	14	140117008440528	1100		Adults >=15	Male	I or II	100-349	544	1.49041		IPT and ART	0	No TB	0			Active	1.49041
Hospital	176	07	7.0176e+13	1164		Adults >=15	Male	I or II	100-349	571	1.56438		IPT and ART	0	No TB	0			Active	1.56438
Hospital	115	14	140115007262629	1194		Adults >=15	Male	I or II	100-349	582	1.59452		IPT and ART	0	No TB	0			Active	1.59452
Hospital	271	07	7.0271e+13	1250		Adults >=15	Male	I or II	100-349	601	1.64658		IPT and ART	0	No TB	0			Active	1.64658
Hospital	51	07	7.0051e+13	1288		Adults >=15	Male	I or II	100-349	625	1.71233		IPT and ART	0	No TB	0			TO	1.71233
Hospital	110	07	7.011e+13	1296		Adults >=15	Male	I or II	100-349	631	1.72877		IPT and ART	0	No TB	0			Active	1.72877
Hospital	271	07	7.0271e+13	1301		Adults >=15	Male	I or II	100-349	632	1.73151		IPT and ART	0	No TB	0			Active	1.73151
Hospital	51	07	70051006208590	1312		Adults >=15	Male	I or II	100-349	640	1.75342		IPT and ART	0	No TB	0			TO	1.75342
Hospital	271	07	7.0271e+13	1348		Adults >=15	Male	I or II	100-349	655	1.79452		IPT and ART	0	No TB	0			Active	1.79452
Hospital	115	14	140115009356689	1376		Adults >=15	Male	I or II	100-349	664	1.81918		IPT and ART	0	No TB	0			Active	1.81918
Hospital	115	14	140115009017605	1385		Adults >=15	Male	I or II	100-349	668	1.83014		IPT and ART	0	No TB	0			Active	1.83014
Hospital	51	07	7.0051e+13	1407		Adults >=15	Male	I or II	100-349	673	1.84384		IPT and ART	0	No TB	0			DEAD	1.84384
Hospital	21	12	120021007717796	1433		Adults >=15	Male	I or II	100-349	683	1.87123		IPT and ART	0	No TB	0			TO	1.87123
Hospital	59	14	140059008309923	1458		Adults >=15	Male	I or II	100-349	693	1.89863		IPT and ART	0	No TB	0			Active	1.89863
Hospital	21	12	120021008081784	1481		Adults >=15	Male	I or II	100-349	703	1.92603		IPT and ART	0	No TB	0			Active	1.92603
Hospital	153	07	70153005572154	1516		Adults >=15	Male	I or II	100-349	720	1.9726		IPT and ART	0	No TB	0			DEAD	1.9726
Hospital	21	12	120021006670766	1535		Adults >=15	Male	I or II	100-349	730	2		IPT and ART	0	No TB	0			DROP	2
Hospital	115	14	140115008891374	1546		Adults >=15	Male	I or II	100-349	734	2.01096		IPT and ART	0	No TB	0			DROP	2.01096
Hospital	117	14	140117008101678	1563		Adults >=15	Male	I or II	100-349	742	2.03288		IPT and ART	0	No TB	0			TO	2.03288
Hospital	49	07	7.0049e+13	1565		Adults >=15	Male	I or II	100-349	744	2.03836		IPT and ART	0	No TB	0			TO	2.03836
Hospital	21	12	120021007935945	1572		Adults >=15	Male	I or II	100-349	746	2.04384		IPT and ART	0	No TB	0			TO	2.04384
Hospital	21	12	120021008047829	1579		Adults >=15	Male	I or II	100-349	748	2.04932		IPT and ART	0	No TB	0			Active	2.04932
Hospital	21	12	120021006013715	1586		Adults >=15	Male	I or II	100-349	750	2.05479		IPT and ART	0	No TB	0			DROP	2.05479
Hospital	115	14	140115007703459	1603		Adults >=15	Male	I or II	100-349	756	2.07123		IPT and ART	0	No TB	0			Active	2.07123
Hospital	117	14	140117008032360	1610		Adults >=15	Male	I or II	100-349	758	2.07671		IPT and ART	0	No TB	0			Active	2.07671
Hospital	59	14	140059008282230	1631		Adults >=15	Male	I or II	100-349	770	2.10959		IPT and ART	0	No TB	0			Active	2.10959
Hospital	117	14	140117006635947	1650		Adults >=15	Male	I or II	100-349	779	2.13425		IPT and ART	0	No TB	0			Active	2.13425
Hospital	115	14	140115008335911	1652		Adults >=15	Male	I or II	100-349	779	2.13425		IPT and ART	0	No TB	0			Active	2.13425
Hospital	21	12	120021006840547	1655		Adults >=15	Male	I or II	100-349	781	2.13973		IPT and ART	0	No TB	0			DROP	2.13973
Hospital	49	07	7.0049e+13	1661		Adults >=15	Male	I or II	100-349	785	2.15068		IPT and ART	0	No TB	0			DROP	2.15068
Hospital	153	07	7.0153e+13	1678		Adults >=15	Male	I or II	100-349	793	2.1726		IPT and ART	0	No TB	0			Active	2.1726
Hospital	110	07	7.011e+13	1680		Adults >=15	Male	I or II	100-349	794	2.17534		IPT and ART	0	No TB	0			DROP	2.17534
Hospital	21	12	120021008029433	1691		Adults >=15	Male	I or II	100-349	801	2.19452		IPT and ART	0	No TB	0			Active	2.19452
Hospital	153	07	7.0153e+13	1701		Adults >=15	Male	I or II	100-349	804	2.20274		IPT and ART	0	No TB	0			Active	2.20274
Hospital	153	07	7.0153e+13	1724		Adults >=15	Male	I or II	100-349	816	2.23562		IPT and ART	0	No TB	0			Active	2.23562
Hospital	21	12	120021008018296	1735		Adults >=15	Male	I or II	100-349	821	2.24932		IPT and ART	0	No TB	0			Active	2.24932
Hospital	59	14	140059007494986	1752		Adults >=15	Male	I or II	100-349	832	2.27945		IPT and ART	0	No TB	0			Active	2.27945
Hospital	21	12	120021008041735	1753		Adults >=15	Male	I or II	100-349	832	2.27945		IPT and ART	0	No TB	0			Active	2.27945
Hospital	117	14	140117007315218	1762		Adults >=15	Male	I or II	100-349	834	2.28493		IPT and ART	0	No TB	0			Active	2.28493
Hospital	49	07	7.0049e+13	1786		Adults >=15	Male	I or II	100-349	847	2.32055		IPT and ART	0	No TB	0			Active	2.32055
Hospital	51	07	7.0051e+13	1799		Adults >=15	Male	I or II	100-349	856	2.34521		IPT and ART	0	No TB	0			Active	2.34521
Hospital	59	14	140059008141772	1802		Adults >=15	Male	I or II	100-349	857	2.34795		IPT and ART	0	No TB	0			Active	2.34795
Hospital	153	07	7.0153e+13	1804		Adults >=15	Male	I or II	100-349	859	2.35342		IPT and ART	0	No TB	0			Active	2.35342
Hospital	49	07	7.0049e+13	1837		Adults >=15	Male	I or II	100-349	879	2.40822		IPT and ART	0	No TB	0			Active	2.40822
Hospital	271	07	7.0271e+13	1841		Adults >=15	Male	I or II	100-349	881	2.4137		IPT and ART	0	No TB	0			Active	2.4137
Hospital	271	07	7.0271e+13	1855		Adults >=15	Male	I or II	100-349	887	2.43014		IPT and ART	0	No TB	0			Active	2.43014
Hospital	47	07	7.0047e+13	1862		Adults >=15	Male	I or II	100-349	890	2.43836		IPT and ART	0	No TB	0			Active	2.43836
Hospital	115	14	140115009341105	1871		Adults >=15	Male	I or II	100-349	895	2.45205		IPT and ART	0	No TB	0			Active	2.45205
Hospital	271	07	7.0271e+13	1875		Adults >=15	Male	I or II	100-349	897	2.45753		IPT and ART	0	No TB	0			Active	2.45753
Hospital	117	14	140117008616676	1885		Adults >=15	Male	I or II	100-349	901	2.46849		IPT and ART	0	No TB	0			Active	2.46849
Hospital	153	07	7.0153e+13	1911		Adults >=15	Male	I or II	100-349	920	2.52055		IPT and ART	0	No TB	0			Active	2.52055
Hospital	110	07	7.011e+13	1928		Adults >=15	Male	I or II	100-349	926	2.53699		IPT and ART	0	No TB	0			DROP	2.53699
Hospital	21	12	120021008019942	1934		Adults >=15	Male	I or II	100-349	929	2.54521		IPT and ART	0	No TB	0			Active	2.54521
Hospital	49	07	7.0049e+13	1955		Adults >=15	Male	I or II	100-349	940	2.57534		IPT and ART	0	No TB	0			Active	2.57534
Hospital	153	07	70153005805135	1966		Adults >=15	Male	I or II	100-349	944	2.5863		IPT and ART	0	No TB	0			Active	2.5863
Hospital	49	07	7.0049e+13	1985		Adults >=15	Male	I or II	100-349	952	2.60822		IPT and ART	0	No TB	0			Active	2.60822
Hospital	59	14	140059007220374	2002		Adults >=15	Male	I or II	100-349	958	2.62466		IPT and ART	0	No TB	0			Active	2.62466
Hospital	51	07	7.0051e+13	2007		Adults >=15	Male	I or II	100-349	960	2.63014		IPT and ART	0	No TB	0			TO	2.63014
Hospital	21	12	120021007699389	2033		Adults >=15	Male	I or II	100-349	970	2.65753		IPT and ART	0	No TB	0			TO	2.65753
Hospital	51	07	7.0051e+13	2043		Adults >=15	Male	I or II	100-349	976	2.67397		IPT and ART	0	No TB	0			DEAD	2.67397
Hospital	59	14	140059007037028	2052		Adults >=15	Male	I or II	100-349	980	2.68493		IPT and ART	0	No TB	0			LOST	2.68493
Hospital	153	07	7.0153e+13	2066		Adults >=15	Male	I or II	100-349	987	2.70411		IPT and ART	0	No TB	0			Active	2.70411
Hospital	59	14	140059008250881	2072		Adults >=15	Male	I or II	100-349	988	2.70685		IPT and ART	0	No TB	0			Active	2.70685
Hospital	59	14	140059008176673	2081		Adults >=15	Male	I or II	100-349	991	2.71507		IPT and ART	0	No TB	0			DEAD	2.71507
Hospital	21	12	120021007986845	2092		Adults >=15	Male	I or II	100-349	995	2.72603		IPT and ART	0	No TB	0			Active	2.72603
Hospital	271	07	7.0271e+13	2097		Adults >=15	Male	I or II	100-349	997	2.73151		IPT and ART	0	No TB	0			Active	2.73151
Hospital	271	07	7.0271e+13	2112		Adults >=15	Male	I or II	100-349	1007	2.7589		IPT and ART	0	No TB	0			Active	2.7589
Hospital	59	14	140059007955425	2126		Adults >=15	Male	I or II	100-349	1012	2.7726		IPT and ART	0	No TB	0			Active	2.7726
Hospital	176	07	7.0176e+13	2130		Adults >=15	Male	I or II	100-349	1013	2.77534		IPT and ART	0	No TB	0			Active	2.77534
Hospital	21	12	120021007954021	2168		Adults >=15	Male	I or II	100-349	1023	2.80274		IPT and ART	0	No TB	0			Active	2.80274
Hospital	153	07	7.0153e+13	2169		Adults >=15	Male	I or II	100-349	1024	2.80548		IPT and ART	0	No TB	0			Active	2.80548
Hospital	21	12	120021007975565	2185		Adults >=15	Male	I or II	100-349	1028	2.81644		IPT and ART	0	No TB	0			Active	2.81644
Hospital	117	14	140117005017280	2189		Adults >=15	Male	I or II	100-349	1030	2.82192		IPT and ART	0	No TB	0			Active	2.82192
Hospital	21	12	120021007741968	2193		Adults >=15	Male	I or II	100-349	1032	2.8274		IPT and ART	0	No TB	0			TO	2.8274
Hospital	117	14	140117006173786	2199		Adults >=15	Male	I or II	100-349	1033	2.83014		IPT and ART	0	No TB	0			Active	2.83014
Hospital	21	12	120021007962764	2208		Adults >=15	Male	I or II	100-349	1036	2.83836		IPT and ART	0	No TB	0			Active	2.83836
Hospital	176	07	7.0176e+13	2210		Adults >=15	Male	I or II	100-349	1037	2.8411		IPT and ART	0	No TB	0			TO	2.8411
Hospital	21	12	120021007942718	2226		Adults >=15	Male	I or II	100-349	1045	2.86301		IPT and ART	0	No TB	0			Active	2.86301
Hospital	21	12	120021006626718	2230		Adults >=15	Male	I or II	100-349	1046	2.86575		IPT and ART	0	No TB	0			Active	2.86575
Hospital	59	14	140059007599401	2241		Adults >=15	Male	I or II	100-349	1051	2.87945		IPT and ART	0	No TB	0			Active	2.87945
Hospital	59	14	140059007119636	2243		Adults >=15	Male	I or II	100-349	1052	2.88219		IPT and ART	0	No TB	0			Active	2.88219
Hospital	117	14	140117008354674	2249		Adults >=15	Male	I or II	100-349	1054	2.88767		IPT and ART	0	No TB	0			Active	2.88767
Hospital	59	14	140059008281977	2257		Adults >=15	Male	I or II	100-349	1056	2.89315		IPT and ART	0	No TB	0			Active	2.89315
Hospital	49	07	7.0049e+13	2265		Adults >=15	Male	I or II	100-349	1058	2.89863		IPT and ART	0	No TB	0			DEAD	2.89863
Hospital	59	14	140059007314553	2278		Adults >=15	Male	I or II	100-349	1062	2.90959		IPT and ART	0	No TB	0			Active	2.90959
Hospital	21	12	120021007945555	2283		Adults >=15	Male	I or II	100-349	1064	2.91507		IPT and ART	0	No TB	0			Active	2.91507
Hospital	59	14	140059007213032	2288		Adults >=15	Male	I or II	100-349	1064	2.91507		IPT and ART	0	No TB	0			Active	2.91507
Hospital	115	14	140115007648740	2292		Adults >=15	Male	I or II	100-349	1065	2.91781		IPT and ART	0	No TB	0			Active	2.91781
Hospital	59	14	140059008737132	2319		Adults >=15	Male	I or II	100-349	1074	2.94247		IPT and ART	0	No TB	0			Active	2.94247
Hospital	117	14	140117007861727	2321		Adults >=15	Male	I or II	100-349	1075	2.94521		IPT and ART	0	No TB	0			DEAD	2.94521
Hospital	59	14	140059007653969	2324		Adults >=15	Male	I or II	100-349	1076	2.94795		IPT and ART	0	No TB	0			Active	2.94795
Hospital	115	14	140115008714239	2334		Adults >=15	Male	I or II	100-349	1080	2.9589		IPT and ART	0	No TB	0			Active	2.9589
Hospital	59	14	140059008327484	2336		Adults >=15	Male	I or II	100-349	1081	2.96164		IPT and ART	0	No TB	0			Active	2.96164
[truncated: 2,485 more rows]
